# Supplementary material for: What are the factors associated with HIV testing among male injecting and non-injecting drug users in Lashio, Myanmar: a cross-sectional study
Source: PubMed Central journal article supplement — BMJ Open. 2013 Jun 6;3(6):e002747. doi: 10.1136/bmjopen-2013-002747 (PMC3686230; doi:10.1136/bmjopen-2013-002747), 2013-06-06
Supplement: bmjopen-2013-002747.draft_revisions.pdf [file bmjopen-2013-002747.draft_revisions.pdf]

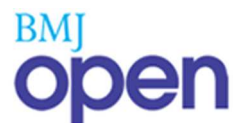

**Integrate HIV testing into drug treatment to increase testing uptake among male injecting and non-injecting drug users in Lashio, Myanmar: A cross-sectional study**

|                                 |                                                                                                                                                                                             |
|---------------------------------|---------------------------------------------------------------------------------------------------------------------------------------------------------------------------------------------|
| Journal:                        | <i>BMJ Open</i>                                                                                                                                                                             |
| Manuscript ID:                  | bmjopen-2013-002747                                                                                                                                                                         |
| Article Type:                   | Research                                                                                                                                                                                    |
| Date Submitted by the Author:   | 18-Feb-2013                                                                                                                                                                                 |
| Complete List of Authors:       | Saw, Yu Mon; The University of Tokyo,<br>Yasuoka, Junko; The University of Tokyo, Dept. of Community and Global Health<br>Saw, Thu Nandar<br>Poudel, Krishna<br>Tun, Soe<br>Jimba, Masamine |
| <b>Primary Subject Heading</b>: | HIV/AIDS                                                                                                                                                                                    |
| Secondary Subject Heading:      | HIV/AIDS                                                                                                                                                                                    |
| Keywords:                       | HIV & AIDS < INFECTIOUS DISEASES, HEALTH SERVICES ADMINISTRATION & MANAGEMENT, Public health < INFECTIOUS DISEASES                                                                          |
|                                 |                                                                                                                                                                                             |

SCHOLARONE™  
Manuscripts

Only

1  
2  
3  
4  
5 Integrate HIV testing into drug treatment to increase testing uptake among  
6 male injecting and non-injecting drug users in Lashio, Myanmar: A cross-  
7 sectional study  
8  
9

10  
11 *Yu Mon Saw<sup>1</sup>; Junko Yasuoka<sup>1</sup>; Thu Nandar Saw<sup>1</sup>; Krishna C. Poudel<sup>2</sup>; Soe Tun<sup>3</sup>;*  
12 *Masamine Jimba<sup>1</sup>*  
13

14  
15 *<sup>1</sup>Department of Community and Global Health, Graduate School of Medicine, the*  
16 *University of Tokyo, Tokyo, Japan*  
17

18  
19 *<sup>2</sup>Department of Public Health, School of Public Health and Health Science, University*  
20 *of Massachusetts Amherst, Amherst, MA, USA*  
21  
22

23  
24 *<sup>3</sup>Department of Preventive and Social Medicine, the University of Medicine 2,*  
25 *Yangon, Myanmar*  
26  
27

28  
29 \*Corresponding author

30 Junko Yasuoka D.Sc., M.P.H  
31 Department of Community and Global Health  
32 Graduate School of Medicine  
33 The University of Tokyo  
34 7-3-1 Hongo, Bunkyo-ku, Tokyo 113-0033, Japan  
35 E- mail: [jyasuoka@post.harvard.edu](mailto:jyasuoka@post.harvard.edu)  
36 [Tel: +81\(0\)3-5844-3698](tel:+810358443698)  
37 [Fax: +81\(0\)3-5841-3422](tel:+810358413422)  
38  
39  
40  
41  
42  
43  
44  
45  
46  
47  
48  
49  
50  
51  
52  
53  
54  
55

56 Word counts: Abstract: 249, Main Text: 2862, No. of Table: 3  
57  
58  
59  
60

## ARTICLE SUMMARY

### Article focus

- To identify factors associated with HIV testing among injecting (IDUs) and non-injecting drug users (NIDUs) in Lashio, Myanmar

### Key messages

- IDUs were more likely than NIDUs to have been tested for HIV.
- HIV testing rates were especially low among both IDUs and NIDUs engaging in risk behaviors.
- IDUs and NIDUs would benefit from integrating HIV testing services into drug treatment services.

### Strengths and limitation of this study

- The first look at HIV testing that covered both IDUs and NIDUs
- Respondent driven Sampling was used to recruit participants.
- HIV testing was self-reported by drug users.
- Results may not be generalized to drug users in other cities of Myanmar.

### Abstract

**Objectives** HIV testing is an effective intervention for reducing HIV risk and providing information on HIV status. However, uptake of HIV testing is a major challenge within the drug-using population due to their illegal drug use behaviors. This study aimed to identify factors associated with HIV testing among injecting (IDUs) and non-injecting drug users (NIDUs) in Lashio, Myanmar.

**Methods** A cross-sectional study was conducted from January to February 2010. In total, 158 male IDUs and 210 male NIDUs were recruited using a respondent-driven sampling method. A multivariate analysis was performed separately for IDUs and NIDUs.

**Results** Approximately 77% of IDUs and 46% of NIDUs were ever tested for HIV. The multivariate analysis revealed that having ever received drug treatment was positively

1  
2  
3  
4  
5 associated with HIV testing among both IDUs (adjusted odds ratio [AOR] 13.07; 95%  
6 confidence interval [CI]: 3.38-50.53) and NIDUs (AOR 3.58; 95%CI: 1.38-9.24). IDUs  
7 who were married (AOR 0.24; 95%CI: 0.06-0.94) and who injected twice daily (AOR  
8 0.30; 95%CI: 0.09-0.97) were less likely to test for HIV. Among NIDUs, those who  
9 belonged to Shan (AOR 0.30; 95%CI: 0.11-0.84) or Kachin (AOR 0.30; 95%CI: 0.10-  
10 0.87) ethnicities were less likely to test for HIV.

11  
12 **Conclusions** In this study, more IDUs underwent HIV testing than did NIDUs. Those  
13 who had ever received drug treatment were more likely to test for HIV in both IDUs and  
14 NIDUs. Integrating HIV testing into drug treatment and expanding drug treatment may  
15 be effective to increase HIV testing uptake among both IDUs and NIDUs in Myanmar.

16  
17  
18  
19  
20  
21  
22  
23  
24 **Key words:** HIV, drug users, diagnosis, Myanmar

## 25 26 27 28 29 30 31 32 33 34 35 36 37 **Introduction**

38 Myanmar is one of the countries hardest hit by the HIV epidemic in South-East Asia.

39  
40 According to UNAIDS, approximately 240,000 people were living with HIV/AIDS and

41  
42 HIV prevalence was 0.5% among the adult population in Myanmar at the end of 2011.<sup>1</sup>

43  
44 Injecting drug use is a primary mode of HIV transmission in the country. The estimated

45  
46 number of drug users in 2008 was 300,000-400,000, of whom 90,000-150,000 were

47  
48 injecting drug users (IDUs).<sup>2,3</sup> HIV prevalence among IDUs was 21.9 % in 2011.<sup>1</sup> To

49  
50 tackle this problem, Myanmar has actively promoted condom use, improved the

1  
2  
3  
4  
5  
6 management of sexually transmitted infections (STIs), and made access to HIV testing  
7  
8  
9 and counseling services widespread.

10  
11 HIV testing is a highly cost-effective intervention for HIV risk reduction and  
12  
13 transmission.<sup>4</sup> Early detection of HIV infection in individuals is essential to provide  
14  
15 HIV-related support, care, and treatment, and to prevent further spread of infection. In  
16  
17  
18 addition, HIV testing and counseling can increase knowledge of HIV/AIDS, reduce  
19  
20  
21 risky sexual and drug use behaviors, and prevent other STIs.<sup>5-9</sup> It is therefore important  
22  
23  
24 to encourage IDUs and non-injecting drug users (NIDUs) to be tested for HIV infection.  
25  
26  
27  
28

29 In Myanmar, both the government and international non-governmental  
30  
31 organizations (INGOs) are providing a variety of HIV testing services including  
32  
33 referrals and pre- and post-test counseling.<sup>10</sup> By the end of 2006, 289 service delivery  
34  
35  
36 points were providing HIV testing services in Myanmar – 53% implemented through  
37  
38  
39 the government sector, and 47% through INGOs.<sup>11</sup> However, HIV testing uptake has  
40  
41  
42 been a major challenge within the drug using populations. Due to varying levels of  
43  
44  
45 stigma and discrimination associated with drug use and its illegality, access to  
46  
47  
48 mainstream public health services is often limited in the drug using population.<sup>12</sup>  
49  
50  
51

52 In Myanmar, however, only limited information is available on the  
53  
54  
55 characteristics of both IDUs and NIDUs undergoing HIV testing. Therefore, the purpose  
56  
57  
58  
59  
60

1  
2  
3  
4  
5  
6 of this study was to identify the characteristics of IDUs and NIDUs who underwent HIV  
7  
8  
9 testing and to identify factors associated with testing uptake in Lashio Township,  
10  
11 Northern Shan State, Myanmar.  
12  
13

## 14 15 16 17 **Methods**

### 18 19 **Study design and area**

20  
21  
22 A cross-sectional study was conducted in Lashio city, Northern Shan State of Myanmar,  
23  
24 a small hill-town located close to the Chinese border. Data were collected in January  
25  
26 and February 2010. Lashio is one of the priority townships in Myanmar that has been  
27  
28 recommended for HIV interventions due to the high HIV prevalence among IDUs.  
29  
30  
31 IDUs' HIV prevalence in Lashio was 48.5 % in 2007,<sup>13</sup> while that among NIDUs was  
32  
33  
34 not available in Myanmar.  
35  
36  
37

### 38 39 **Study Participants**

40  
41 In this study, IDUs were defined as individuals who have visible signs of injection  
42  
43 and/or who injected drugs in the past 6 months. NIDUs were defined as those with no  
44  
45 history of injecting drug use and those who used drugs by a non-injecting route in the  
46  
47 past 6 months. Study participants were recruited using the following criteria: 1) male  
48  
49 IDUs and NIDUs, 2) aged 18 years or older, 3) had used drugs in the last 6 months, 4)  
50  
51 not suffering from a serious drug dependency and 5) able to speak Myanmar language.  
52  
53  
54  
55  
56  
57  
58  
59  
60

1  
2  
3  
4  
5  
6 A total of 176 IDUs and 217 NIDUs were enrolled in this study. Of them, 18 IDUs and  
7  
8  
9 7 NIDUs were excluded from analysis because of incomplete responses. The remaining  
10  
11  
12 participants, 158 IDUs and 210 NIDUs, were included in the present data analysis.  
13

### 14 15 16 17 **Sampling method**

18  
19  
20 A respondent-driven sampling (RDS) method was used to recruit a participant that is an  
21  
22 effective method to reach hidden population.<sup>14</sup> It uses dual incentives and a structured  
23  
24 coupon disbursement process of “peer referral” to reduce typical flaws inherent in  
25  
26 sampling of hidden populations’ related biases. The first respondent was recruited from  
27  
28 the pool of service-recipients at a local drop-in center. That successfully recruited  
29  
30 participant was then provided with three coupons with serial numbers and instructions  
31  
32 for passing those coupons to peers who were using drugs currently. Coupons were given  
33  
34 a 2-weeks expiration date. The second respondent was also recruited in the same way.  
35  
36  
37  
38  
39  
40  
41  
42  
43  
44  
45

46 All respondents recruited in this manner received an Information, Education and  
47  
48 Communication (IEC) pack that included 2 condoms with gel packs along with an  
49  
50 incentive of 2000 Kyats (US\$ 2.5) as compensation for their time and travel.  
51  
52

53 Respondents were eligible to receive a secondary incentive if recruits referred through  
54  
55  
56  
57  
58  
59  
60

1  
2  
3  
4  
5  
6 them showed up at study sites to participate within the expiry period of their recruitment  
7  
8  
9 coupons. The secondary incentive was 500 kyats (0.5\$) per recruitment.  
10

### 11 12 13 14 **Measures**

15  
16 The dependent variable was ever tested HIV. HIV testing behaviors' variables included  
17  
18 ever undergone an HIV test, HIV test frequency, date of HIV testing, and site of HIV  
19  
20 testing. The independent variables were socio-demographic characteristic, drug use,  
21  
22 sexual, HIV testing behaviors, and health service utilization behaviors of the  
23  
24  
25  
26  
27 participants.<sup>13 15</sup>  
28  
29  
30

31 The contents of the study questions were adapted from several different studies  
32  
33 in Myanmar. The socio-demographic characteristics, drug use behavior and health  
34  
35 services utilization questions were adapted from the Rapid Assessment and Response on  
36  
37 Drug Use and from the HIV Survey of the Asian Harm Reduction Network, Myanmar.<sup>15</sup>  
38  
39 Sexual behaviors and HIV testing behavior questions were adapted from the Behavioral  
40  
41 Surveillance Survey (BSS) Questionnaire of the Ministry of Health, Myanmar.<sup>13</sup> Pre-  
42  
43  
44  
45  
46  
47 testing of the full questionnaire used in this study was done in Lashio with 20 IDUs and  
48  
49  
50  
51 20 NIDUs before data collection.  
52  
53  
54  
55

### 56 **Data collection**

57  
58  
59  
60



1  
2  
3  
4  
5  
6 After obtaining written informed consent from each participant, the lead researcher and  
7  
8  
9 six trained interviewers conducted interviews for data collection. They interviewed the  
10  
11  
12 participants for 30-40 minutes for each in a private setting. Most interviews were  
13  
14  
15 conducted at a local drop-in center (DIC). The lead researcher and trained interviewers  
16  
17  
18 went to the field to recruit participants who were willing to participate in this study  
19  
20  
21 without coming to a DIC.  
22  
23  
24

### 25 **Data analysis**

26  
27  
28 Data were coded and entered using the Statistical Package for the Social Sciences  
29  
30  
31 (SPSS) version 16 (SPSS Inc., Chicago, IL, USA) for all analyses. Data analysis was  
32  
33  
34 carried out separately for IDUs and NIDUs. Descriptive statistics and  $\chi^2$  tests were used  
35  
36  
37 to compare background characteristics of the participants. Bivariate analyses were  
38  
39  
40 initially conducted to examine factors associated with HIV testing. Finally, all the  
41  
42  
43 covariates simultaneously entered into multiple regression model to calculate adjusted  
44  
45  
46 odds ratios (AORs), 95% confidence intervals (CIs), and corresponding *P*-values.  
47  
48  
49

### 50 **Ethical considerations**

51  
52  
53  
54 This study was approved by the Research Ethics Committee of the Graduate School of  
55  
56  
57 Medicine, the University of Tokyo, Japan and the Institutional Ethical Review  
58  
59  
60

1  
2  
3  
4  
5  
6 Committee, Department of Medical Research (Lower Myanmar), Ministry of Health,  
7  
8  
9 Yangon, Myanmar. The objectives of the study were made clear to respondents before  
10  
11 their voluntary participation and individual written informed consent was obtained from  
12  
13 all participants. Each participant was allowed to withdraw from the study at any time.  
14  
15  
16 Confidentiality of the entire data set was maintained at all stages of data collection and  
17  
18 analyses.  
19  
20  
21  
22  
23  
24

## 25 **Results**

### 26 **Socio-demographic and drug use characteristics**

27  
28 Table 1 presents socio-demographic characteristics of the IDUs and NIDUs. Of the 368  
29  
30 respondents, 158 participants were IDUs and 210 participants were NIDUs. The mean  
31  
32 age was significantly different between IDUs and NIDUs; 29.8 (SD 6.7) years for IDUs  
33  
34 and 25.5 (SD 5.8) years for NIDUs ( $P < 0.001$ ). Among IDUs, 48.7% were between 21-  
35  
36 30 years and 31.6% were between 31-40 years of age. Of the NIDUs, 63.8% were  
37  
38 between 21-30 years and 14.3% were between 31-40 years. With regard to education  
39  
40 levels, about a third of IDUs and NIDUs had primary or no formal education. Overall,  
41  
42 12.7% of IDUs and a significantly higher percentage of NIDUs (31.9%) had migrated to  
43  
44 Lashio from another part of Myanmar ( $P < 0.001$ ).  
45  
46  
47  
48  
49  
50  
51  
52  
53  
54  
55  
56

### 57 **Factors associated with HIV testing among injecting drug users (Table 2)**

1  
2  
3  
4  
5  
6 In total, 76.6 % of IDUs had ever tested for HIV. Bivariate analysis showed that those  
7  
8  
9 belonging to the older age group (odd ratio [OR] 2.57; 95% confidence interval [CI]:  
10  
11  
12 1.17-5.66) and those who had a regular job (OR 2.91; 95% CI: 1.26-6.70) were more  
13  
14 likely to have tested for HIV. Conversely, IDUs who practiced risky behaviors such as  
15  
16 using more than two kinds of drugs (poly drugs) (OR 0.40; 95% CI: 0.18-0.85) and  
17  
18 injecting drugs more than twice per day (OR 0.41; 95% CI: 0.19-0.88) were less likely  
19  
20 to have tested for HIV. Participants who had ever received drug treatment (OR 14.57;  
21  
22 95% CI: 5.82-36.47), who had ever registered as a drug user (OR 5.33; 2.25-12.62), and  
23  
24 who perceived themselves as being at risk of HIV infection (OR 3.57; 95% CI: 1.51-  
25  
26 8.43) were significantly more likely to have tested for HIV.  
27  
28  
29  
30  
31  
32  
33  
34

35 The multiple regression model for IDUs indicated that those who were married  
36  
37 (AOR 0.24; 95% CI: 0.06-0.94) and injected drugs twice daily (AOR 0.30; 95% CI:  
38  
39 0.09-0.97) were less likely to have tested for HIV. Meanwhile, IDUs having a regular  
40  
41 job (AOR 4.50; 95% CI: 1.08-23.17), who had received drug treatment (AOR 13.07;  
42  
43 95% CI: 3.38-50.53), and perceived themselves as being at risk of HIV (AOR 5.70;  
44  
45 95% CI: 1.40-23.25) were more likely to have undergone HIV testing.  
46  
47  
48  
49  
50  
51

### 52 **Factors associated with HIV testing among non-injecting drug users (Table 3)**

53  
54

55 Nearly half of NIDUs (45.7%) had ever tested for HIV. Being of Shan (OR 0.28; 95%  
56  
57  
58  
59  
60

1  
2  
3  
4  
5  
6 CI: 0.12-0.62) or Kachin (OR 0.21; 95% CI: 0.09-0.49) ethnicity, reporting poly drug  
7  
8  
9 use (OR 0.40; 95% CI: 0.21-0.74), and having visited a female sex worker within the  
10  
11 last 3 months (OR 0.50; 95% CI: 0.29-0.88) were negatively associated with HIV  
12  
13 testing. Conversely, NIDUs who had ever received drug treatment (OR 2.73; 95% CI:  
14  
15 1.51-4.92), had ever registered as a drug user (OR 3.48; 95% CI: 1.61-7.49), and who  
16  
17 perceived themselves at being at risk of HIV infection (OR 3.29; 95% CI: 1.86-5.83)  
18  
19 were more likely to have tested for HIV.  
20  
21  
22  
23  
24

25  
26 In the multiple regression model for NIDUs, individuals who were of Shan  
27  
28 (AOR 0.30; 95% CI: 0.11-0.84) or Kachin (AOR 0.30; 95% CI: 0.10-0.87) ethnicity and  
29  
30 who reported poly drug use within the last three months (AOR 0.33; 95% CI: 0.14-0.77)  
31  
32 were less likely to have tested for HIV. Similar results as were observed among IDUs  
33  
34 were observed among NIDUs, too. NIDUs who had ever received drug treatment (AOR  
35  
36 3.58; 95% CI: 1.38-9.24), ever registered as a drug user (AOR 4.38; 95% CI: 1.31-  
37  
38 14.65), and who perceived themselves as at risk of HIV (AOR 4.46; 95% CI: 2.06-9.65)  
39  
40 were more likely to have tested for HIV.  
41  
42  
43  
44  
45  
46  
47  
48  
49  
50  
51

## 52 Discussion

53  
54  
55 This is the first study to identify the factors associated with HIV testing uptake among  
56  
57  
58  
59  
60

1  
2  
3  
4  
5  
6 IDUs and NIDUs in Lashio, where HIV prevalence among IDUs was one of the highest  
7  
8  
9 in Myanmar.<sup>13</sup> IDUs' HIV testing rate was higher compared to that of NIDUs' where  
10  
11 harm reduction programs were implemented, especially where such programs targeted  
12  
13 IDUs. Among IDUs, 76.6% had ever tested for HIV, while 45.7% of NIDUs had ever  
14  
15 tested for HIV. These percentages are much higher compared to one-year testing rates  
16  
17 reported among Italian drug users: 37.4% for IDUs and 28% for NIDUs.<sup>16</sup>  
18  
19  
20  
21  
22

23 HIV testing was positively associated with ever received drug treatment and  
24  
25 perception of personal risk of HIV infection among both IDUs and NIDUs. IDUs who  
26  
27 had a regular job at the time of survey were also more likely to have undergone HIV  
28  
29 testing. Married IDUs and IDUs who injected more than twice daily, meanwhile, were  
30  
31 less likely to have undergone HIV testing. Among NIDUs, those who had ever  
32  
33 registered as a drug user were more likely to have undergone HIV testing. NIDUs of  
34  
35 Shan or Kachin ethnicity and who reported poly drug use within the last three months  
36  
37 were less likely to have undergone HIV testing.  
38  
39  
40  
41  
42  
43  
44  
45

46 Notably, both IDUs and NIDUs who had ever received drug treatment were  
47  
48 more likely to have been tested for HIV. In Vietnam, female sex workers who spent time  
49  
50 in a rehabilitation center were more likely to have tested for HIV.<sup>17</sup> Also in Italy, IDUs  
51  
52 who had ever received both pharmacological and psychological treatments were more  
53  
54  
55  
56  
57  
58  
59  
60

1  
2  
3  
4  
5  
6 likely to have tested for HIV than were those who underwent only one kind of  
7  
8 treatment.<sup>16</sup>  
9

10  
11 Drug treatment is playing an important role to reduce risk of HIV infection  
12  
13 among both drug users.<sup>18</sup> However, HIV testing is not currently a compulsory service at  
14  
15 drug treatment centers in Myanmar unless a drug user undergoing detoxification  
16  
17 requests it. Since HIV testing and counseling effectively reduce risk behaviors in drug  
18  
19 using populations, the United States Centers for Disease Control and Prevention  
20  
21 recommends that HIV testing should be integrated into drug treatment services.<sup>18</sup>  
22  
23  
24  
25  
26  
27  
28  
29 Expanding drug treatment to incorporate HIV testing services may increase the number  
30  
31 of IDUs and NIDUs accessing HIV testing services in Myanmar, too.  
32  
33

34  
35 Within both types of drug users, those who had engaged in risk behaviors were  
36  
37 less likely to have tested for HIV. Both IDUs who injected twice daily and NIDUs who  
38  
39 used more than two drugs (poly drug use) were less likely to have been tested for HIV.  
40  
41  
42  
43 It is not surprising that the drug users are more prone to feeling afraid of receiving HIV  
44  
45 testing results due to their risky behaviors.<sup>19</sup>  
46  
47  
48

49  
50 In this study, perceived risk of HIV infection was a significant predictor for  
51  
52 HIV testing among both drug users. They may perceive themselves as at risk of HIV  
53  
54 infection because they learn their partner's HIV status<sup>20</sup> or may weigh the implications  
55  
56  
57  
58  
59  
60

1  
2  
3  
4  
5  
6 of their risky drugs use and sexual behaviors.<sup>21</sup> In this study, we did not confirm  
7  
8  
9 participants' HIV status due to ethical considerations. Regardless of HIV status and risk  
10  
11  
12 behaviors, perceived risk of HIV infection is a self-protective behavior which can  
13  
14  
15 motivate individuals to practice safer behaviors.

16  
17  
18 This study showed that IDUs who had a regular job were more likely to have  
19  
20  
21 been tested for HIV infection. The possible reason for this is that Myanmar National  
22  
23  
24 AIDS Programs included workplace as a priority setting for HIV/AIDS  
25  
26  
27 intervention/prevention program.<sup>22</sup> Thus, IDUs who had a regular job have been tested  
28  
29  
30 for HIV infection through those programs. On the other hand, conflicting findings found  
31  
32  
33 among Russian IDUs<sup>23</sup> and tuberculosis patients from Uganda<sup>24</sup> and Ethiopia.<sup>25</sup> In  
34  
35  
36 these studies, unemployed or part-time workers were more likely to test for HIV than  
37  
38  
39 employed or full time workers.

40  
41 In the present study, married IDUs were less likely to have been tested for HIV  
42  
43  
44 than single IDUs. This is an important finding since two-fifths of all new HIV infections  
45  
46  
47 in Myanmar occurred through husband-to-wife transmission in 2010 and the trend of  
48  
49  
50 husband-to-wife transmission is estimated to increase to nearly half of all new  
51  
52  
53 infections among women by 2015.<sup>26</sup> HIV testing programs urgently need to focus on  
54  
55  
56 encouraging married IDUs to undergo HIV testing. In China, too, married men who  
57  
58  
59  
60

1  
2  
3  
4  
5  
6 have sex with men (MSM) were less likely to have been tested for HIV.<sup>27</sup>  
7  
8

9 NIDUs who registered as drug users in the Government facilities were more  
10  
11 likely to have been tested for HIV. Encouraging drug users to register as drug users may  
12  
13 be effective to increase the uptake of HIV testing services among NIDUs. Nevertheless,  
14  
15 most of the drug users were reluctant to register as a drug user due to several barriers,  
16  
17 including stigma toward drug addicts, financial problems<sup>28</sup>, fear of being known as a  
18  
19 drug user, perceived low efficacy of available treatment, and the possibility of losing  
20  
21 employment opportunities.<sup>29 30</sup>  
22  
23  
24  
25  
26  
27  
28

29 Another important finding was that NIDUs who were of Shan or Kachin  
30  
31 ethnicities were less likely to have tested their HIV status than were those of Burma  
32  
33 ethnicity. It may be because most of the IEC materials, HIV testing information, and  
34  
35 HIV counseling services were conducted in Myanmar language, which Shan and Kachin  
36  
37 ethnicities were not always familiar with. Participants who do not speak or read  
38  
39 Myanmar language may have had difficulty in accessing HIV testing services. If HIV  
40  
41 testing services were offered in other languages for minorities such as Shan and Kachin,  
42  
43 they would be better able to make use of those services.  
44  
45  
46  
47  
48  
49  
50

51  
52 Our findings are derived from a cross-sectional study, and several possible  
53  
54 limitations of these findings should be noted. First, HIV testing was self-reported by  
55  
56  
57  
58  
59  
60



1  
2  
3  
4  
5  
6 drug users, and we were not able to confirm their HIV status. Second, our results may  
7  
8  
9 not be generalized to drug users in other cities, as both IDUs and NIDUs from other  
10  
11  
12 parts of Myanmar may have different characteristics than those in Lashio. Despite these  
13  
14  
15 potential limitations, these results present the first look at HIV testing behaviors among  
16  
17  
18 drug users in Lashio, the famous border trade city with a high burden of HIV infection.  
19  
20  
21 Further research is needed to understand barriers and decisions to access HIV testing  
22  
23  
24 among drug users especially for those who are married and engaged in risk behaviors.

### 25 26 **Conclusions**

27  
28  
29 Both IDUs and NIDUs who had ever received drug treatment were more likely to have  
30  
31  
32 tested for HIV. More IDUs received HIV testing compared to NIDUs. Low HIV testing  
33  
34  
35 rates were found among IDUs who were married and who injected twice per day and  
36  
37  
38 among NIDUs reporting poly drug use within the last three months and who were of  
39  
40  
41 Kachin or Shan ethnicity. To increase HIV testing rate especially among NIDUs, we  
42  
43  
44 need to encourage them to register as a drug users and providing them with HIV  
45  
46  
47 services in Myanmar language as well as in ethnic languages. Integrating HIV testing  
48  
49  
50 into drug treatment and expanding drug treatment services is an effective way to  
51  
52  
53 increase utilization of HIV testing among both types of drug users in Myanmar.

### 54 55 **Acknowledgments**

56 The authors would like to thanks all the participants who voluntarily participated in this  
57  
58  
59

1  
2  
3  
4  
5 study. We also would like to thanks Dr. Yin Thet Nu Oo and Dr. Lin Aung Thu for their  
6 support and contribution.  
7

#### 8 **Funding:**

9  
10 This study has received funding from the University of Tokyo and the ITO foundation  
11 (G 0114) of Tokyo.  
12

#### 13 **Competing interests:**

14 None.

#### 15 **Ethical approval**

16  
17 The study was approved by the Research Ethics Committee of the Graduate School of  
18 Medicine, the University of Tokyo, Japan and the Institutional Ethical Review  
19 Committee, Department of Medical Research (Lower Myanmar), Ministry of Health,  
20 Yangon, Myanmar.  
21

#### 22 **Provenance and peer review**

23 Not commissioned; externally peer reviewed.  
24

#### 25 **Data sharing statement**

26 Extra data are available from the corresponding author.  
27

#### 28 **Contributing authors:**

29  
30 Yu Mon Saw and Junko Yasuoka participated in the design of the study, conducted the  
31 statistical analyses, and drafted the article. Krishna C. Poudel participated in the  
32 analysis and the interpreted the results. Yu Mon Saw, Thu Nandar Saw and Soe Tun  
33 oversaw the implementation of study. Masamine Jimba supervised the study and the  
34 revisions to the article. All authors contributed to the writing of the manuscript and  
35 approved the final manuscript.  
36  
37  
38  
39

#### 40 **References**

- 41  
42  
43 1. Ministry of Health (MOH), National AIDS Programme. *Global AIDS Response*  
44 *Progress Report Myanmar*. Myanmar. 2012.  
45  
46 2. Soe ZN. Female Drug Users and Services' Accessibility in Burma (Myanmar):  
47 *NIDA International Drug Abuse Research Abstract Database*, 2010.(accessed 23  
48 May 2012)  
49  
50 3. Aceijas C, Friedman SR, Cooper HL, *et al*. Estimates of injecting drug users at  
51 the national and local level in developing and transitional countries, and gender  
52 and age distribution. *Sex Transm Infect*. Jun 2006;82 Suppl 3:iii10-17.  
53  
54 4. Sweat M, Gregorich S, Sangiwa G, *et al*. Cost-effectiveness of voluntary HIV-1  
55 counselling and testing in reducing sexual transmission of HIV-1 in Kenya and  
56  
57  
58  
59  
60

- 1  
2  
3  
4  
5  
6  
7  
8  
9  
10  
11  
12  
13  
14  
15  
16  
17  
18  
19  
20  
21  
22  
23  
24  
25  
26  
27  
28  
29  
30  
31  
32  
33  
34  
35  
36  
37  
38  
39  
40  
41  
42  
43  
44  
45  
46  
47  
48  
49  
50  
51  
52  
53  
54  
55  
56  
57  
58  
59  
60
- Tanzania. *Lancet*. Jul 8 2000;356:113-121.
5. Bernstein E, Heeren T, Winter M, *et al*. Long-term follow-up after voluntary human immunodeficiency virus/sexually transmitted infection counseling, point-of-service testing, and referral to substance abuse treatment from the emergency department. *Acad Emerg Med*. Apr 2012;19:386-395.
  6. Chen HT, Liang S, Liao Q, *et al*. HIV voluntary counseling and testing among injection drug users in south China: a study of a non-government organization based program. *AIDS Behav*. Sep 2007;11:778-788.
  7. Kamb ML, Fishbein M, Douglas JM, Jr., *et al*. Efficacy of risk-reduction counseling to prevent human immunodeficiency virus and sexually transmitted diseases: a randomized controlled trial. Project RESPECT Study Group. *JAMA*. Oct 7 1998;280:1161-1167.
  8. Shain RN, Piper JM, Newton ER, *et al*. A randomized, controlled trial of a behavioral intervention to prevent sexually transmitted disease among minority women. *N Engl J Med*. Jan 14 1999;340:93-100.
  9. Grusky O, Liu H, Li X, *et al*. Is voluntary counselling and testing of drug users in China feasible? *Int J STD AIDS*. May 2006;17:354-355.
  10. UNAIDS. *Fund for HIV/AIDS in Myanmar: Annual Progress Report, 2006-2007. The Joint United Nations Programme on HIV/AIDS, Myanmar*. 2007.
  11. Thwe M. Service coverage for HIV and AIDS in Myanmar *The 8th International Congress on AIDS in Asia and the Pacific (ICAAP)*. Colombo, Sri Lanka.2007.
  12. Qian HZ, Schumacher JE, Chen HT, *et al*. Injection drug use and HIV/AIDS in China: review of current situation, prevention and policy implications. *Harm Reduct J*. 2006;3:4.
  13. Ministry of Health (MOH), National AIDS Programme, Myanmar. *Behavioral Surveillance Survey among Injecting Drug Users and Female Sex Workers*, 2008.
  14. Heckathorn DD. Respondent-Driven Sampling: A New Approach to the Study of Hidden Populations. *Social Problems*. 1997;44:174-199.
  15. De Maere W, Singh S, Tun T, *et al*. Rapid Assessment and Action research on drug use and HIV in Lashio, Northern Shan State, Myanmar: *Asian Harm Reduction Network, Myanmar (AHRN-Myanmar)*. 2006.
  16. Camoni L, Federico B, Capelli G, *et al*. Few Italian drug users undergo HIV testing. *AIDS Behav*. May 2011;15:711-717.
  17. Grayman JH, Nhan DT, Huong PT, *et al*. Factors associated with HIV testing, condom use, and sexually transmitted infections among female sex workers in Nha Trang, Vietnam. *AIDS Behav*. Mar 2005;9:41-51.

- 1
  - 2
  - 3
  - 4
  - 5
  - 6
  - 7
  - 8
  - 9
  - 10
  - 11
  - 12
  - 13
  - 14
  - 15
  - 16
  - 17
  - 18
  - 19
  - 20
  - 21
  - 22
  - 23
  - 24
  - 25
  - 26
  - 27
  - 28
  - 29
  - 30
  - 31
  - 32
  - 33
  - 34
  - 35
  - 36
  - 37
  - 38
  - 39
  - 40
  - 41
  - 42
  - 43
  - 44
  - 45
  - 46
  - 47
  - 48
  - 49
  - 50
  - 51
  - 52
  - 53
  - 54
  - 55
  - 56
  - 57
  - 58
  - 59
  - 60
18. Centers for Disease Control and Prevention(CDC).Linking HIV prevention services and substance abuse treatment programs.United State, 2002.
19. Spielberg F, Kurth A, Gorbach PM, *et al.* Moving from apprehension to action: HIV counseling and testing preferences in three at-risk populations. *AIDS Educ Prev.* Dec 2001;13:524-540.
20. Adih WK, Alexander CS. Determinants of condom use to prevent HIV infection among youth in Ghana. *J Adolesc Health.* Jan 1999;24:63-72.
21. Filipe EM, Batistella E, Pine A, *et al.* Sexual orientation, use of drugs and risk perception among HIV-positive men in Sao Paulo, Brazil. *Int J STD AIDS.* Jan 2005;16:56-60.
22. Ministry of Health (MOH),National AIDS Programme,Myanmar.*UNGASS Country Progress Report Myanmar*; 2010.
23. Niccolai LM, Toussova OV, Verevchkin SV, *et al.* High HIV prevalence, suboptimal HIV testing, and low knowledge of HIV-positive serostatus among injection drug users in St. Petersburg, Russia. *AIDS Behav.* Aug 2010;14:932-941.
24. Sendagire I, Schreuder I, Mubiru M, *et al.* Low HIV testing rates among tuberculosis patients in Kampala, Uganda. *BMC Public Health.* 2010;10:177.
25. Jerene D, Endale A, Lindtjorn B. Acceptability of HIV counselling and testing among tuberculosis patients in south Ethiopia. *BMC Int Health Hum Rights.* 2007;7:4.
26. Myat K. Rise in husband-to-wife HIV infections expected: NGOs. Available from <http://www.mmtimes.com/2010/news/545/54515news.html>. *The Myanmar Times* 2010. (accessed 23 May 2012)
27. Wei C, Ruan S, Zhao J, *et al.* Which Chinese men who have sex with men miss out on HIV testing? *Sex Transm Infect.* Apr 2011;87:225-228.
28. Appel PW, Ellison AA, Jansky HK, *et al.* Barriers to enrollment in drug abuse treatment and suggestions for reducing them: opinions of drug injecting street outreach clients and other system stakeholders. *Am J Drug Alcohol Abuse.* 2004;30:129-153.
29. Bobrova N, Rhodes T, Power R, *et al.* Barriers to accessing drug treatment in Russia: a qualitative study among injecting drug users in two cities. *Drug Alcohol Depend.* Apr 2006;82 Suppl 1:S57-63.
30. Tucker JA. Resolving problems associated with alcohol and drug misuse: understanding relations between addictive behavior change and the use of services. *Subst Use Misuse.* Sep 2001;36:1501-1518.

1  
2  
3  
4  
5  
6  
7  
8  
9  
10 “The Corresponding Author has the right to grant on behalf of all authors and does grant  
11 on behalf of all authors, an exclusive licence (or non-exclusive for government  
12 employees) on a worldwide basis to the BMJ Group and co-owners or contracting  
13 owning societies (where published by the BMJ Group on their behalf), and its Licensees  
14 to permit this article (if accepted) to be published in Sexually Transmitted Infections  
15 and any other BMJ Group products and to exploit all subsidiary rights, as set out in our  
16 licence.”  
17  
18  
19  
20  
21  
22  
23  
24  
25  
26  
27  
28  
29  
30  
31  
32  
33  
34  
35  
36  
37  
38  
39  
40  
41  
42  
43  
44  
45  
46  
47  
48  
49  
50  
51  
52  
53  
54  
55  
56  
57  
58  
59  
60

1  
2  
3  
4  
5  
6  
7  
8  
9  
10  
11  
12  
13  
14  
15  
16  
17  
18  
19  
20  
21  
22  
23  
24  
25  
26  
27  
28  
29  
30  
31  
32  
33  
34  
35  
36  
37  
38  
39  
40  
41  
42  
43  
44  
45  
46  
47  
48  
49  
50  
51  
52  
53  
54  
55  
56  
57  
58  
59  
60

**Table.1 Socio-demographic characteristics of participants (N=368)**

| Characteristics                          | Injecting drug user (n=158) |        | Non-injecting drug user (n=210) |        | P-value |
|------------------------------------------|-----------------------------|--------|---------------------------------|--------|---------|
|                                          | n/mean                      | %/SD   | n/mean                          | %/SD   |         |
| Age                                      | 29.8                        | 7.2    | 25.5                            | 5.8    | <0.001  |
| <=20                                     | 17                          | (10.8) | 40                              | (19.0) |         |
| 21-30                                    | 77                          | (48.7) | 134                             | (63.8) |         |
| 31-40                                    | 50                          | (31.6) | 30                              | (14.3) |         |
| 41-50                                    | 14                          | (8.9)  | 6                               | (2.9)  |         |
| Ethnicity                                |                             |        |                                 |        | 0.943   |
| Burma                                    | 35                          | (22.2) | 45                              | (21.4) |         |
| Shan                                     | 46                          | (29.1) | 66                              | (31.4) |         |
| Kachin                                   | 35                          | (22.2) | 48                              | (22.9) |         |
| Others                                   | 42                          | (26.5) | 51                              | (24.3) |         |
| Marital status                           |                             |        |                                 |        | 0.137   |
| Single                                   | 75                          | (47.5) | 110                             | (52.4) |         |
| Married                                  | 66                          | (41.8) | 68                              | (32.4) |         |
| Divorced/Widower/Seperated               | 17                          | (10.7) | 32                              | (15.2) |         |
| Education                                |                             |        |                                 |        | 0.227   |
| Primary/No formal education              | 52                          | (32.9) | 61                              | (29.0) |         |
| Secondary education                      | 58                          | (36.7) | 67                              | (31.9) |         |
| High school and higher education         | 48                          | (30.4) | 82                              | (39.0) |         |
| Employment status                        |                             |        |                                 |        | 0.315   |
| Non-regular job                          | 32                          | (20.3) | 34                              | (16.2) |         |
| Regular job                              | 126                         | (79.7) | 176                             | (83.8) |         |
| Living status (Inter-regional migration) |                             |        |                                 |        | <0.001  |
| Resident                                 | 138                         | (87.3) | 143                             | (68.1) |         |
| Migrant                                  | 20                          | (12.7) | 67                              | (31.9) |         |

Mean age 29.8 (SD 7.2) for IDUs and 25.5 (SD 25.5) for NIDUs

1  
2  
3  
4  
5  
6  
7  
8  
9  
10  
11  
12  
13  
14  
15  
16  
17  
18  
19  
20  
21  
22  
23  
24  
25  
26  
27  
28  
29  
30  
31  
32  
33  
34  
35  
36  
37  
38  
39  
40  
41  
42  
43  
44  
45  
46  
47  
48  
49  
50  
51  
52  
53  
54  
55  
56  
57  
58  
59  
60

|                                                                      | N   | %    | OR    | 95%CI        | AOR   | 95%CI         |
|----------------------------------------------------------------------|-----|------|-------|--------------|-------|---------------|
| <b>Age</b>                                                           |     |      |       |              |       |               |
| ≤ 29                                                                 | 68  | 43.0 |       |              |       |               |
| > 29                                                                 | 90  | 57.0 | 2.57  | 1.17-5.66*   | 2.06  | 0.63-6.76     |
| <b>Marital status</b>                                                |     |      |       |              |       |               |
| Single                                                               | 75  | 47.4 |       |              |       |               |
| Married                                                              | 66  | 41.8 | 0.61  | 0.28-1.35    | 0.24  | 0.06-0.94*    |
| Divorced/Widower                                                     | 17  | 10.8 | 0.55  | 0.17-1.82    | 0.26  | 0.04-1.94     |
| <b>Education</b>                                                     |     |      |       |              |       |               |
| Primary/No formal education                                          | 61  | 29.0 |       |              |       |               |
| Secondary education                                                  | 67  | 31.9 | 1.57  | 0.64-3.86    | 2.59  | 0.63-10.60    |
| High school or above                                                 | 82  | 39.1 | 1.11  | 0.45-2.71    | 1.82  | 0.29-4.86     |
| <b>Ethnicity</b>                                                     |     |      |       |              |       |               |
| Burma                                                                | 35  | 22.2 |       |              |       |               |
| Shan                                                                 | 46  | 29.0 | 0.93  | 0.27-3.22    | 2.15  | 0.32-14.57    |
| Kachin                                                               | 35  | 22.2 | 0.22  | 0.07-0.71*   | 0.58  | 0.11-2.94     |
| Others                                                               | 42  | 26.6 | 0.53  | 0.16-1.74    | 0.83  | 0.16-4.27     |
| <b>Employment status</b>                                             |     |      |       |              |       |               |
| Non-regular job                                                      | 32  | 20.3 |       |              |       |               |
| Regular job                                                          | 126 | 79.7 | 2.91  | 1.26-6.70*   | 4.50  | 1.08-23.17*   |
| <b>Living status (Inter-regional migration)</b>                      |     |      |       |              |       |               |
| Migrant                                                              | 20  | 12.7 |       |              |       |               |
| Resident                                                             | 138 | 87.3 | 0.80  | 0.25-2.55    | 0.81  | 0.14-4.81     |
| <b>Most used drug type in the past 3 months</b>                      |     |      |       |              |       |               |
| Heroin                                                               | 156 | 98.7 | S/S   |              | S/S   |               |
| Stimulant and others                                                 | 2   | 1.3  |       |              |       |               |
| <b>Had history of poly drug use in the past 3 months</b>             |     |      |       |              |       |               |
| Never                                                                | 83  | 52.5 |       |              |       |               |
| Ever                                                                 | 75  | 47.5 | 0.40  | 0.18-0.85*   | 0.44  | 0.14-1.43     |
| <b>Had history of unsafe injection practice in the past 3 months</b> |     |      |       |              |       |               |
| No                                                                   | 107 | 52.5 |       |              |       |               |
| Yes                                                                  | 51  | 47.5 | 1.72  | 0.76-3.86    | 1.01  | 0.27-3.84     |
| <b>Frequency of injection per day</b>                                |     |      |       |              |       |               |
| ≤ 2                                                                  | 86  | 54.4 |       |              |       |               |
| > 2                                                                  | 72  | 45.6 | 0.41  | 0.19-0.88*   | 0.30  | 0.09-0.97*    |
| <b>Had history of FSW visit in the past 3 months</b>                 |     |      |       |              |       |               |
| Never                                                                | 73  | 46.2 |       |              |       |               |
| Ever                                                                 | 85  | 53.8 | 0.74  | 0.35-1.56    | 1.34  | 0.25-7.12     |
| <b>Sexual orientation</b>                                            |     |      |       |              |       |               |
| Hetero-sexual                                                        | 135 | 85.4 |       |              |       |               |
| Bi/Homo-sexual                                                       | 23  | 14.6 | 0.21  | 0.08-0.53**  | 0.61  | 0.13-2.84     |
| <b>Had more than one partners in the past 3 months</b>               |     |      |       |              |       |               |
| No                                                                   | 73  | 46.2 |       |              |       |               |
| Yes                                                                  | 85  | 53.8 | 0.40  | 0.18-0.89*   | 0.20  | 0.04-1.11     |
| <b>Ever received drug treatment</b>                                  |     |      |       |              |       |               |
| No                                                                   | 31  | 19.6 |       |              |       |               |
| Yes                                                                  | 127 | 80.4 | 14.57 | 5.82-36.47** | 13.07 | 3.38-50.53*** |
| <b>Ever register as a drug user</b>                                  |     |      |       |              |       |               |
| No                                                                   | 78  | 49.4 |       |              |       |               |
| Yes                                                                  | 80  | 50.6 | 5.33  | 2.25-12.62** | 2.21  | 0.57-8.63     |
| <b>Ever been in prison or jail</b>                                   |     |      |       |              |       |               |
| No                                                                   | 106 | 67.1 |       |              |       |               |
| Yes                                                                  | 52  | 32.9 | 0.56  | 0.26-1.19    | 0.44  | 0.10-1.84     |
| <b>Perceived HIV risk</b>                                            |     |      |       |              |       |               |
| No                                                                   | 90  | 57.0 |       |              |       |               |
| Yes                                                                  | 68  | 43.9 | 3.57  | 1.51-8.43**  | 5.70  | 1.40-23.25*   |

Note. OR: odd Ratio; CI: confidence interval; AOR: adjusted odd ratio; FSW: female sex worker  
\* p <0.05; \*\* p <0.01; \*\*\* p <0.001; S/S=small sample size

1  
2  
3  
4  
5  
6  
7  
8  
9  
10  
11  
12  
13  
14  
15  
16  
17  
18  
19  
20  
21  
22  
23  
24  
25  
26  
27  
28  
29  
30  
31  
32  
33  
34  
35  
36  
37  
38  
39  
40  
41  
42  
43  
44  
45  
46  
47  
48  
49  
50  
51  
52  
53  
54  
55  
56  
57  
58  
59  
60

|                                                          | N   | %    | OR   | 95%CI       | AOR  | 95%CI        |
|----------------------------------------------------------|-----|------|------|-------------|------|--------------|
| <b>Age</b>                                               |     |      |      |             |      |              |
| ≤ 25                                                     | 116 | 55.2 |      |             |      |              |
| > 25                                                     | 94  | 44.8 | 1.17 | 0.68-2.02   | 0.75 | 0.33-1.71    |
| <b>Marital status</b>                                    |     |      |      |             |      |              |
| Single                                                   | 110 | 52.4 |      |             |      |              |
| Married                                                  | 68  | 32.4 | 0.62 | 0.33-1.15   | 0.52 | 0.22-1.21    |
| Divorced/Widower                                         | 32  | 15.2 | 0.88 | 0.40-1.94   | 0.39 | 0.13-1.18    |
| <b>Education</b>                                         |     |      |      |             |      |              |
| Primary/No formal education                              | 52  | 32.9 |      |             |      |              |
| Secondary education                                      | 58  | 36.7 | 2.04 | 1.01-4.13   | 2.38 | 0.95-5.97    |
| High school or above                                     | 48  | 30.4 | 1.29 | 0.66-2.55   | 1.48 | 0.58-3.77    |
| <b>Ethnicity</b>                                         |     |      |      |             |      |              |
| Burma                                                    | 45  | 21.4 |      |             |      |              |
| Shan                                                     | 66  | 31.4 | 0.28 | 0.12-0.62*  | 0.30 | 0.11-0.84*   |
| Kachin                                                   | 48  | 22.9 | 0.21 | 0.09-0.49** | 0.30 | 0.10-0.87*   |
| Others                                                   | 51  | 24.3 | 0.43 | 0.19-1.00   | 0.52 | 0.18-1.49    |
| <b>Employment status</b>                                 |     |      |      |             |      |              |
| Non-regular job                                          | 34  | 16.2 |      |             |      |              |
| Regular job                                              | 176 | 83.8 | 1.67 | 0.78-3.59   | 1.35 | 0.44-4.14    |
| <b>Living status (Inter-regional migration)</b>          |     |      |      |             |      |              |
| Migrant                                                  | 67  | 31.9 |      |             |      |              |
| Resident                                                 | 143 | 68.1 | 0.52 | 0.29-0.94*  | 0.55 | 0.26-1.17    |
| <b>Most used drug type in the past 3 months</b>          |     |      |      |             |      |              |
| Heroin                                                   | 87  | 41.4 |      |             |      |              |
| Stimulant and others                                     | 123 | 58.6 | 1.15 | 0.66-2.00   | 1.54 | 0.63-3.79    |
| <b>Had history of poly drug use in the past 3 months</b> |     |      |      |             |      |              |
| Never                                                    | 58  | 27.6 |      |             |      |              |
| Ever                                                     | 152 | 72.4 | 0.40 | 0.21-0.74*  | 0.33 | 0.14-0.77**  |
| <b>Had history of FSW visit in the past 3 months</b>     |     |      |      |             |      |              |
| Never                                                    | 80  | 38.1 |      |             |      |              |
| Ever                                                     | 130 | 61.9 | 0.50 | 0.29-0.88*  | 0.63 | 0.30-1.33    |
| <b>Sexual orientation</b>                                |     |      |      |             |      |              |
| Hetero-sexual                                            | 76  | 36.2 |      |             |      |              |
| Bi/Homo-sexual                                           | 134 | 63.8 | 1.77 | 0.99-3.14   | 1.72 | 0.73-4.03    |
| <b>Had more than one partners in the past 3 months</b>   |     |      |      |             |      |              |
| No                                                       | 35  | 16.7 |      |             |      |              |
| Yes                                                      | 175 | 83.3 | 0.87 | 0.42-1.80   | 0.80 | 0.27-2.38    |
| <b>Ever received drug treatment</b>                      |     |      |      |             |      |              |
| No                                                       | 139 | 66.2 |      |             |      |              |
| Yes                                                      | 71  | 33.8 | 2.73 | 1.51-4.92** | 3.58 | 1.38-9.24**  |
| <b>Ever register as a drug user</b>                      |     |      |      |             |      |              |
| No                                                       | 173 | 82.4 |      |             |      |              |
| Yes                                                      | 37  | 17.6 | 3.48 | 1.61-7.49** | 4.38 | 1.31-14.65** |
| <b>Ever been in prison or jail</b>                       |     |      |      |             |      |              |
| No                                                       | 174 | 82.9 |      |             |      |              |
| Yes                                                      | 36  | 17.1 | 1.08 | 0.52-2.21   | 1.28 | 0.35-4.65    |
| <b>Perceived HIV risk</b>                                |     |      |      |             |      |              |
| No                                                       | 120 | 57.1 |      |             |      |              |
| Yes                                                      | 90  | 42.9 | 3.29 | 1.86-5.83*  | 4.46 | 2.06-9.65*** |

Note. OR: odd Ratio; CI: confidence interval; AOR: adjusted odd ratio; FSW: female sex worker  
\* p <0.05; \*\* p <0.01; \*\*\* p <0.001; S/S=small sample size



STROBE 2007 (v4) Statement—Checklist of items that should be included in reports of *cross-sectional studies*

| Section/Topic        | Item # | Recommendation                                                                                                                                                                                                                                                                                                                                                                                                                                                                                                                                                                                                                                                                                                                                                                                                                                                                                                                                                                                                                                                                                                                                                                                                                                                                                                                                                                                                                                        | Reported on page # |
|----------------------|--------|-------------------------------------------------------------------------------------------------------------------------------------------------------------------------------------------------------------------------------------------------------------------------------------------------------------------------------------------------------------------------------------------------------------------------------------------------------------------------------------------------------------------------------------------------------------------------------------------------------------------------------------------------------------------------------------------------------------------------------------------------------------------------------------------------------------------------------------------------------------------------------------------------------------------------------------------------------------------------------------------------------------------------------------------------------------------------------------------------------------------------------------------------------------------------------------------------------------------------------------------------------------------------------------------------------------------------------------------------------------------------------------------------------------------------------------------------------|--------------------|
| Title and abstract   | 1      | <b>(a) Indicate the study's design with a commonly used term in the title or the abstract</b><br>A cross-sectional study that indentified factors associated with HIV testing among injecting (IDU) and non-injecting drug users (NIDUs).                                                                                                                                                                                                                                                                                                                                                                                                                                                                                                                                                                                                                                                                                                                                                                                                                                                                                                                                                                                                                                                                                                                                                                                                             | 1                  |
|                      |        | <b>(b) Provide in the abstract an informative and balanced summary of what was done and what was found</b><br>HIV testing is an effective intervention for reducing HIV risk. However, uptake of HIV testing is a major challenge within the drug-using population due to their illegal drug use behaviours. This study aimed to identify factors associated with HIV testing among IDUs and NIDUs in Lashio, Myanmar. A cross-sectional study was conducted from January to February 2010. In total, 158 male IDUs and 210 male NIDUs were recruited using a respondent-driven sampling method. A multivariate analysis was performed separately for IDUs and NIDUs. In this study, more IDUs underwent HIV testing than did NIDUs. The multivariate analysis revealed that having ever received drug treatment was positively associated with HIV testing among both IDUs and NIDUs. Integrating HIV testing into drug treatment and expanding drug treatment may be effective to increase HIV testing uptake among both IDUs and NIDUs in Myanmar.                                                                                                                                                                                                                                                                                                                                                                                                 | 1                  |
| <b>Introduction</b>  |        |                                                                                                                                                                                                                                                                                                                                                                                                                                                                                                                                                                                                                                                                                                                                                                                                                                                                                                                                                                                                                                                                                                                                                                                                                                                                                                                                                                                                                                                       |                    |
| Background/rationale | 2      | <b>Explain the scientific background and rationale for the investigation being reported</b><br>Myanmar is one of the countries hardest hit by the HIV epidemic in South-East Asia. Injecting drug use is a primary mode of HIV transmission in the country. The estimated number of drug users in 2008 was 300,000-400,000, of whom 90,000-150,000 were injecting drug users (IDUs). HIV prevalence among IDUs was 21.9 % in 2011 (NAP/Myanmar, 2012). HIV testing is a highly cost-effective intervention for HIV risk reduction and transmission to the general population. Early detection of HIV infection in individuals is essential to provide HIV-related support, care, and treatment, and to prevent further spread of infection. In addition, HIV testing and counseling can increase knowledge of HIV/AIDS, reduce risky sexual and drug use behaviors, and prevent other STIs. It is therefore important to encourage IDUs and non-injecting drug users (NIDUs) to be tested for HIV infection due to their risk behaviors. However, HIV testing uptake has been a major challenge within the drug using populations. Due to varying levels of stigma and discrimination associated with drug use and its illegality, access to mainstream public health services is often limited in the drug using population. In Myanmar, however, only limited information is available on the characteristics of drug users undergoing HIV testing. | 3 to 4             |
| Objectives           | 3      | <b>State specific objectives, including any prespecified hypotheses</b><br>The purpose of this study was to identify the characteristics of IDUs and NIDUs who underwent HIV testing and to identify factors associated with testing uptake in Lashio Township, Northern Shan State, Myanmar. We hypothesized NIDUs tested                                                                                                                                                                                                                                                                                                                                                                                                                                                                                                                                                                                                                                                                                                                                                                                                                                                                                                                                                                                                                                                                                                                            | 4                  |

1  
2  
3  
4  
5  
6  
7  
8  
9  
10  
11  
12  
13  
14  
15  
16  
17  
18  
19  
20  
21  
22  
23  
24  
25  
26  
27  
28  
29  
30  
31  
32  
33  
34  
35  
36  
37  
38  
39  
40  
41  
42  
43  
44  
45  
46  
47  
48  
49

|                |   |                                                                                                                                                                                                                                                                                                                                                                                                                                                                                                                                                                                                                                                                                                                                                                                                                                                                                                                                                                                                                                                                                                                                                                                                                                                                                                                                                                                                                                                                                                                                                                                                                                                                                    |        |
|----------------|---|------------------------------------------------------------------------------------------------------------------------------------------------------------------------------------------------------------------------------------------------------------------------------------------------------------------------------------------------------------------------------------------------------------------------------------------------------------------------------------------------------------------------------------------------------------------------------------------------------------------------------------------------------------------------------------------------------------------------------------------------------------------------------------------------------------------------------------------------------------------------------------------------------------------------------------------------------------------------------------------------------------------------------------------------------------------------------------------------------------------------------------------------------------------------------------------------------------------------------------------------------------------------------------------------------------------------------------------------------------------------------------------------------------------------------------------------------------------------------------------------------------------------------------------------------------------------------------------------------------------------------------------------------------------------------------|--------|
|                |   | HIV than IDUs.                                                                                                                                                                                                                                                                                                                                                                                                                                                                                                                                                                                                                                                                                                                                                                                                                                                                                                                                                                                                                                                                                                                                                                                                                                                                                                                                                                                                                                                                                                                                                                                                                                                                     |        |
| <b>Methods</b> |   |                                                                                                                                                                                                                                                                                                                                                                                                                                                                                                                                                                                                                                                                                                                                                                                                                                                                                                                                                                                                                                                                                                                                                                                                                                                                                                                                                                                                                                                                                                                                                                                                                                                                                    |        |
| Study design   | 4 | <b>Present key elements of study design early in the paper</b><br>A cross-sectional study                                                                                                                                                                                                                                                                                                                                                                                                                                                                                                                                                                                                                                                                                                                                                                                                                                                                                                                                                                                                                                                                                                                                                                                                                                                                                                                                                                                                                                                                                                                                                                                          | 4      |
| Setting        | 5 | <b>Describe the setting, locations, and relevant dates, including periods of recruitment, exposure, follow-up, and data collection</b><br>The study was conducted in Lashio city, Northern Shan State of Myanmar, a small hill-town located close to the Chinese border. Lashio is one of the priority townships in Myanmar that has been recommended for HIV interventions due to the high HIV prevalence among IDUs. IDUs' HIV prevalence in Lashio was 48.5 % in 2007, while that among NIDUs was not available in Myanmar. Data were collected in January and February 2010 using respondent-driven sampling (RDS) method . After obtaining written informed consent from each participant, the lead researcher and six trained interviewers conducted interviews for data collection. They interviewed the participants for 30-40 minutes for each in a private setting. Most interviews were conducted at a local drop-in center (DIC). The lead researcher and trained interviewers went to the field to recruit participants who were willing to participate in this study without coming to a DIC.                                                                                                                                                                                                                                                                                                                                                                                                                                                                                                                                                                        | 5 to 7 |
| Participants   | 6 | <b>(a) Give the eligibility criteria, and the sources and methods of selection of participants</b><br>In this study, IDUs were defined as individuals who have visible signs of injection and/or who injected drugs in the past 6 months. NIDUs were defined as those with no history of injecting drug use and those who used drugs by a non-injecting route in the past 6 months. Study participants were recruited using the following criteria: 1) male IDUs and NIDUs, 2) aged 18 years or older, 3) had used drugs in the last 6 months, 4) not suffering from a serious drug dependency and 5) able to speak Myanmar language.<br>A respondent-driven sampling (RDS) method was used to recruit a participant that is an effective method to reach hidden population. The first respondent was recruited from the pool of service-recipients at a local drop-in center. That successfully recruited participant was then provided with three coupons with serial numbers and instructions for passing those coupons to peers who were using drugs currently. Coupons were given a 2-weeks expiration date. The second respondent was also recruited in the same way. All respondents recruited in this manner received an Information, Education and Communication (IEC) pack that included 2 condoms with gel packs along with an incentive of 2000 Kyats (US\$ 2.5) as compensation for their time and travel. Respondents were eligible to receive a secondary incentive if recruits referred through them showed up at study sites to participate within the expiry period of their recruitment coupons. The secondary incentive was 500 kyats (0.5\$) per recruitment. | 5 to 6 |
| Variables      | 7 | <b>Clearly define all outcomes, exposures, predictors, potential confounders, and effect modifiers. Give diagnostic criteria, if applicable</b><br>The outcome variable was ever tested HIV. The exposure variables included socio-demographic characteristic, drug use, sexual, HIV testing behaviors, and health service utilization behaviors of the participants. The contents of the study                                                                                                                                                                                                                                                                                                                                                                                                                                                                                                                                                                                                                                                                                                                                                                                                                                                                                                                                                                                                                                                                                                                                                                                                                                                                                    | 6 to 7 |

|                              |    |                                                                                                                                                                                                                                                                                                                                                                                                                                                                                                                                                                                                                                                                                                                                         |    |
|------------------------------|----|-----------------------------------------------------------------------------------------------------------------------------------------------------------------------------------------------------------------------------------------------------------------------------------------------------------------------------------------------------------------------------------------------------------------------------------------------------------------------------------------------------------------------------------------------------------------------------------------------------------------------------------------------------------------------------------------------------------------------------------------|----|
|                              |    | questions were adapted from several different studies in Myanmar.                                                                                                                                                                                                                                                                                                                                                                                                                                                                                                                                                                                                                                                                       |    |
| Data sources/<br>measurement | 8* | <b>For each variable of interest, give sources of data and details of methods of assessment (measurement). Describe comparability of assessment methods if there is more than one group</b><br>The socio-demographic characteristics, drug use behavior and health services utilization questions were adapted from the Rapid Assessment and Response on Drug Use and from the HIV Survey of the Asian Harm Reduction Network, Myanmar . Sexual behaviors and HIV testing behavior questions were adapted from the Behavioral Surveillance Survey (BSS) Questionnaire of the Ministry of Health, Myanmar. Pre-testing of the full questionnaire used in this study was done in Lashio with 20 IDUs and 20 NIDUs before data collection. | 7  |
| Bias                         | 9  | <b>Describe any efforts to address potential sources of bias</b><br>HIV testing was self-reported by drug users, and we were not able to confirm their HIV status.                                                                                                                                                                                                                                                                                                                                                                                                                                                                                                                                                                      | 16 |
| Study size                   | 10 | <b>Explain how the study size was arrived at</b><br>Using RSD method, a total of 176 IDUs and 217 NIDUs were enrolled in this study. Of them, 18 IDUs and 7 NIDUs were excluded from analysis because of incomplete responses. The remaining participants, 158 IDUs and 210 NIDUs, were included in the present data analysis.                                                                                                                                                                                                                                                                                                                                                                                                          | 5  |
| Quantitative variables       | 11 | <b>Explain how quantitative variables were handled in the analyses. If applicable, describe which groupings were chosen and why</b><br>Data were coded and entered using the Statistical Package for the Social Sciences (SPSS) version 16 (SPSS Inc., Chicago, IL, USA) for all analyses. Data analysis was carried out separately for IDUs and NIDUs.                                                                                                                                                                                                                                                                                                                                                                                 | 8  |
| Statistical methods          | 12 | <b>(a) Describe all statistical methods, including those used to control for confounding</b><br>Descriptive statistics and $\chi^2$ tests were used to compare background characteristics of the participants. Bivariate analyses were initially conducted to examine factors associated with HIV testing. Finally, multivariate logistic regression was performed to calculate adjusted odds ratios (AORs), 95% confidence intervals (CIs), and corresponding <i>P</i> -values.                                                                                                                                                                                                                                                        | 8  |
|                              |    | <b>(b) Describe any methods used to examine subgroups and interaction</b><br>Not applicable                                                                                                                                                                                                                                                                                                                                                                                                                                                                                                                                                                                                                                             |    |
|                              |    | <b>(c) Explain how missing data were addressed</b><br>18 IDUs and 7 NIDUs were excluded from analysis because of incomplete responses. The remaining participants, 158 IDUs and 210 NIDUs, were included in the present data analysis.                                                                                                                                                                                                                                                                                                                                                                                                                                                                                                  | 5  |
|                              |    | <b>(d) If applicable, describe analytical methods taking account of sampling strategy</b><br>Not applicable                                                                                                                                                                                                                                                                                                                                                                                                                                                                                                                                                                                                                             |    |
|                              |    | <b>(e) Describe any sensitivity analyses</b>                                                                                                                                                                                                                                                                                                                                                                                                                                                                                                                                                                                                                                                                                            |    |

|                  |     |                                                                                                                                                                                                                                                                                                                                                                                                                                                                                                                                                                                                                                                                                                                                                                                                                                                                                                                                                                                               |         |
|------------------|-----|-----------------------------------------------------------------------------------------------------------------------------------------------------------------------------------------------------------------------------------------------------------------------------------------------------------------------------------------------------------------------------------------------------------------------------------------------------------------------------------------------------------------------------------------------------------------------------------------------------------------------------------------------------------------------------------------------------------------------------------------------------------------------------------------------------------------------------------------------------------------------------------------------------------------------------------------------------------------------------------------------|---------|
|                  |     | Not applicable                                                                                                                                                                                                                                                                                                                                                                                                                                                                                                                                                                                                                                                                                                                                                                                                                                                                                                                                                                                |         |
| <b>Results</b>   |     |                                                                                                                                                                                                                                                                                                                                                                                                                                                                                                                                                                                                                                                                                                                                                                                                                                                                                                                                                                                               |         |
| Participants     | 13* | <b>(a) Report numbers of individuals at each stage of study—eg numbers potentially eligible, examined for eligibility, confirmed eligible, included in the study, completing follow-up, and analysed</b><br>176 IDUs and 217 NIDUs were recruited in this study. Due to incomplete responses, 18 IDUs and 7 NIDUs were excluded from analysis.                                                                                                                                                                                                                                                                                                                                                                                                                                                                                                                                                                                                                                                | 5       |
|                  |     | <b>(b) Give reasons for non-participation at each stage</b><br>Not applicable                                                                                                                                                                                                                                                                                                                                                                                                                                                                                                                                                                                                                                                                                                                                                                                                                                                                                                                 |         |
|                  |     | <b>(c) Consider use of a flow diagram</b><br>Not applicable                                                                                                                                                                                                                                                                                                                                                                                                                                                                                                                                                                                                                                                                                                                                                                                                                                                                                                                                   |         |
| Descriptive data | 14* | <b>(a) Give characteristics of study participants (eg demographic, clinical, social) and information on exposures and potential confounders</b><br>The socio-demographic characteristics of the IDUs and NIDUs. Of the 368 respondents, 158 participants were IDUs and 210 participants were NIDUs. The mean age was significantly different between IDUs and NIDUs; 29.8 (SD 6.7) years for IDUs and 25.5 (SD 5.8) years for NIDUs (P < 0.001). Among IDUs, 48.7% were between 21-30 years and 31.6% were between 31-40 years of age. Of the NIDUs, 63.8% were between 21-30 years and 14.3% were between 31-40 years. With regard to education levels, about a third of IDUs and NIDUs had primary or no formal education. Overall, 12.7% of IDUs and a significantly higher percentage of NIDUs (31.9%) had migrated to Lashio from another part of Myanmar (P < 0.001).                                                                                                                   | 9       |
|                  |     | <b>(b) Indicate number of participants with missing data for each variable of interest</b><br>Not applicable                                                                                                                                                                                                                                                                                                                                                                                                                                                                                                                                                                                                                                                                                                                                                                                                                                                                                  |         |
| Outcome data     | 15* | <b>Report numbers of outcome events or summary measures</b><br>In total, 76.6% of IDUs and 45.7% of NIDUs were ever tested for HIV.                                                                                                                                                                                                                                                                                                                                                                                                                                                                                                                                                                                                                                                                                                                                                                                                                                                           | 9 to 10 |
| Main results     | 16  | <b>(a) Give unadjusted estimates and, if applicable, confounder-adjusted estimates and their precision (eg, 95% confidence interval). Make clear which confounders were adjusted for and why they were included</b><br><b>IDUs model</b><br>Bivariate analysis showed that those belonging to the older age group (odd ratio [OR] 2.57; 95% confidence interval [CI]: 1.17-5.66) and those who had a regular job (OR 2.91; 95% CI: 1.26-6.70) were more likely to have tested for HIV. Conversely, IDUs who practiced risky behaviors such as using more than two kinds of drugs (poly drugs) (OR 0.40; 95% CI: 0.18-0.85) and injecting drugs more than twice per day (OR 0.41; 95% CI: 0.19-0.88) were less likely to have tested for HIV. Participants who had ever received drug treatment (OR 14.57; 95% CI: 5.82-36.47), who had ever registered as a drug user (OR 5.33; 2.25-12.62), and who perceived themselves as being at risk of HIV infection (OR 3.57; 95% CI: 1.51-8.43) were | 9 to 11 |

|                          |           |                                                                                                                                                                                                                                                                                                                                                                                                                                                                                                                                                                                                                                                                                                                                                                                                                                                                                                                                                                                                                                                                                                                                                                                                                                                                                                                                                                                                                                                                                                                                                                                                                                                                                                                                                                                                                                                                                                                                                                                                                                                                           |                 |
|--------------------------|-----------|---------------------------------------------------------------------------------------------------------------------------------------------------------------------------------------------------------------------------------------------------------------------------------------------------------------------------------------------------------------------------------------------------------------------------------------------------------------------------------------------------------------------------------------------------------------------------------------------------------------------------------------------------------------------------------------------------------------------------------------------------------------------------------------------------------------------------------------------------------------------------------------------------------------------------------------------------------------------------------------------------------------------------------------------------------------------------------------------------------------------------------------------------------------------------------------------------------------------------------------------------------------------------------------------------------------------------------------------------------------------------------------------------------------------------------------------------------------------------------------------------------------------------------------------------------------------------------------------------------------------------------------------------------------------------------------------------------------------------------------------------------------------------------------------------------------------------------------------------------------------------------------------------------------------------------------------------------------------------------------------------------------------------------------------------------------------------|-----------------|
|                          |           | <p>significantly more likely to have tested for HIV. The multivariate model for IDUs indicated that those who were married (AOR 0.24; 95% CI: 0.06-0.94) and injected drugs twice daily (AOR 0.30; 95% CI: 0.09-0.97) were less likely to have tested for HIV. Meanwhile, IDUs having a regular job (AOR 4.50; 95% CI: 1.08-23.17), who had received drug treatment (AOR 13.07; 95% CI: 3.38-50.53), and perceived themselves as being at risk of HIV (AOR 5.70; 95% CI: 1.40-23.25) were more likely to have undergone HIV testing.</p> <p><b><u>NIDUs model</u></b></p> <p>Nearly half of NIDUs (45.7%) had ever tested for HIV. Being of Shan (OR 0.28; 95% CI: 0.12-0.62) or Kachin (OR 0.21; 95% CI: 0.09-0.49) ethnicity, reporting poly drug use (OR 0.40; 95% CI: 0.21-0.74), and having visited a female sex worker within the last 3 months (OR 0.50; 95% CI: 0.29-0.88) were negatively associated with HIV testing. Conversely, NIDUs who had ever received drug treatment (OR 2.73; 95% CI: 1.51-4.92), had ever registered as a drug user (OR 3.48; 95% CI: 1.61-7.49), and who perceived themselves as being at risk of HIV infection (OR 3.29; 95% CI: 1.86-5.83) were more likely to have tested for HIV. In the multivariate model for NIDUs, individuals who were of Shan (AOR 0.30; 95% CI: 0.11-0.84) or Kachin (AOR 0.30; 95% CI: 0.10-0.87) ethnicity and who reported poly drug use within the last three months (AOR 0.33; 95% CI: 0.14-0.77) were less likely to have tested for HIV. Similar results as were observed among IDUs were observed among NIDUs, too. NIDUs who had ever received drug treatment (AOR 3.58; 95% CI: 1.38-9.24), ever registered as a drug user (AOR 4.38; 95% CI: 1.31-14.65), and who perceived themselves as at risk of HIV (AOR 4.46; 95% CI: 2.06-9.65) were more likely to have tested for HIV.</p> <p>We included all variables in the multivariate model to see which factors were most influencing factors of uptake of HIV test analysis even though it was not significant in the bivariate analysis.</p> |                 |
|                          |           | <p><b>(b) Report category boundaries when continuous variables were categorized</b></p> <p>Mean age was used to categorize age variable.</p>                                                                                                                                                                                                                                                                                                                                                                                                                                                                                                                                                                                                                                                                                                                                                                                                                                                                                                                                                                                                                                                                                                                                                                                                                                                                                                                                                                                                                                                                                                                                                                                                                                                                                                                                                                                                                                                                                                                              |                 |
|                          |           | <p><b>(c) If relevant, consider translating estimates of relative risk into absolute risk for a meaningful time period</b></p> <p>Not applicable</p>                                                                                                                                                                                                                                                                                                                                                                                                                                                                                                                                                                                                                                                                                                                                                                                                                                                                                                                                                                                                                                                                                                                                                                                                                                                                                                                                                                                                                                                                                                                                                                                                                                                                                                                                                                                                                                                                                                                      |                 |
| <p>Other analyses</p>    | <p>17</p> | <p><b>Report other analyses done—eg analyses of subgroups and interactions, and sensitivity analyses</b></p> <p>Not applicable</p>                                                                                                                                                                                                                                                                                                                                                                                                                                                                                                                                                                                                                                                                                                                                                                                                                                                                                                                                                                                                                                                                                                                                                                                                                                                                                                                                                                                                                                                                                                                                                                                                                                                                                                                                                                                                                                                                                                                                        |                 |
| <p><b>Discussion</b></p> |           | <p>This is the first study to identify the factors associated with HIV testing uptake among IDUs and NIDUs in Lashio, where HIV prevalence among IDUs was one of the highest in Myanmar (NAP/Myanmar, 2008). IDUs' HIV testing rate was higher compared to that of NIDUs' where harm reduction programs were implemented, especially where such programs targeted IDUs. Among IDUs, 76.6% had ever tested for HIV, while 45.7% of NIDUs had ever tested for HIV. These percentages are much higher compared to one-year testing rates reported among Italian drug users: 37.4% for IDUs and 28% for NIDUs (Camoni et al., 2011). HIV testing was positively associated with ever received drug treatment and perception of personal risk of HIV infection among both IDUs and NIDUs. IDUs who had a regular job at the time of survey were also more likely to have undergone HIV testing. Married IDUs and IDUs who injected more than twice daily, meanwhile, were less likely to have undergone HIV testing. Among NIDUs, those who had ever registered as a drug user were more likely to have undergone HIV testing. NIDUs of Shan or Kachin ethnicity and who reported poly drug use within the last three months</p>                                                                                                                                                                                                                                                                                                                                                                                                                                                                                                                                                                                                                                                                                                                                                                                                                                               | <p>11 to 16</p> |

1  
2  
3  
4  
5  
6  
7  
8  
9  
10  
11  
12  
13  
14  
15  
16  
17  
18  
19  
20  
21  
22  
23  
24  
25  
26  
27  
28  
29  
30  
31  
32  
33  
34  
35  
36  
37  
38  
39  
40  
41  
42  
43  
44  
45  
46  
47  
48  
49

were less likely to have undergone HIV testing.

Notably, both IDUs and NIDUs who had ever received drug treatment were more likely to have been tested for HIV. In Vietnam, female sex workers who spent time in a rehabilitation center were more likely to have tested for HIV (Grayman et al., 2005). Also in Italy, IDUs who had ever received both pharmacological and psychological treatments were more likely to have tested for HIV than were those who underwent only one kind of treatment (Camoni et al., 2011). Drug treatment is playing an important role to reduce risk of HIV infection among both drug users (CDC, 2002). However, HIV testing is not currently a compulsory service at drug treatment centers in Myanmar unless a drug user undergoing detoxification requests it. Since HIV testing and counseling effectively reduce risk behaviors in drug using populations, the United States Centers for Disease Control and Prevention recommends that HIV testing should be integrated into drug treatment services (CDC, 2002). Expanding drug treatment to incorporate HIV testing services may increase the number of IDUs and NIDUs accessing HIV testing services in Myanmar, too.

Within both types of drug users, those who had engaged in risk behaviors were less likely to have tested for HIV. Both IDUs who injected twice daily and NIDUs who used more than two drugs (poly drug use) were less likely to have been tested for HIV. It is not surprising that the drug users are more prone to feeling afraid of receiving HIV testing results due to their risky behaviors (Spielberg, Kurth, Gorbach, & Goldbaum, 2001).

In this study, perceived risk of HIV infection was a significant predictor for HIV testing among both drug users. They may perceive themselves as at risk of HIV infection because they learn their partner’s HIV status (Adih & Alexander, 1999) or may weigh the implications of their risky drugs use and sexual behaviors (Filipe et al., 2005). In this study, we did not confirm participants’ HIV status due to ethical considerations. Regardless of HIV status and risk behaviors, perceived risk of HIV infection is a self-protective behavior which can motivate individuals to practice safer behaviors (Reisen & Poppen, 1999).

This study showed that IDUs who had a regular job were more likely to have been tested for HIV infection. The possible reason for this is that Myanmar National AIDS Programs included workplace as a priority setting for HIV/AIDS intervention/prevention program (NAP/Myanmar, 2010). Thus, IDUs who had a regular job have been tested for HIV infection through those programs. On the other hand, conflicting findings found among Russian IDUs (Niccolai et al., 2010) and tuberculosis patients from Uganda (Sendagire et al., 2010) and Ethiopia (Jerene, Endale, & Lindtjorn, 2007). In these studies, unemployed or part-time workers were more likely to test for HIV than employed or full time workers. In the present study, married IDUs were less likely to have been tested for HIV than single IDUs. This is an important finding since two-fifths of all new HIV infections in Myanmar occurred through husband-to-wife transmission in 2010 and the trend of husband-to-wife transmission is estimated to increase to nearly half of all new infections among women by 2015 (Myat, 2010). HIV testing programs urgently need to focus on encouraging married IDUs to undergo HIV testing. In China, too, married men who have sex with men (MSM) were less likely to have been tested for HIV (Wei et al., 2011).

NIDUs who registered as drug users in the Government facilities were more likely to have been tested for HIV. Encouraging drug users to register as drug users may be effective to increase the uptake of HIV testing services among NIDUs. Nevertheless, most of the drug users were reluctant to register as a drug user due to several barriers, including stigma toward drug addicts, financial problems (Appel, Ellison, Jansky, & Oldak, 2004), fear of being known as a drug user, perceived low efficacy of available treatment, and the possibility of losing employment opportunities (Bobrova et al., 2006; Tucker, 2001). Another important finding was that NIDUs who were of Shan or Kachin ethnicities were less likely to have tested their HIV status than were those of Burma ethnicity. It may be because most of the IEC materials, HIV testing

|                  |    |                                                                                                                                                                                                                                                                                                                                                                                                                                                                                                                                                                                                                                                                                                                                                                                                                                                                                                                                                                                                                                                                                                                                                                                                                                                                                                                                                                              |          |
|------------------|----|------------------------------------------------------------------------------------------------------------------------------------------------------------------------------------------------------------------------------------------------------------------------------------------------------------------------------------------------------------------------------------------------------------------------------------------------------------------------------------------------------------------------------------------------------------------------------------------------------------------------------------------------------------------------------------------------------------------------------------------------------------------------------------------------------------------------------------------------------------------------------------------------------------------------------------------------------------------------------------------------------------------------------------------------------------------------------------------------------------------------------------------------------------------------------------------------------------------------------------------------------------------------------------------------------------------------------------------------------------------------------|----------|
|                  |    | information, and HIV counseling services were conducted in Myanmar language, which Shan and Kachin ethnicities were not always familiar with. Participants who do not speak or read Myanmar language may have had difficulty in accessing HIV testing services. If HIV testing services were offered in other languages for minorities such as Shan and Kachin, they would be better able to make use of those services.                                                                                                                                                                                                                                                                                                                                                                                                                                                                                                                                                                                                                                                                                                                                                                                                                                                                                                                                                     |          |
| Key results      | 18 | <b>Summarise key results with reference to study objectives</b><br>Both IDUs and NIDUs who had ever received drug treatment were more likely to have tested for HIV. More IDUs received HIV testing compared to NIDUs. Low HIV testing rates were found among IDUs who were married and who injected twice per day and among NIDUs reporting poly drug use within the last three months and who were of Kachin or Shan ethnicity. To increase HIV testing rate especially among NIDUs, we need to encourage them to register as a drug users and providing them with HIV services in Myanmar language as well as in ethnic languages. Integrating HIV testing into drug treatment and expanding drug treatment services is an effective way to increase utilization of HIV testing among both types of drug users in Myanmar.                                                                                                                                                                                                                                                                                                                                                                                                                                                                                                                                                | 16       |
| Limitations      | 19 | <b>Discuss limitations of the study, taking into account sources of potential bias or imprecision. Discuss both direction and magnitude of any potential bias</b><br>Our findings are derived from a cross-sectional study, and several possible limitations of these findings should be noted. First, HIV testing was self-reported by drug users, and we were not able to confirm their HIV status. Second, the lack of identified significant correlates of HIV testing may be due to insufficient sample size for the required statistical power or loss of information resulting from dichotomization of covariates. Despite these potential methodological limitations, these results present the first look at HIV testing behaviors among drug users in Lashio, the famous border trade city with a high burden of HIV infection. Further research is needed to understand barriers and decisions to access HIV testing among drug users especially for those who are married and engaged in risk behaviors.                                                                                                                                                                                                                                                                                                                                                         | 16       |
| Interpretation   | 20 | <b>Give a cautious overall interpretation of results considering objectives, limitations, multiplicity of analyses, results from similar studies, and other relevant evidence</b><br>Results may need to be carefully interpreted as drug users from other cities from Myanmar may have different characteristics. However, IDUs who had ever received both pharmacological and psychological treatments were more likely to have tested for HIV than were those who underwent only one kind of treatment in Italy (Camoni et al., 2011) and female sex workers from Vietnam who spent time in a rehabilitation center were more likely to have tested for HIV (Grayman et al., 2005). Drug treatment is playing an important role to reduce risk of HIV infection among both drug users (CDC, 2002). However, HIV testing is not currently a compulsory service at drug treatment centers in Myanmar unless a drug user undergoing detoxification requests it. Since HIV testing and counseling effectively reduce risk behaviors in drug using populations, the United States Centers for Disease Control and Prevention recommends that HIV testing should be integrated into drug treatment services (CDC, 2002). Expanding drug treatment to incorporate HIV testing services may increase the number of IDUs and NIDUs accessing HIV testing services in Myanmar, too. | 12 to 13 |
| Generalisability | 21 | <b>Discuss the generalisability (external validity) of the study results</b><br>Our results may not be generalized to drug users in other cities, as both IDUs and NIDUs from other parts of Myanmar may have different characteristics than those in Lashio.                                                                                                                                                                                                                                                                                                                                                                                                                                                                                                                                                                                                                                                                                                                                                                                                                                                                                                                                                                                                                                                                                                                |          |



1  
2  
3  
4  
5  
6  
7  
8  
9  
10  
11  
12  
13  
14  
15  
16  
17  
18  
19  
20  
21  
22  
23  
24  
25  
26  
27  
28  
29  
30  
31  
32  
33  
34  
35  
36  
37  
38  
39  
40  
41  
42  
43  
44  
45  
46  
47  
48  
49

|                          |    |                                                                                                        |    |
|--------------------------|----|--------------------------------------------------------------------------------------------------------|----|
| <b>Other information</b> |    |                                                                                                        |    |
| Funding                  | 22 | This study has received funding from the University of Tokyo and the ITO foundation (G 0114) of Tokyo. | 17 |

\*Give information separately for cases and controls in case-control studies and, if applicable, for exposed and unexposed groups in cohort and cross-sectional studies.

**Note:** An Explanation and Elaboration article discusses each checklist item and gives methodological background and published examples of transparent reporting. The STROBE checklist is best used in conjunction with this article (freely available on the Web sites of PLoS Medicine at <http://www.plosmedicine.org/>, Annals of Internal Medicine at <http://www.annals.org/>, and Epidemiology at <http://www.epidem.com/>). Information on the STROBE Initiative is available at [www.strobe-statement.org](http://www.strobe-statement.org).



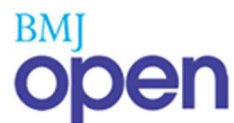

**Factors associated with HIV testing among male injecting and non-injecting drug users in Lashio, Myanmar: A cross-sectional study**

|                                 |                                                                                                                                                                                             |
|---------------------------------|---------------------------------------------------------------------------------------------------------------------------------------------------------------------------------------------|
| Journal:                        | <i>BMJ Open</i>                                                                                                                                                                             |
| Manuscript ID:                  | bmjopen-2013-002747.R1                                                                                                                                                                      |
| Article Type:                   | Research                                                                                                                                                                                    |
| Date Submitted by the Author:   | 11-Apr-2013                                                                                                                                                                                 |
| Complete List of Authors:       | Saw, Yu Mon; The University of Tokyo,<br>Yasuoka, Junko; The University of Tokyo, Dept. of Community and Global Health<br>Saw, Thu Nandar<br>Poudel, Krishna<br>Tun, Soe<br>Jimba, Masamine |
| <b>Primary Subject Heading</b>: | HIV/AIDS                                                                                                                                                                                    |
| Secondary Subject Heading:      | Infectious diseases, Addiction                                                                                                                                                              |
| Keywords:                       | HIV & AIDS < INFECTIOUS DISEASES, HEALTH SERVICES ADMINISTRATION & MANAGEMENT, Public health < INFECTIOUS DISEASES                                                                          |
|                                 |                                                                                                                                                                                             |

SCHOLARONE™  
Manuscripts

only

1  
2  
3  
4  
5 Factors associated with HIV testing among male injecting and non-injecting drug users  
6 in Lashio, Myanmar: A cross-sectional study  
7

8  
9  
10 *Yu Mon Saw<sup>1</sup>, Junko Yasuoka<sup>1</sup>, Thu Nandar Saw<sup>1</sup>, Krishna C. Poudel<sup>2</sup>, Soe Tun<sup>3</sup>,*  
11 *Masamine Jimba<sup>1</sup>*  
12

13  
14 <sup>1</sup>*Department of Community and Global Health, Graduate School of Medicine, the*  
15 *University of Tokyo, Tokyo, Japan*  
16

17  
18 <sup>2</sup>*Department of Public Health, School of Public Health and Health Science, University*  
19 *of Massachusetts Amherst, Amherst, MA, USA*  
20

21  
22 <sup>3</sup>*Department of Preventive and Social Medicine, the University of Medicine 2,*  
23 *Yangon, Myanmar*  
24  
25

26  
27 \*Corresponding author:

28 Junko Yasuoka, D.Sc., M.P.H  
29 Department of Community and Global Health  
30 Graduate School of Medicine  
31 The University of Tokyo  
32 7-3-1 Hongo, Bunkyo-ku, Tokyo 113-0033, Japan  
33 E- mail: [jyasuoka@post.harvard.edu](mailto:jyasuoka@post.harvard.edu)  
34 Tel: +81(0)3-5844-3698  
35 Fax: +81(0)3-5841-3422  
36  
37  
38  
39  
40  
41  
42  
43  
44  
45  
46  
47  
48  
49  
50  
51

52 Word counts: Abstract – 253, Main Text – 3543; No. of Tables: 3  
53  
54  
55  
56  
57  
58  
59  
60

## ARTICLE SUMMARY

### Article focus

- To identify factors associated with HIV testing among injecting (IDUs) and non-injecting drug users (NIDUs) in Lashio, Myanmar

### Key messages

- IDUs were more likely than NIDUs to have been tested for HIV.
- HIV testing rates were especially low among both IDUs and NIDUs engaging in risk behaviors.
- IDUs and NIDUs would benefit from integrating HIV testing services into drug treatment services.

### Strengths and limitation of this study

- The first look at HIV testing that covered both IDUs and NIDUs
- Respondent driven Sampling was used to recruit participants.
- HIV testing was self-reported by drug users.
- Results may not be generalized to drug users in other cities of Myanmar.

### Abstract

**Objectives:** HIV testing is an effective intervention for reducing HIV risk and providing information on HIV status. However, uptake of HIV testing is a major challenge within the drug-using population due to the stigma and discrimination associated with their illegal drug use behaviors. This study thus aimed to identify factors associated with HIV testing among injecting (IDUs) and non-injecting drug users (NIDUs) in Lashio, Myanmar.

**Methods:** A cross-sectional study was conducted from January to February 2010. In total, 158 male IDUs and 210 male NIDUs were recruited using a respondent-driven sampling method. Multivariate analysis was performed separately for IDUs and NIDUs.

**Results:** Approximately 77% of IDUs and 46% of NIDUs were ever tested for HIV. The multivariate analysis revealed that having ever received drug treatment was positively associated with HIV testing among both IDUs (adjusted odds ratio [AOR] 13.07; 95%

1  
2  
3  
4  
5 confidence interval [CI]: 3.38-50.53) and NIDUs (AOR 3.58; 95% CI: 1.38-9.24). IDUs  
6  
7 who were married (AOR 0.24; 95% CI: 0.06-0.94) and who injected at least twice daily  
8  
9 (AOR 0.30; 95%CI: 0.09-0.97) were less likely to undergo HIV testing. Among NIDUs,  
10  
11 those who belonged to Shan (AOR 0.30; 95%CI: 0.11-0.84) or Kachin (AOR 0.30;  
12  
13 95%CI: 0.10-0.87) ethnicities were less likely to test for HIV.

14 **Conclusions:** IDUs and NIDUs who have received drug treatment are more likely to  
15  
16 test for HIV. Integrating HIV testing into drug treatment programs alongside general  
17  
18 expansion of HIV testing services may be effective to increase HIV testing uptake  
19  
20 among both IDUs and NIDUs in the Northern Shan State of Myanmar.

21  
22 **Key words:** HIV, drug users, diagnosis, Myanmar  
23  
24  
25  
26  
27  
28  
29  
30  
31  
32  
33  
34  
35  
36  
37  
38  
39  
40  
41  
42  
43  
44  
45  
46  
47  
48  
49  
50  
51  
52  
53  
54  
55  
56  
57  
58  
59  
60

## Introduction

Myanmar is one of the countries hardest hit by the HIV epidemic in South-East Asia.

According to the Joint United Nations Programme on AIDS (UNAIDS), approximately 240,000 people were living with HIV/AIDS at the end of 2011, and HIV prevalence was 0.5% within Myanmar's adult population.<sup>1</sup> Injecting drug use is a primary mode of HIV transmission in the country. The estimated number of drug users in 2008 was 300,000-400,000, of whom 90,000-150,000 were injecting drug users (IDUs).<sup>2,3</sup> HIV prevalence among IDUs was 21.9 % in 2011.<sup>1</sup> To tackle this problem, Myanmar has actively promoted condom use, improved the management of sexually transmitted infections (STIs), and made access to HIV testing and counseling services more widespread.

HIV testing is a highly cost-effective intervention for reduction of HIV risk and transmission.<sup>4</sup> Early discovery of HIV infection in individuals is essential to provide HIV-related care and treatment, and to prevent further spread of the disease to others. In addition, HIV testing and counseling can increase knowledge of HIV/AIDS, reduce risky sexual and drug use behaviors, and prevent other STIs.<sup>5-9</sup> It is therefore important to encourage IDUs and non-injecting drug users (NIDUs) to be tested for HIV infection.

In Myanmar, both the government and international non-governmental organizations (INGOs) have been providing a variety of HIV testing services including

1  
2  
3  
4  
5  
6 referrals and pre- and post-test counseling.<sup>10</sup> By the end of 2006, 289 service delivery  
7  
8  
9 points were providing HIV testing services in Myanmar – 53% implemented through  
10  
11  
12 the government sector, and 47% through INGOs.<sup>11</sup> However, HIV testing uptake has  
13  
14  
15 been a major challenge within the drug using populations. Due to varying levels of  
16  
17  
18 stigma and discrimination associated with drug use and its illegality, access to  
19  
20  
21 mainstream public health services is often limited in the drug using population.<sup>12</sup> In  
22  
23  
24 Myanmar, drug treatment, including methadone maintenance treatment (MMT), is  
25  
26  
27 provided through government run medical facilities, and HIV testing is not a  
28  
29  
30 compulsory service in the treatment.

31  
32 Despite the critical importance of these population sub-groups to HIV  
33  
34  
35 prevention and treatment efforts, only limited information is available on the  
36  
37  
38 characteristics of both IDUs and NIDUs undergoing HIV testing in Myanmar. Therefore,  
39  
40  
41 the purpose of this study was to identify the characteristics of IDUs and NIDUs  
42  
43  
44 undergoing HIV testing, and to identify factors associated with testing uptake in Lashio  
45  
46  
47 Township, Northern Shan State, Myanmar.

## 51 **Methods**

### 52 **Study design and area**

53  
54  
55  
56  
57 A cross-sectional study was conducted in Lashio city in the Northern Shan State of  
58  
59  
60

1  
2  
3  
4  
5  
6 Myanmar, a small hill-town located close to the Chinese border. Data were collected in  
7  
8  
9 January and February 2010. Lashio is one of the townships in Myanmar recommended  
10  
11  
12 as a priority focus for HIV interventions due to the high HIV prevalence among IDUs –  
13  
14 48.5 % in 2007.<sup>13</sup> Information on HIV prevalence among NIDUs, meanwhile, is not  
15  
16  
17  
18 available in Myanmar.  
19

### 20 21 **Study Participants**

22  
23  
24 In this study, IDUs were defined as individuals having visible signs of injection, as  
25  
26 confirmed by medical personnel in a private setting, and/or who had injected drugs in  
27  
28 the past 6 months. NIDUs were defined as those with no history of injecting drug use  
29  
30 and those who had used drugs by a non-injecting route in the past 6 months. Study  
31  
32 participants were recruited using the following criteria: 1) male IDU or NIDU, 2) aged  
33  
34  
35 18 years or older, 3) had used drugs in the last 6 months, 4) exhibiting no withdrawal  
36  
37 symptoms and not under the influence of drugs at the time of interview, and 5) able to  
38  
39  
40  
41  
42  
43  
44 speak the Myanmar language.  
45

46  
47 A total of 176 IDUs and 217 NIDUs were ultimately enrolled in the study. Of  
48  
49 them, 18 IDUs and 7 NIDUs were excluded from analysis because of incomplete  
50  
51 responses. The remaining participants, 158 IDUs and 210 NIDUs, were included in the  
52  
53  
54  
55  
56 data analysis.  
57  
58  
59  
60

### Sampling method

A respondent-driven sampling (RDS) method was used to recruit participants as an approach generally regarded as effective for reaching hidden populations.<sup>14</sup> The method uses dual incentives and a structured coupon disbursement process of “peer referral” to reduce typical flaws and biases inherent in sampling of hidden populations’. The first-round respondents, also known as “seeds”, were recruited from the pool of service-recipients at a local drop-in center (DIC). From three seeds (two IDUs and one NIDU) were recruited a total of 174 IDUs and 216 NIDUs (not including seeds) meeting the study criteria. The recruitment process did not distinguish between IDUs and NIDUs. Both IDUs and NIDUs were allowed to recruit any friends who used drugs by either means of administration. Distribution of coupons was terminated when the target sample size was attained. The successfully recruited participant was then provided with three coupons with serial numbers and instructions for passing those coupons to peers who were currently using drugs. Coupons were given a 2-week expiration date. The second respondent was also recruited in the same way.

All respondents recruited in this manner received an Information, Education and Communication (IEC) pack that included two condoms with gel packs along with an



1  
2  
3  
4  
5  
6 incentive of 2000 Kyats (US\$ 2.5) as compensation for their time and travel.  
7  
8

9 Respondents were eligible to receive a secondary incentive if recruits referred through  
10  
11 them showed up at study sites to participate within the expiration period designated on  
12  
13 their recruitment coupons. The secondary incentive was 500 kyats (0.5\$) per  
14  
15 recruitment.  
16  
17  
18  
19

## 20 21 22 **Measures**

23  
24 The dependent variable was ever experience of HIV testing. Specific HIV testing  
25  
26 behavior-related variables included ever having undergone an HIV test, HIV testing  
27  
28 frequency, date of last HIV testing, and site of last HIV testing. The independent  
29  
30 variables were socio-demographic characteristics, drug use, sexual history, HIV testing  
31  
32 behaviors, and health service utilization behaviors.<sup>13 15</sup> Assessed socio-demographic  
33  
34 variables included age (IDUs:  $\leq 29$  years old vs.  $> 29$  years old; NIDUs:  $\leq 25$  years old vs.  
35  
36  $> 25$  years old), marital status (single vs. married vs. divorced/widowed), race/ethnicity  
37  
38 (Burma vs. Shan vs. Kachin vs. Other), educational background (primary/ no formal  
39  
40 education vs. secondary education vs. high school or above), employment (non-regular  
41  
42 job vs. regular job), and Lashio residence status (migrant vs. resident).  
43  
44  
45  
46  
47  
48  
49  
50  
51

52  
53 Variables on drug use and sexual behaviors included type of illicit drug use,  
54  
55 route of administration for drug use, frequency of injecting drug use, unsafe injecting  
56  
57  
58  
59  
60

1  
2  
3  
4  
5  
6 practice (receptive or distributive syringe sharing; yes vs. no), poly drug use (yes vs. no),  
7  
8  
9 disclosure of sexual orientation (hetero- vs. bi/homosexual), having more than one  
10  
11 partner (yes vs. no), and history of female sex worker visit (yes vs. no). Variables  
12  
13 regarding health services utilization included ever undergoing drug rehabilitation  
14  
15 treatment (yes vs. no), ever registered as a drug user (yes vs. no), and ever convicted for  
16  
17 drug-related crimes (yes vs. no). All variables were measured for the past 6 months,  
18  
19 unless otherwise stated.  
20  
21  
22  
23  
24

25 The contents of the study questionnaire were adapted from several different  
26  
27 studies previously conducted in Myanmar. The socio-demographic characteristics, drug  
28  
29 use behavior, and health service utilization-related questions were adapted from the  
30  
31 Rapid Assessment and Response on Drug Use and from the HIV Survey of the Asian  
32  
33 Harm Reduction Network, Myanmar.<sup>15</sup> Sexual behavior and HIV testing behavior-  
34  
35 related questions were adapted from the Behavioral Surveillance Survey (BSS)  
36  
37 Questionnaire of the Ministry of Health, Myanmar.<sup>13</sup> Pre-testing of the full  
38  
39 questionnaire used in this study was carried out prior to data collection in Lashio with  
40  
41 20 IDUs and 20 NIDUs.  
42  
43  
44  
45  
46  
47

#### 48 **Data collection**

49  
50 After obtaining written informed consent from each participant, the lead researcher and  
51  
52 six trained interviewers conducted interviews toward data collection. Participants were  
53  
54 interviewed individually for 30-40 minutes in a private setting. Most interviews were  
55  
56  
57  
58  
59  
60

1  
2  
3  
4  
5  
6 conducted at a DIC. The research team also went to various field sites (shooting gallery,  
7  
8 drug users' homes, cemetery, etc.) to recruit participants who were willing to participate  
9  
10  
11  
12 in the study but did not want to come to the DIC.  
13

### 14 15 16 17 **Data analysis**

18  
19  
20 Data were coded and entered using the Statistical Package for the Social Sciences  
21  
22 (SPSS) version 16 (SPSS Inc., Chicago, IL, USA) for all analyses. Data analysis was  
23  
24 carried out separately for IDUs and NIDUs. Descriptive statistics and  $\chi^2$  tests were used  
25  
26 to compare participants' background characteristics. Bivariate analyses were initially  
27  
28 conducted to examine factors associated with HIV testing. Finally, all covariates were  
29  
30  
31 simultaneously entered into the multiple regression model to calculate adjusted odds  
32  
33 ratios (AORs), 95% confidence intervals (CIs), and corresponding *P*-values.  
34  
35  
36  
37  
38  
39  
40  
41

### 42 **Ethical considerations**

43  
44  
45 This study protocol was approved by the Research Ethics Committee of the Graduate  
46  
47 School of Medicine, the University of Tokyo, Japan and by the Institutional Ethical  
48  
49 Review Committee of the Department of Medical Research (Lower Myanmar), Ministry  
50  
51 of Health, Yangon, Myanmar. The objectives of the study were made clear to  
52  
53  
54 respondents before their voluntary participation, and individual written informed  
55  
56  
57  
58  
59  
60

1  
2  
3  
4  
5  
6 consent was obtained from all participants. Each participant was allowed to withdraw  
7  
8  
9 from the study at any time. Confidentiality of the entire data set was maintained at all  
10  
11  
12 stages of data collection and analysis.  
13

## 14 15 16 17 **Results**

### 18 19 **Socio-demographic and drug use characteristics (Table 1)**

20  
21  
22 Of the 368 respondents, 158 were IDUs and 210 were NIDUs. The mean age was  
23  
24 significantly different between IDUs and NIDUs; 29.8 (SD 6.7) years for IDUs and 25.5  
25  
26 (SD 5.8) years for NIDUs ( $P < 0.001$ ). With regard to education levels, about a third of  
27  
28 IDUs and NIDUs had primary or no formal education. Overall, 12.7% of IDUs and a  
29  
30 significantly higher percentage of NIDUs (31.9%) had migrated to Lashio from another  
31  
32 part of Myanmar ( $P < 0.001$ ).  
33  
34  
35  
36  
37  
38  
39  
40  
41

### 42 43 **Factors associated with HIV testing among injecting drug users (Table 2)**

44  
45 In total, 76.6 % of IDUs had ever tested for HIV. Bivariate analysis showed that those  
46  
47 belonging to the older age group (odds ratio [OR] 2.57; 95% CI: 1.17-5.66) and those  
48  
49 who had a regular job (OR 2.91; 95% CI: 1.26-6.70) were more likely to have tested for  
50  
51 HIV. Conversely, IDUs who practiced risky behaviors such as using more than two  
52  
53 kinds of drugs (poly drugs) (OR 0.40; 95% CI: 0.18-0.85) and injecting drugs at least  
54  
55  
56  
57  
58  
59  
60

1  
2  
3  
4  
5  
6 twice daily (OR 0.41; 95% CI: 0.19-0.88) were less likely to have tested for HIV.  
7  
8  
9 Participants who had ever received drug treatment (OR 14.57; 95% CI: 5.82-36.47),  
10  
11 who had ever registered as a drug user (OR 5.33; 2.25-12.62), and who perceived  
12  
13 themselves as being at risk of HIV infection (OR 3.57; 95% CI: 1.51-8.43) were  
14  
15 significantly more likely to have tested for HIV.  
16  
17  
18  
19

20  
21 The multiple regression model for IDUs indicated that those who were married  
22  
23 (AOR 0.24; 95% CI: 0.06-0.94) and who injected drugs at least twice daily (AOR 0.30;  
24  
25 95% CI: 0.09-0.97) were less likely to have tested for HIV. Meanwhile, IDUs having a  
26  
27 regular job (AOR 4.50; 95% CI: 1.08-23.17), who had received drug treatment (AOR  
28  
29 13.07; 95% CI: 3.38-50.53), and who perceived themselves as being at risk of  
30  
31 contracting HIV (AOR 5.70; 95% CI: 1.40-23.25) were more likely to have undergone  
32  
33 HIV testing.  
34  
35  
36  
37  
38  
39  
40  
41  
42  
43

#### 44 **Factors associated with HIV testing among non-injecting drug users (Table 3)**

45  
46 Nearly half of NIDUs (45.7%) had ever tested for HIV. Being of Shan (OR 0.28; 95%  
47  
48 CI: 0.12-0.62) or Kachin (OR 0.21; 95% CI: 0.09-0.49) ethnicity, reporting poly drug  
49  
50 use (OR 0.40; 95% CI: 0.21-0.74), and having visited a female sex worker within the  
51  
52 last 3 months (OR 0.50; 95% CI: 0.29-0.88) were negatively associated with HIV  
53  
54  
55  
56  
57  
58  
59  
60

1  
2  
3  
4  
5  
6 testing. Conversely, NIDUs who had ever received drug treatment (OR 2.73; 95% CI:  
7  
8 1.51-4.92), had ever registered as a drug user (OR 3.48; 95% CI: 1.61-7.49), and who  
9  
10 perceived themselves at being at risk of HIV infection (OR 3.29; 95% CI: 1.86-5.83)  
11  
12 were more likely to have tested for HIV.  
13  
14  
15  
16  
17

18 In the multiple regression model for NIDUs, individuals who were of Shan  
19  
20 (AOR 0.30; 95% CI: 0.11-0.84) or Kachin (AOR 0.30; 95% CI: 0.10-0.87) ethnicity and  
21  
22 who reported poly drug use within the last three months (AOR 0.33; 95% CI: 0.14-0.77)  
23  
24 were less likely to have tested for HIV. Similar results as were observed among IDUs  
25  
26 were also observed among NIDUs. Namely, NIDUs who had ever received drug  
27  
28 treatment (AOR 3.58; 95% CI: 1.38-9.24), who had ever registered as a drug user (AOR  
29  
30 4.38; 95% CI: 1.31-14.65), and who perceived themselves as being at risk of HIV  
31  
32 infection (AOR 4.46; 95% CI: 2.06-9.65) were more likely to have tested for HIV.  
33  
34  
35  
36  
37  
38  
39  
40  
41  
42  
43

#### 44 **Discussion**

45  
46 This is the first study to identify factors associated with HIV testing uptake among IDUs  
47  
48 and NIDUs in Lashio, where HIV prevalence among IDUs has been one of the highest  
49  
50 in Myanmar.<sup>13</sup> The HIV testing rate among IDUs was higher compared to that among  
51  
52 NIDUs' where harm reduction programs were implemented, especially where such  
53  
54  
55  
56  
57  
58  
59  
60

1  
2  
3  
4  
5  
6 programs targeted IDUs. Such harm reduction programs include primary health care  
7  
8  
9 services, needle and syringe exchange programs, recreational activities (tea, video,  
10  
11 sports, and games), and drug/HIV counseling.<sup>16</sup> Among IDUs, 76.6% had ever tested  
12  
13 for HIV, while 45.7% of NIDUs had ever tested for HIV. These percentages are much  
14  
15 higher compared to one-year testing rates reported among Italian drug users: 37.4% for  
16  
17 IDUs and 28% for NIDUs.<sup>17</sup> Nonetheless, a comparably high HIV testing rate (76.2%)  
18  
19 in the past 6 months was reported among Thai IDUs.<sup>18</sup>

20  
21  
22  
23  
24  
25  
26 HIV testing was positively associated with ever having received drug treatment  
27  
28 and with perception of personal risk of HIV infection among both IDUs and NIDUs.  
29  
30  
31 IDUs who had a regular job at the time of survey were also more likely to have  
32  
33 undergone HIV testing. Married IDUs and IDUs who injected at least twice daily,  
34  
35  
36  
37  
38  
39  
40  
41  
42  
43  
44  
45  
46  
47  
48  
49  
50  
51  
52  
53  
54  
55  
56  
57  
58  
59  
60  
NIDUs of Shan or Kachin ethnicity and who reported poly drug use within the last three  
months were less likely to have undergone HIV testing.

Notably, both IDUs and NIDUs who had ever received drug treatment were  
more likely to have been tested for HIV. This finding is in line with studies conducted in  
similar populations globally. In Vietnam, female sex workers who spent time in a

1  
2  
3  
4  
5  
6 rehabilitation center were more likely to have tested for HIV.<sup>19</sup> Moreover, IDUs in Italy  
7  
8  
9 who had ever received both pharmacological and psychological treatments were more  
10  
11  
12 likely to have tested for HIV than were those who underwent only one kind of  
13  
14  
15 treatment.<sup>17</sup>

16  
17  
18 Drug treatment is playing an important role to reduce risk of HIV infection  
19  
20 among IDUs and NIDUs alike.<sup>20</sup> However, HIV testing is not currently a compulsory  
21  
22 service at drug treatment centers (DTCs) in Myanmar unless a drug user undergoing  
23  
24 detoxification requests it. Since HIV testing and counseling effectively reduce risk  
25  
26 behaviors in drug using populations, the United States Centers for Disease Control and  
27  
28  
29 Prevention recommends that HIV testing should be integrated into drug treatment  
30  
31  
32 services.<sup>20</sup> Expanding drug treatment to incorporate HIV testing services may increase  
33  
34  
35 the number of IDUs and NIDUs accessing HIV testing services in Myanmar, too.  
36  
37  
38  
39

40  
41 In the present study, NIDUs who registered as drug users in the Government  
42  
43 facilities were more likely to have been tested for HIV. Registration as a drug user is a  
44  
45 way to access drug treatment, including MMT and other medical services, at  
46  
47  
48 government-run facilities in Myanmar. Following registration, a drug user is scheduled  
49  
50 to receive a minimum of six weeks compulsory detoxification. Drug users who fail to  
51  
52  
53 register or do not comply with treatment may result in face a three-to-five-year prison  
54  
55  
56  
57  
58  
59  
60



1  
2  
3  
4  
5  
6 sentence. Currently, drug treatment in Myanmar is provided through 26 major DTCs,  
7  
8  
9 with a 450 bed capacity per day, and 40 minor DTCs.<sup>21</sup> Encouraging drug users to  
10  
11  
12 register as such may be effective to increase the uptake of HIV testing services among  
13  
14  
15 drug users. Nevertheless, most of the drug users surveyed were reluctant to register their  
16  
17  
18 drug use due to several barriers, including stigma toward drug addicts, financial  
19  
20  
21 problems,<sup>22</sup> fear of being known as a drug user, low perceived efficacy of available  
22  
23  
24 treatment, and the possibility of losing employment opportunities.<sup>23 24</sup>

25  
26         Among both IDUs and NIDUs, those who had engaged in high-risk behaviors  
27  
28  
29 were less likely to have tested for HIV. Additionally, IDUs who injected at least twice  
30  
31  
32 daily as well as IDUs and NIDUs who used more than two drugs (poly drug use) were  
33  
34  
35 less likely to have been tested for HIV. A similar finding was reported in Thailand,  
36  
37  
38 where IDUs who practiced high-risk behaviors were also less likely to undergo HIV  
39  
40  
41 testing.<sup>18</sup> It is not surprising that drug users are more prone to feel reticent to learn of  
42  
43  
44 their HIV status through testing due to their risky behaviors<sup>25</sup>, and to  
45  
46  
47 stigma/discrimination related to drug use and its illegality.<sup>19 26</sup> However, injecting drug  
48  
49  
50 use is the main mode of HIV transmission in Myanmar,<sup>23</sup> and studies indicate that  
51  
52  
53 poly drug users are especially likely to practice unsafe sexual behaviors.<sup>27 28</sup> HIV  
54  
55  
56 transmission among drug users engaging in risky behaviors might thus be fueling the  
57  
58  
59  
60

1  
2  
3  
4  
5  
6 HIV epidemic in Myanmar. Hence, HIV testing programs targeting drug users who  
7  
8  
9 exhibit high-risk behaviors are urgently needed, and such programs might also fruitfully  
10  
11  
12 incorporate educational campaigns toward reducing discrimination against drug use.  
13

14  
15 In this study, perceived risk of HIV infection was a significant predictor for  
16  
17 HIV testing among both types of drug users (i.e. IDUs and NIDUs). Such individuals  
18  
19 may perceive themselves as at risk of HIV infection after learning their partner's HIV  
20  
21 status,<sup>29</sup> or they may be compelled to consider the implications of their risky drug use  
22  
23 and sexual behaviors<sup>30</sup>, prompting them to seek HIV counseling and to have their HIV  
24  
25 status tested. In this study, we did not confirm participants' HIV status due to ethical  
26  
27 considerations. Regardless of HIV status and risk behaviors, however, perceived risk of  
28  
29 HIV infection would appear to serve as a self-protective behavior which can motivate  
30  
31 individuals to practice safer behaviors.  
32  
33  
34  
35  
36  
37  
38  
39  
40

41 This study showed that IDUs who had a regular job were more likely to have  
42  
43 been tested for HIV infection. One possible explanation for this is that the Myanmar  
44  
45 National AIDS Programs have included the workplace as a priority setting for  
46  
47 intervention/prevention efforts.<sup>31</sup> Thus, IDUs with a regular job are likely to have been  
48  
49 tested for HIV infection through such programs. On the other hand, conflicting findings  
50  
51 have emerged from studies of Russian IDUs<sup>32</sup> and tuberculosis patients from Uganda<sup>33</sup>  
52  
53  
54  
55  
56  
57  
58  
59  
60

1  
2  
3  
4  
5  
6 and Ethiopia.<sup>34</sup> In these studies, unemployed or part-time workers were more likely to  
7  
8  
9 test for HIV than were employed or full-time workers. Further investigation may thus be  
10  
11  
12 necessary to explore the impact of employment status on HIV testing behaviors in  
13  
14  
15 different contexts.

16  
17  
18 In the present study, married IDUs were less likely to have been tested for HIV  
19  
20  
21 than were single IDUs. This is an important finding, as two-fifths of all new HIV  
22  
23  
24 infections in Myanmar occurred through husband-to-wife transmission in 2010.  
25  
26  
27 Moreover, the trend of husband-to-wife transmission is estimated to increase to nearly  
28  
29  
30 half of all new infections among women by 2015.<sup>35</sup> In China, too, married men who  
31  
32  
33 have sex with men (MSM) were less likely to have been tested for HIV than were single  
34  
35  
36 men.<sup>36</sup> Clearly, HIV testing programs urgently need to focus on encouraging married  
37  
38  
39 IDUs to undergo HIV testing.

40  
41  
42 Another important finding was that NIDUs who were of Shan or Kachin  
43  
44  
45 ethnicities were less likely to have tested their HIV status than were those of Burma  
46  
47  
48 ethnicity. This may be because most of the IEC materials, HIV testing information, and  
49  
50  
51 HIV counseling services were conducted in the Myanmar language, with which Shan  
52  
53  
54 and Kachin ethnicities are not always familiar. Owing to a lack of Myanmar language  
55  
56  
57 ability, participants who do not speak or read the Myanmar language may have had  
58  
59  
60

1  
2  
3  
4  
5  
6 difficulty in accessing HIV testing services. Other ethnicities would also benefit if HIV  
7  
8  
9 testing services could be conducted in languages representing a broader range of  
10  
11  
12 ethnicities such as Shan and Kachin, or if the services could employ staff conversant in  
13  
14  
15 the languages of other ethnicities.  
16

17  
18 Our findings are derived from a cross-sectional study; as such, several possible  
19  
20  
21 limitations should be noted in their interpretation. First, HIV testing was self-reported  
22  
23  
24 by drug users, and we were not able to confirm their HIV status. Second, our results  
25  
26  
27 may not be generalized to drug users in other cities or to drug users who did not  
28  
29  
30 participate in this study because they may have different characteristics than those who  
31  
32  
33 participated in the study. However, our findings are generally consistent with those of  
34  
35  
36 another study from Thailand.<sup>18</sup>  
37

38  
39  
40 Despite their potential limitations, our results present the first look at HIV  
41  
42  
43 testing behaviors among drug users in Lashio, Myanmar's famous border trade city,  
44  
45  
46 with a high burden of HIV infection. At the same time, further research is needed to  
47  
48  
49 understand barriers and decisions to access HIV testing among drug users, especially for  
50  
51  
52 those who are married and engaged in risky behaviors.  
53  
54  
55  
56  
57  
58  
59  
60

## Conclusions

Both IDUs and NIDUs who had ever received drug treatment were more likely to have tested for HIV in the present study. More IDUs received HIV testing compared to NIDUs. Low HIV testing rates were found among IDUs who were married and who injected at least twice daily and among NIDUs reporting poly drug use within the last three months and who were of Kachin or Shan ethnicity. To increase HIV testing rates, especially among NIDUs, we need to encourage them to register as drug users and to provide them with HIV services in the Myanmar language as well as in other ethnic languages. Integrating HIV testing into existing drug treatment programs and expanding drug treatment services thus emerges as an effective way to increase utilization of HIV testing among both types of drug users in Myanmar.

## Acknowledgments

The authors would like to thank all the participants who voluntarily participated in this study. We also would like to extend our appreciation to Dr. Yin Thet Nu Oo and Dr. Lin Aung Thu for their support and valuable contributions.

## Funding:

This study has received funding from the University of Tokyo and by the Ito Foundation for International Education Exchange (G 0114) of Tokyo.

**Competing interests:**

None.

**Ethical approval**

The study was approved by the Research Ethics Committee of the Graduate School of Medicine, the University of Tokyo, Japan, and the Institutional Ethical Review Committee, Department of Medical Research (Lower Myanmar), Ministry of Health, Yangon, Myanmar.

**Provenance and peer review**

Not commissioned; externally peer reviewed.

**Data sharing statement**

Extra data are available from the corresponding author.

**Contributing authors:**

Yu Mon Saw and Junko Yasuoka participated in the design of the study, conducted the statistical analyses, and drafted the article. Krishna C. Poudel participated in the analysis and interpreted the results. Yu Mon Saw, Thu Nandar Saw, and Soe Tun oversaw the implementation of the study. Masamine Jimba supervised the study and the revisions to the article. All authors contributed to the writing of the manuscript and approved the final draft.

## References

1. Ministry of Health (MOH), National AIDS Programme. *Global AIDS Response Progress Report Myanmar*. Myanmar. 2012.
2. Soe ZN. Female Drug Users and Services' Accessibility in Burma (Myanmar): *NIDA International Drug Abuse Research Abstract Database*, 2010.(accessed 23 May 2012)
3. Aceijas C, Friedman SR, Cooper HL, *et al.* Estimates of injecting drug users at the national and local level in developing and transitional countries, and gender and age distribution. *Sex Transm Infect* 2006;**82**:iii10-17.
4. Sweat M, Gregorich S, Sangiwa G, *et al.* Cost-effectiveness of voluntary HIV-1 counselling and testing in reducing sexual transmission of HIV-1 in Kenya and Tanzania. *Lancet* 2000;**356**:113-121.
5. Bernstein E, Heeren T, Winter M, *et al.* Long-term follow-up after voluntary human immunodeficiency virus/sexually transmitted infection counseling, point-of-service testing, and referral to substance abuse treatment from the emergency department. *Acad Emerg Med* 2012;**19**:386-395.
6. Chen HT, Liang S, Liao Q, *et al.* HIV voluntary counseling and testing among injection drug users in south China: a study of a non-government organization based program. *AIDS Behav* 2007;**11**:778-788.
7. Kamb ML, Fishbein M, Douglas JM, Jr., *et al.* Efficacy of risk-reduction counseling to prevent human immunodeficiency virus and sexually transmitted diseases: a randomized controlled trial. Project RESPECT Study Group. *JAMA* 1998;**280**:1161-1167.
8. Shain RN, Piper JM, Newton ER, *et al.* A randomized, controlled trial of a behavioral intervention to prevent sexually transmitted disease among minority women. *N Engl J Med* 1999;**340**:93-100.
9. Grusky O, Liu H, Li X, *et al.* Is voluntary counselling and testing of drug users in China feasible? *Int J STD AIDS* 2006;**17**:354-355.
10. UNAIDS. *Fund for HIV/AIDS in Myanmar: Annual Progress Report, 2006-2007. The Joint United Nations Programme on HIV/AIDS, Myanmar*. 2007.
11. Thwe M. Service coverage for HIV and AIDS in Myanmar *The 8th International Congress on AIDS in Asia and the Pacific (ICAAP)*. Colombo, Sri Lanka.2007.

- 1
  - 2
  - 3
  - 4
  - 5
  - 6
  - 7
  - 8
  - 9
  - 10
  - 11
  - 12
  - 13
  - 14
  - 15
  - 16
  - 17
  - 18
  - 19
  - 20
  - 21
  - 22
  - 23
  - 24
  - 25
  - 26
  - 27
  - 28
  - 29
  - 30
  - 31
  - 32
  - 33
  - 34
  - 35
  - 36
  - 37
  - 38
  - 39
  - 40
  - 41
  - 42
  - 43
  - 44
  - 45
  - 46
  - 47
  - 48
  - 49
  - 50
  - 51
  - 52
  - 53
  - 54
  - 55
  - 56
  - 57
  - 58
  - 59
  - 60
12. Qian HZ, Schumacher JE, Chen HT, *et al.* Injection drug use and HIV/AIDS in China: review of current situation, prevention and policy implications. *Harm Reduct J* 2006;**3**:4.
13. Ministry of Health (MOH), National AIDS Programme, Myanmar. *Behavioral Surveillance Survey among Injecting Drug Users and Female Sex Workers*, 2008.
14. Heckathorn DD. Respondent-Driven Sampling: A New Approach to the Study of Hidden Populations. *Social Problems* 1997;**44**:174–199.
15. De Maere W, Singh S, Tun T, *et al.* Rapid Assessment and Action research on drug use and HIV in Lashio, Northern Shan State, Myanmar. *Asian Harm Reduction Network, Myanmar (AHRN-Myanmar)*. 2006.
16. Asian Harm Reduction Network (AHRN), Annual Performance Report, Myanmar 2005.
17. Camoni L, Federico B, Capelli G, *et al.* Few Italian drug users undergo HIV testing. *AIDS Behav* 2011;**15**:711-717.
18. Ti L, Hayashi K, Kaplan K, *et al.* HIV testing and willingness to get HIV testing at a peer-run drop-in centre for people who inject drugs in Bangkok, Thailand. *BMC Public Health* Mar 2012; 13:189.
19. Grayman JH, Nhan DT, Huong PT, *et al.* Factors associated with HIV testing, condom use, and sexually transmitted infections among female sex workers in Nha Trang, Vietnam. *AIDS Behav* 2005;**9**:41-51.
20. Centers for Disease Control and Prevention (CDC). Linking HIV prevention services and substance abuse treatment programs. United State, 2002.
21. Devaney, M., Reid, G., Baldwin, S. Situational analysis of illicit drug issues and responses in the Asia-Pacific region. 2006. Burnet Institute's Centre for Harm Reduction and Turning Point Alcohol and Drug Centre.
22. Appel PW, Ellison AA, Jansky HK, *et al.* Barriers to enrollment in drug abuse treatment and suggestions for reducing them: opinions of drug injecting street outreach clients and other system stakeholders. *Am J Drug Alcohol Abuse* 2004;**30**:129-153.
23. Bobrova N, Rhodes T, Power R, *et al.* Barriers to accessing drug treatment in Russia: a qualitative study among injecting drug users in two cities. *Drug Alcohol Depend* 2006;**82**:S57-63.



- 1
  - 2
  - 3
  - 4
  - 5
  - 6
  - 7
  - 8
  - 9
  - 10
  - 11
  - 12
  - 13
  - 14
  - 15
  - 16
  - 17
  - 18
  - 19
  - 20
  - 21
  - 22
  - 23
  - 24
  - 25
  - 26
  - 27
  - 28
  - 29
  - 30
  - 31
  - 32
  - 33
  - 34
  - 35
  - 36
  - 37
  - 38
  - 39
  - 40
  - 41
  - 42
  - 43
  - 44
  - 45
  - 46
  - 47
  - 48
  - 49
  - 50
  - 51
  - 52
  - 53
  - 54
  - 55
  - 56
  - 57
  - 58
  - 59
  - 60
24. Tucker JA. Resolving problems associated with alcohol and drug misuse: understanding relations between addictive behavior change and the use of services. *Subst Use Misuse* 2001;**36**:1501-1518.
25. Spielberg F, Kurth A, Gorbach PM, *et al*. Moving from apprehension to action: HIV counseling and testing preferences in three at-risk populations. *AIDS Educ Prev* 2001;**13**:524-540.
26. Hayashi K, Milloy MJ, Fairbairn N, *et al*. Incarceration experiences among a community-recruited sample of injection drug users in Bangkok, Thailand. *BMC Public Health* 2009; 30:492.
27. Patterson TL, Semple SJ, Zians JK, *et al*. Methamphetamine-using HIV-positive men who have sex with men: correlates of polydrug use. *J Urban Health* 2005; 82:i120-i126.
28. Fernández MI, Bowen GS, Varga LM, *et al*. High rates of club drug use and risky sexual practices among Hispanic men who have sex with men in Miami, Florida. *Subst Use Misuse* 2005; **40**:1347-62.
29. Adih WK, Alexander CS. Determinants of condom use to prevent HIV infection among youth in Ghana. *J Adolesc Health* 1999;**24**:63-72.
30. Filipe EM, Batistella E, Pine A, *et al*. Sexual orientation, use of drugs and risk perception among HIV-positive men in Sao Paulo, Brazil. *Int J STD AIDS* 2005;**16**:56-60.
31. Ministry of Health (MOH), National AIDS Programme, Myanmar. *UNGASS Country Progress Report Myanmar, 2010*.
32. Niccolai LM, Toussova OV, Verevchkin SV, *et al*. High HIV prevalence, suboptimal HIV testing, and low knowledge of HIV-positive serostatus among injection drug users in St. Petersburg, Russia. *AIDS Behav* 2010;**14**:932-941.
33. Sendagire I, Schreuder I, Mubiru M, *et al*. Low HIV testing rates among tuberculosis patients in Kampala, Uganda. *BMC Public Health* 2010;**10**:177.
34. Jerene D, Endale A, Lindtjorn B. Acceptability of HIV counselling and testing among tuberculosis patients in south Ethiopia. *BMC Int Health Hum Rights* 2007;**7**:4.
35. Myat K. Rise in husband-to-wife HIV infections expected: NGOs. Available from <http://www.mmtimes.com/2010/news/545/54515news.html>. *The Myanmar*

1  
2  
3  
4  
5  
6  
7  
8  
9  
10  
11  
12  
13  
14  
15  
16  
17  
18  
19  
20  
21  
22  
23  
24  
25  
26  
27  
28  
29  
30  
31  
32  
33  
34  
35  
36  
37  
38  
39  
40  
41  
42  
43  
44  
45  
46  
47  
48  
49  
50  
51  
52  
53  
54  
55  
56  
57  
58  
59  
60

*Times* 2010. (accessed 23 May 2012)

36. Wei C, Ruan S, Zhao J, *et al*. Which Chinese men who have sex with men miss out on HIV testing? *Sex Transm Infect* 2011;**87**:225-228.

“The Corresponding Author has the right to grant on behalf of all authors and does grant on behalf of all authors, an exclusive licence (or non-exclusive for government employees) on a worldwide basis to the BMJ Group and co-owners or contracting owning societies (where published by the BMJ Group on their behalf), and its Licensees to permit this article (if accepted) to be published in Sexually Transmitted Infections and any other BMJ Group products and to exploit all subsidiary rights, as set out in our licence.”

For peer review only

1  
2  
3  
4  
5  
6  
7  
8  
9  
10  
11  
12  
13  
14  
15  
16  
17  
18  
19  
20  
21  
22  
23  
24  
25  
26  
27  
28  
29  
30  
31  
32  
33  
34  
35  
36  
37  
38  
39  
40  
41  
42  
43  
44  
45  
46  
47  
48  
49  
50  
51  
52  
53  
54  
55  
56  
57  
58  
59  
60

**Table.1 Socio-demographic characteristics of participants (N=368)**

| Characteristics                                 | Injecting drug user<br>(n=158) |            | Non-injecting<br>drug user (n=210) |            | P-value |
|-------------------------------------------------|--------------------------------|------------|------------------------------------|------------|---------|
|                                                 | n/mean                         | %/SD       | n/mean                             | %/SD       |         |
| <b>Age</b>                                      | <b>29.8</b>                    | <b>7.2</b> | <b>25.5</b>                        | <b>5.8</b> | <0.001  |
| ≤ 20                                            | 17                             | (10.8)     | 40                                 | (19.0)     |         |
| 21-30                                           | 77                             | (48.7)     | 134                                | (63.8)     |         |
| 31-40                                           | 50                             | (31.6)     | 30                                 | (14.3)     |         |
| 41-50                                           | 14                             | (8.9)      | 6                                  | (2.9)      |         |
| <b>Ethnicity</b>                                |                                |            |                                    |            | 0.943   |
| Burma                                           | 35                             | (22.2)     | 45                                 | (21.4)     |         |
| Shan                                            | 46                             | (29.1)     | 66                                 | (31.4)     |         |
| Kachin                                          | 35                             | (22.2)     | 48                                 | (22.9)     |         |
| Others                                          | 42                             | (26.5)     | 51                                 | (24.3)     |         |
| <b>Marital status</b>                           |                                |            |                                    |            | 0.137   |
| Single                                          | 75                             | (47.5)     | 110                                | (52.4)     |         |
| Married                                         | 66                             | (41.8)     | 68                                 | (32.4)     |         |
| Divorced/Widower                                | 17                             | (10.7)     | 32                                 | (15.2)     |         |
| <b>Education</b>                                |                                |            |                                    |            | 0.227   |
| Primary/No formal education                     | 52                             | (32.9)     | 61                                 | (29.0)     |         |
| Secondary education                             | 58                             | (36.7)     | 67                                 | (31.9)     |         |
| High school and higher education                | 48                             | (30.4)     | 82                                 | (39.0)     |         |
| <b>Employment status</b>                        |                                |            |                                    |            | 0.315   |
| Non-regular job                                 | 32                             | (20.3)     | 34                                 | (16.2)     |         |
| Regular job                                     | 126                            | (79.7)     | 176                                | (83.8)     |         |
| <b>Living status (Inter-regional migration)</b> |                                |            |                                    |            | <0.001  |
| Resident                                        | 138                            | (87.3)     | 143                                | (68.1)     |         |
| Migrant                                         | 20                             | (12.7)     | 67                                 | (31.9)     |         |

Mean age 29.8 (SD 7.2) for IDUs and 25.5 (SD 5.8) for NIDUs

1  
2  
3  
4  
5  
6  
7  
8  
9  
10  
11  
12  
13  
14  
15  
16  
17  
18  
19  
20  
21  
22  
23  
24  
25  
26  
27  
28  
29  
30  
31  
32  
33  
34  
35  
36  
37  
38  
39  
40  
41  
42  
43  
44  
45  
46  
47  
48  
49  
50  
51  
52  
53  
54  
55  
56  
57  
58  
59  
60

**Table 2. Factors associated with HIV testing among injecting drug user in Lashio, Myanmar (N=158)**

|                                                                      | N   | %    | OR    | 95%CI        | AOR   | 95%CI         |
|----------------------------------------------------------------------|-----|------|-------|--------------|-------|---------------|
| <b>Age</b>                                                           |     |      |       |              |       |               |
| ≤ 29                                                                 | 68  | 43.0 |       |              |       |               |
| > 29                                                                 | 90  | 57.0 | 2.57  | 1.17-5.66*   | 2.06  | 0.63-6.76     |
| <b>Marital status</b>                                                |     |      |       |              |       |               |
| Single                                                               | 75  | 47.4 |       |              |       |               |
| Married                                                              | 66  | 41.8 | 0.61  | 0.28-1.35    | 0.24  | 0.06-0.94*    |
| Divorced/Widower                                                     | 17  | 10.8 | 0.55  | 0.17-1.82    | 0.26  | 0.04-1.94     |
| <b>Education</b>                                                     |     |      |       |              |       |               |
| Primary/No formal education                                          | 61  | 29.0 |       |              |       |               |
| Secondary education                                                  | 67  | 31.9 | 1.57  | 0.64-3.86    | 2.59  | 0.63-10.60    |
| High school or above                                                 | 82  | 39.1 | 1.11  | 0.45-2.71    | 1.82  | 0.29-4.86     |
| <b>Ethnicity</b>                                                     |     |      |       |              |       |               |
| Burma                                                                | 35  | 22.2 |       |              |       |               |
| Shan                                                                 | 46  | 29.0 | 0.93  | 0.27-3.22    | 2.15  | 0.32-14.57    |
| Kachin                                                               | 35  | 22.2 | 0.22  | 0.07-0.71*   | 0.58  | 0.11-2.94     |
| Others                                                               | 42  | 26.6 | 0.53  | 0.16-1.74    | 0.83  | 0.16-4.27     |
| <b>Employment status</b>                                             |     |      |       |              |       |               |
| Non-regular job                                                      | 32  | 20.3 |       |              |       |               |
| Regular job                                                          | 126 | 79.7 | 2.91  | 1.26-6.70*   | 4.50  | 1.08-23.17*   |
| <b>Living status (Inter-regional migration)</b>                      |     |      |       |              |       |               |
| Migrant                                                              | 20  | 12.7 |       |              |       |               |
| Resident                                                             | 138 | 87.3 | 0.80  | 0.25-2.55    | 0.81  | 0.14-4.81     |
| <b>Most used drug type in the past 3 months</b>                      |     |      |       |              |       |               |
| Heroin                                                               | 156 | 98.7 | S/S   |              | S/S   |               |
| Stimulant and others                                                 | 2   | 1.3  |       |              |       |               |
| <b>Had history of poly drug use in the past 3 months</b>             |     |      |       |              |       |               |
| Never                                                                | 83  | 52.5 |       |              |       |               |
| Ever                                                                 | 75  | 47.5 | 0.40  | 0.18-0.85*   | 0.44  | 0.14-1.43     |
| <b>Had history of unsafe injection practice in the past 3 months</b> |     |      |       |              |       |               |
| No                                                                   | 107 | 52.5 |       |              |       |               |
| Yes                                                                  | 51  | 47.5 | 1.72  | 0.76-3.86    | 1.01  | 0.27-3.84     |
| <b>Frequency of injection per day</b>                                |     |      |       |              |       |               |
| ≤ 2                                                                  | 86  | 54.4 |       |              |       |               |
| > 2                                                                  | 72  | 45.6 | 0.41  | 0.19-0.88*   | 0.30  | 0.09-0.97*    |
| <b>Had history of FSW visit in the past 3 months</b>                 |     |      |       |              |       |               |
| Never                                                                | 73  | 46.2 |       |              |       |               |
| Ever                                                                 | 85  | 53.8 | 0.74  | 0.35-1.56    | 1.34  | 0.25-7.12     |
| <b>Sexual orientation</b>                                            |     |      |       |              |       |               |
| Hetero-sexual                                                        | 135 | 85.4 |       |              |       |               |
| Bi/Homo-sexual                                                       | 23  | 14.6 | 0.21  | 0.08-0.53**  | 0.61  | 0.13-2.84     |
| <b>Had more than one partners in the past 3 months</b>               |     |      |       |              |       |               |
| No                                                                   | 73  | 46.2 |       |              |       |               |
| Yes                                                                  | 85  | 53.8 | 0.40  | 0.18-0.89*   | 0.20  | 0.04-1.11     |
| <b>Ever received drug treatment</b>                                  |     |      |       |              |       |               |
| No                                                                   | 31  | 19.6 |       |              |       |               |
| Yes                                                                  | 127 | 80.4 | 14.57 | 5.82-36.47** | 13.07 | 3.38-50.53*** |
| <b>Ever register as a drug user</b>                                  |     |      |       |              |       |               |
| No                                                                   | 78  | 49.4 |       |              |       |               |
| Yes                                                                  | 80  | 50.6 | 5.33  | 2.25-12.62** | 2.21  | 0.57-8.63     |
| <b>Ever been in prison or jail</b>                                   |     |      |       |              |       |               |
| No                                                                   | 106 | 67.1 |       |              |       |               |
| Yes                                                                  | 52  | 32.9 | 0.56  | 0.26-1.19    | 0.44  | 0.10-1.84     |
| <b>Perceived HIV risk</b>                                            |     |      |       |              |       |               |
| No                                                                   | 90  | 57.0 |       |              |       |               |
| Yes                                                                  | 68  | 43.9 | 3.57  | 1.51-8.43**  | 5.70  | 1.40-23.25*   |

Note. OR: odd Ratio; CI: confidence interval; AOR: adjusted odd ratio; FSW: female sex worker  
<sup>§</sup> Had either receptive or distributive needle/syringe sharing  
\* p <0.05; \*\* p <0.01; \*\*\* p <0.001; S/S=small sample size

1  
2  
3  
4  
5  
6  
7  
8  
9  
10  
11  
12  
13  
14  
15  
16  
17  
18  
19  
20  
21  
22  
23  
24  
25  
26  
27  
28  
29  
30  
31  
32  
33  
34  
35  
36  
37  
38  
39  
40  
41  
42  
43  
44  
45  
46  
47  
48  
49  
50  
51  
52  
53  
54  
55  
56  
57  
58  
59  
60

|                                                          | N   | %    | OR   | 95%CI       | AOR  | 95%CI        |
|----------------------------------------------------------|-----|------|------|-------------|------|--------------|
| <b>Age</b>                                               |     |      |      |             |      |              |
| ≤ 25                                                     | 116 | 55.2 |      |             |      |              |
| > 25                                                     | 94  | 44.8 | 1.17 | 0.68-2.02   | 0.75 | 0.33-1.71    |
| <b>Marital status</b>                                    |     |      |      |             |      |              |
| Single                                                   | 110 | 52.4 |      |             |      |              |
| Married                                                  | 68  | 32.4 | 0.62 | 0.33-1.15   | 0.52 | 0.22-1.21    |
| Divorced/Widower                                         | 32  | 15.2 | 0.88 | 0.40-1.94   | 0.39 | 0.13-1.18    |
| <b>Education</b>                                         |     |      |      |             |      |              |
| Primary/No formal education                              | 52  | 32.9 |      |             |      |              |
| Secondary education                                      | 58  | 36.7 | 2.04 | 1.01-4.13   | 2.38 | 0.95-5.97    |
| High school or above                                     | 48  | 30.4 | 1.29 | 0.66-2.55   | 1.48 | 0.58-3.77    |
| <b>Ethnicity</b>                                         |     |      |      |             |      |              |
| Burma                                                    | 45  | 21.4 |      |             |      |              |
| Shan                                                     | 66  | 31.4 | 0.28 | 0.12-0.62*  | 0.30 | 0.11-0.84*   |
| Kachin                                                   | 48  | 22.9 | 0.21 | 0.09-0.49** | 0.30 | 0.10-0.87*   |
| Others                                                   | 51  | 24.3 | 0.43 | 0.19-1.00   | 0.52 | 0.18-1.49    |
| <b>Employment status</b>                                 |     |      |      |             |      |              |
| Non-regular job                                          | 34  | 16.2 |      |             |      |              |
| Regular job                                              | 176 | 83.8 | 1.67 | 0.78-3.59   | 1.35 | 0.44-4.14    |
| <b>Living status (Inter-regional migration)</b>          |     |      |      |             |      |              |
| Migrant                                                  | 67  | 31.9 |      |             |      |              |
| Resident                                                 | 143 | 68.1 | 0.52 | 0.29-0.94*  | 0.55 | 0.26-1.17    |
| <b>Most used drug type in the past 3 months</b>          |     |      |      |             |      |              |
| Heroin                                                   | 87  | 41.4 |      |             |      |              |
| Stimulant and others                                     | 123 | 58.6 | 1.15 | 0.66-2.00   | 1.54 | 0.63-3.79    |
| <b>Had history of poly drug use in the past 3 months</b> |     |      |      |             |      |              |
| Never                                                    | 58  | 27.6 |      |             |      |              |
| Ever                                                     | 152 | 72.4 | 0.40 | 0.21-0.74*  | 0.33 | 0.14-0.77**  |
| <b>Had history of FSW visit in the past 3 months</b>     |     |      |      |             |      |              |
| Never                                                    | 80  | 38.1 |      |             |      |              |
| Ever                                                     | 130 | 61.9 | 0.50 | 0.29-0.88*  | 0.63 | 0.30-1.33    |
| <b>Sexual orientation</b>                                |     |      |      |             |      |              |
| Hetero-sexual                                            | 76  | 36.2 |      |             |      |              |
| Bi/Homo-sexual                                           | 134 | 63.8 | 1.77 | 0.99-3.14   | 1.72 | 0.73-4.03    |
| <b>Had more than one partners in the past 3 months</b>   |     |      |      |             |      |              |
| No                                                       | 35  | 16.7 |      |             |      |              |
| Yes                                                      | 175 | 83.3 | 0.87 | 0.42-1.80   | 0.80 | 0.27-2.38    |
| <b>Ever received drug treatment</b>                      |     |      |      |             |      |              |
| No                                                       | 139 | 66.2 |      |             |      |              |
| Yes                                                      | 71  | 33.8 | 2.73 | 1.51-4.92** | 3.58 | 1.38-9.24**  |
| <b>Ever register as a drug user</b>                      |     |      |      |             |      |              |
| No                                                       | 173 | 82.4 |      |             |      |              |
| Yes                                                      | 37  | 17.6 | 3.48 | 1.61-7.49** | 4.38 | 1.31-14.65** |
| <b>Ever been in prison or jail</b>                       |     |      |      |             |      |              |
| No                                                       | 174 | 82.9 |      |             |      |              |
| Yes                                                      | 36  | 17.1 | 1.08 | 0.52-2.21   | 1.28 | 0.35-4.65    |
| <b>Perceived HIV risk</b>                                |     |      |      |             |      |              |
| No                                                       | 120 | 57.1 |      |             |      |              |
| Yes                                                      | 90  | 42.9 | 3.29 | 1.86-5.83*  | 4.46 | 2.06-9.65*** |

Note. OR: odd Ratio; CI: confidence interval; AOR: adjusted odd ratio; FSW: female sex worker  
\* p <0.05; \*\* p <0.01; \*\*\* p <0.001; S/S=small sample size

1  
2  
3  
4  
5 | Factors associated with HIV testing among male injecting and non-injecting drug users  
6 in Lashio, Myanmar: A cross-sectional study  
7  
8

9  
10 | Yu Mon Saw<sup>1</sup>, Junko Yasuoka<sup>1</sup>, Thu Nandar Saw<sup>1</sup>, Krishna C. Poudel<sup>2</sup>, Soe Tun<sup>3</sup>,  
11 Masamine Jimba<sup>1</sup>  
12

13  
14 <sup>1</sup>*Department of Community and Global Health, Graduate School of Medicine, the*  
15 *University of Tokyo, Tokyo, Japan*  
16

17  
18 <sup>2</sup>*Department of Public Health, School of Public Health and Health Science, University*  
19 *of Massachusetts Amherst, Amherst, MA, USA*  
20

21  
22 <sup>3</sup>*Department of Preventive and Social Medicine, the University of Medicine 2,*  
23 *Yangon, Myanmar*  
24  
25  
26

27 | \*Corresponding author:

28 | Junko Yasuoka, D.Sc., M.P.H  
29 | Department of Community and Global Health  
30 | Graduate School of Medicine  
31 | The University of Tokyo  
32 | 7-3-1 Hongo, Bunkyo-ku, Tokyo 113-0033, Japan  
33 | E- mail: [jyasuoka@post.harvard.edu](mailto:jyasuoka@post.harvard.edu)  
34 | [Tel: +81\(0\)3-5844-3698](tel:+81(0)3-5844-3698)  
35 | [Fax: +81\(0\)3-5841-3422](tel:+81(0)3-5841-3422)  
36  
37  
38  
39  
40  
41  
42  
43  
44  
45  
46  
47  
48  
49  
50  
51

52 | Word counts: Abstract 253, Main Text 3543; No. of Tables: 3  
53  
54  
55  
56  
57  
58  
59  
60

## Abstract

**Objectives:** HIV testing is an effective intervention for reducing HIV risk and providing information on HIV status. However, uptake of HIV testing is a major challenge within the drug-using population due to [the stigma and discrimination associated with](#) their illegal drug use behaviors. This study [thus](#) aimed to identify factors associated with HIV testing among injecting (IDUs) and non-injecting drug users (NIDUs) in Lashio, Myanmar.

**Methods:** A cross-sectional study was conducted from January to February 2010. In total, 158 male IDUs and 210 male NIDUs were recruited using a respondent-driven sampling method. [Multivariate](#) analysis was performed separately for IDUs and NIDUs.

**Results:** Approximately 77% of IDUs and 46% of NIDUs were ever tested for HIV. The multivariate analysis revealed that having ever received drug treatment was positively associated with HIV testing among both IDUs (adjusted odds ratio [AOR] 13.07; 95% confidence interval [CI]: 3.38-50.53) and NIDUs (AOR 3.58; 95%\_CI: 1.38-9.24). IDUs who were married (AOR 0.24; 95%\_CI: 0.06-0.94) and who injected [at least twice daily](#) (AOR 0.30; 95%CI: 0.09-0.97) were less likely to [undergo HIV testing](#). Among NIDUs, those who belonged to Shan (AOR 0.30; 95%CI: 0.11-0.84) or Kachin (AOR 0.30; 95%CI: 0.10-0.87) ethnicities were less likely to test for HIV.

**Conclusions:** [IDUs and NIDUs](#) who [have](#) received drug treatment [are](#) more likely to test for HIV. [Integrating HIV testing into drug treatment programs alongside general expansion of HIV testing services may be effective to increase HIV testing uptake among both IDUs and NIDUs in the Northern Shan State of Myanmar.](#)

**Key words:** HIV, drug users, diagnosis, Myanmar

## Introduction

Myanmar is one of the countries hardest hit by the HIV epidemic in South-East Asia.

According to [the Joint United Nations Programme on AIDS \(UNAIDS\)](#), approximately 240,000 people were living with HIV/AIDS [at the end of 2011](#), and HIV prevalence was 0.5% [within Myanmar's](#) adult population.<sup>1</sup> Injecting drug use is a primary mode of HIV transmission in the country. The estimated number of drug users in 2008 was 300,000-400,000, of whom 90,000-150,000 were injecting drug users (IDUs).<sup>2,3</sup> HIV prevalence among IDUs was 21.9 % in 2011.<sup>1</sup> To tackle this problem, Myanmar has actively promoted condom use, improved the management of sexually transmitted infections (STIs), and made access to HIV testing and counseling services [more](#) widespread.

HIV testing is a highly cost-effective intervention for [reduction of](#) HIV risk and transmission.<sup>4</sup> Early discovery of HIV infection in individuals is essential to provide HIV-related [care and treatment](#), and to prevent further spread of [the disease to others](#). In addition, HIV testing and counseling can increase knowledge of HIV/AIDS, reduce risky sexual and drug use behaviors, and prevent other STIs.<sup>5-9</sup> It is therefore important to encourage IDUs and non-injecting drug users (NIDUs) to be tested for HIV infection.

In Myanmar, both the government and international non-governmental organizations (INGOs) [have been](#) providing a variety of HIV testing services including



1  
2  
3  
4  
5  
6 referrals and pre- and post-test counseling.<sup>10</sup> By the end of 2006, 289 service delivery  
7  
8  
9 points were providing HIV testing services in Myanmar – 53% implemented through  
10  
11  
12 the government sector, and 47% through INGOs.<sup>11</sup> However, HIV testing uptake has  
13  
14  
15 been a major challenge within the drug using populations. Due to varying levels of  
16  
17  
18 stigma and discrimination associated with drug use and its illegality, access to  
19  
20  
21 mainstream public health services is often limited in the drug using population.<sup>12</sup> [In](#)  
22  
23 [Myanmar, drug treatment, including methadone maintenance treatment \(MMT\), is](#)  
24  
25 [provided through government run medical facilities, and HIV testing is not a](#)  
26  
27 [compulsory service in the treatment.](#)

28  
29  
30  
31  
32 [Despite the critical importance of these population sub-groups to HIV](#)  
33  
34 [prevention and treatment efforts](#), only limited information is available on the  
35  
36  
37 characteristics of both IDUs and NIDUs undergoing HIV testing [in Myanmar](#). Therefore,  
38  
39  
40  
41 the purpose of this study was to identify the characteristics of IDUs and NIDUs  
42  
43 [undergoing](#) HIV testing, and to identify factors associated with testing uptake in Lashio  
44  
45  
46 Township, Northern Shan State, Myanmar.

## 51 **Methods**

### 52 **Study design and area**

53  
54  
55  
56  
57 A cross-sectional study was conducted in Lashio city [in the](#) Northern Shan State of  
58  
59  
60

1  
2  
3  
4  
5  
6 Myanmar, a small hill-town located close to the Chinese border. Data were collected in  
7  
8  
9 January and February 2010. Lashio is one of the townships in Myanmar recommended  
10  
11 [as a priority focus](#) for HIV interventions due to the high HIV prevalence among IDUs –  
12  
13 48.5 % in 2007.<sup>13</sup> [Information on HIV prevalence](#) among NIDUs, [meanwhile, is](#) not  
14  
15 available in Myanmar.  
16  
17  
18  
19

### 20 **Study Participants**

21  
22  
23  
24 In this study, IDUs were defined as individuals having [ing](#) visible signs of injection, [as](#)  
25  
26 [confirmed by medical personnel in a private setting](#), and/or who [had](#) injected drugs in  
27  
28 the past 6 months. NIDUs were defined as those with no history of injecting drug use  
29  
30 and those who [had](#) used drugs by a non-injecting route in the past 6 months. Study  
31  
32 participants were recruited using the following criteria: 1) male IDU [or](#) NIDU, 2) aged  
33  
34 18 years or older, 3) had used drugs in the last 6 months, 4) [exhibiting no withdrawal](#)  
35  
36 [symptoms and not under the influence of drugs at the time of interview](#), and 5) able to  
37  
38 speak [the](#) Myanmar language.  
39  
40  
41  
42  
43  
44  
45

46  
47 A total of 176 IDUs and 217 NIDUs were [ultimately](#) enrolled in [the](#) study. Of  
48  
49 them, 18 IDUs and 7 NIDUs were excluded from analysis because of incomplete  
50  
51 responses. The remaining participants, 158 IDUs and 210 NIDUs, were included in the  
52  
53 data analysis.  
54  
55  
56  
57  
58  
59  
60

## Sampling method

A respondent-driven sampling (RDS) method was used to recruit participants as an approach generally regarded as effective for reaching hidden populations.<sup>14</sup> The method uses dual incentives and a structured coupon disbursement process of “peer referral” to reduce typical flaws and biases inherent in sampling of hidden populations’. The first round respondents, also known as “seeds”, were recruited from the pool of service-recipients at a local drop-in center (DIC). From three seeds (two IDUs and one NIDU) were recruited a total of 174 IDUs and 216 NIDUs (not including seeds) meeting the study criteria. The recruitment process did not distinguish between IDUs and NIDUs. Both IDUs and NIDUs were allowed to recruit any friends who used drugs by either means of administration. Distribution of coupons was terminated when the target sample size was attained. The successfully recruited participant was then provided with three coupons with serial numbers and instructions for passing those coupons to peers who were currently using drugs. Coupons were given a 2-week expiration date. The second respondent was also recruited in the same way.

All respondents recruited in this manner received an Information, Education and Communication (IEC) pack that included two condoms with gel packs along with an

1  
2  
3  
4  
5  
6 incentive of 2000 Kyats (US\$ 2.5) as compensation for their time and travel.  
7  
8

9 Respondents were eligible to receive a secondary incentive if recruits referred through  
10  
11 them showed up at study sites to participate within the [expiration](#) period [designated on](#)  
12  
13 their recruitment coupons. The secondary incentive was 500 kyats (0.5\$) per  
14  
15 recruitment.  
16  
17  
18  
19

## 20 21 22 **Measures**

23  
24 The dependent variable was ever [experience of HIV testing](#). [Specific](#) HIV testing  
25  
26 behavior-[related](#) variables included ever [having](#) undergone an HIV test, HIV testing  
27  
28 frequency, date of [last](#) HIV testing, and site of [last](#) HIV testing. The independent  
29  
30 variables were socio-demographic characteristics, drug use, sexual [history](#), HIV testing  
31  
32 behaviors, and health service utilization behaviors.<sup>13 15</sup> [Assessed socio-demographic](#)  
33  
34 [variables included age \(IDUs: <29 years old vs. >29 years old; NIDUs: <25 years old vs.](#)  
35  
36 [>25 years old\), marital status \(single vs. married vs. divorced/widowed\), race/ethnicity](#)  
37  
38 [\(Burma vs. Shan vs. Kachin vs. Other\), educational background \(primary/ no formal](#)  
39  
40 [education vs. secondary education vs. high school or above\), employment \(non-regular](#)  
41  
42 [job vs. regular job\), and Lashio residence status \(migrant vs. resident\).](#)  
43  
44  
45  
46  
47  
48  
49  
50  
51

52  
53 [Variables on drug use and sexual behaviors included type of illicit drug use,](#)  
54  
55 [route of administration for drug use, frequency of injecting drug use, unsafe injecting](#)  
56  
57  
58  
59  
60

1  
2  
3  
4  
5  
6 practice (receptive or distributive syringe sharing; yes vs. no), poly drug use (yes vs. no),  
7  
8  
9 disclosure of sexual orientation (hetero- vs. bi/homosexual), having more than one  
10  
11 partner (yes vs. no), and history of female sex worker visit (yes vs. no). Variables  
12  
13 regarding health services utilization included ever undergoing drug rehabilitation  
14  
15 treatment (yes vs. no), ever registered as a drug user (yes vs. no), and ever convicted for  
16  
17 drug-related crimes (yes vs. no). All variables were measured for the past 6 months,  
18  
19 unless otherwise stated.

20  
21  
22  
23  
24  
25 \_\_\_\_\_ The contents of the study questionnaire were adapted from several different  
26  
27 studies previously conducted in Myanmar. The socio-demographic characteristics, drug  
28  
29 use behavior, and health service utilization-related questions were adapted from the  
30  
31 Rapid Assessment and Response on Drug Use and from the HIV Survey of the Asian  
32  
33 Harm Reduction Network, Myanmar.<sup>15</sup> Sexual behavior and HIV testing behavior-  
34  
35 related questions were adapted from the Behavioral Surveillance Survey (BSS)  
36  
37 Questionnaire of the Ministry of Health, Myanmar.<sup>13</sup> Pre-testing of the full  
38  
39 questionnaire used in this study was carried out prior to data collection in Lashio with  
40  
41 20 IDUs and 20 NIDUs.  
42  
43  
44  
45

#### 46 47 **Data collection**

48  
49  
50 After obtaining written informed consent from each participant, the lead researcher and  
51  
52 six trained interviewers conducted interviews toward data collection. Participants were  
53  
54 interviewed individually for 30-40 minutes in a private setting. Most interviews were  
55  
56  
57  
58  
59  
60

1  
2  
3  
4  
5  
6 conducted at a DIC. [The research team also](#) went [to various field sites \(shooting gallery,](#)  
7  
8  
9 [drug users' homes, cemetery, etc.\)](#) to recruit participants who were willing to participate  
10  
11  
12 in [the](#) study [but did not want to come to the DIC.](#)  
13

### 14 15 16 17 **Data analysis**

18  
19  
20 Data were coded and entered using the Statistical Package for the Social Sciences  
21  
22 (SPSS) version 16 (SPSS Inc., Chicago, IL, USA) for all analyses. Data analysis was  
23  
24  
25 carried out separately for IDUs and NIDUs. Descriptive statistics and  $\chi^2$  tests were used  
26  
27  
28 to compare [participants'](#) background characteristics. Bivariate analyses were initially  
29  
30  
31 conducted to examine factors associated with HIV testing. Finally, all covariates [were](#)  
32  
33  
34 simultaneously entered into [the](#) multiple regression model to calculate adjusted odds  
35  
36  
37 ratios (AORs), 95% confidence intervals (CIs), and corresponding *P*-values.  
38  
39  
40  
41

### 42 **Ethical considerations**

43  
44  
45 This study [protocol](#) was approved by the Research Ethics Committee of the Graduate  
46  
47  
48 School of Medicine, the University of Tokyo, Japan and [by](#) the Institutional Ethical  
49  
50  
51 Review Committee [of the](#) Department of Medical Research (Lower Myanmar), Ministry  
52  
53  
54 of Health, Yangon, Myanmar. The objectives of the study were made clear to  
55  
56  
57 respondents before their voluntary participation, and individual written informed  
58  
59  
60

1  
2  
3  
4  
5  
6 consent was obtained from all participants. Each participant was allowed to withdraw  
7  
8  
9 from the study at any time. Confidentiality of the entire data set was maintained at all  
10  
11  
12 stages of data collection and analysis.

## 13 14 15 16 17 **Results**

### 18 19 **Socio-demographic and drug use characteristics (Table 1)**

20  
21  
22 Of the 368 respondents, 158 were IDUs and 210 were NIDUs. The mean age was  
23  
24 significantly different between IDUs and NIDUs; 29.8 (SD 6.7) years for IDUs and 25.5  
25  
26 (SD 5.8) years for NIDUs ( $P < 0.001$ ). With regard to education levels, about a third of  
27  
28 IDUs and NIDUs had primary or no formal education. Overall, 12.7% of IDUs and a  
29  
30 significantly higher percentage of NIDUs (31.9%) had migrated to Lashio from another  
31  
32 part of Myanmar ( $P < 0.001$ ).  
33  
34  
35  
36  
37  
38  
39  
40  
41  
42

### 43 **Factors associated with HIV testing among injecting drug users (Table 2)**

44  
45 In total, 76.6 % of IDUs had ever tested for HIV. Bivariate analysis showed that those  
46  
47 belonging to the older age group (odds ratio [OR] 2.57; 95% CI: 1.17-5.66) and those  
48  
49 who had a regular job (OR 2.91; 95% CI: 1.26-6.70) were more likely to have tested for  
50  
51 HIV. Conversely, IDUs who practiced risky behaviors such as using more than two  
52  
53 kinds of drugs (poly drugs) (OR 0.40; 95% CI: 0.18-0.85) and injecting drugs at least  
54  
55  
56  
57  
58  
59  
60

1  
2  
3  
4  
5  
6 twice daily (OR 0.41; 95% CI: 0.19-0.88) were less likely to have tested for HIV.  
7  
8

9 Participants who had ever received drug treatment (OR 14.57; 95% CI: 5.82-36.47),  
10  
11 who had ever registered as a drug user (OR 5.33; 2.25-12.62), and who perceived  
12  
13 themselves as being at risk of HIV infection (OR 3.57; 95% CI: 1.51-8.43) were  
14  
15 significantly more likely to have tested for HIV.  
16  
17  
18

19  
20 The multiple regression model for IDUs indicated that those who were married  
21  
22 (AOR 0.24; 95% CI: 0.06-0.94) and who injected drugs at least twice daily (AOR 0.30;  
23  
24 95% CI: 0.09-0.97) were less likely to have tested for HIV. Meanwhile, IDUs having a  
25  
26 regular job (AOR 4.50; 95% CI: 1.08-23.17), who had received drug treatment (AOR  
27  
28 13.07; 95% CI: 3.38-50.53), and who perceived themselves as being at risk of  
29  
30 contracting HIV (AOR 5.70; 95% CI: 1.40-23.25) were more likely to have undergone  
31  
32 HIV testing.  
33  
34  
35  
36  
37  
38  
39  
40  
41  
42  
43

#### 44 **Factors associated with HIV testing among non-injecting drug users (Table 3)**

45  
46 Nearly half of NIDUs (45.7%) had ever tested for HIV. Being of Shan (OR 0.28; 95%  
47  
48 CI: 0.12-0.62) or Kachin (OR 0.21; 95% CI: 0.09-0.49) ethnicity, reporting poly drug  
49  
50 use (OR 0.40; 95% CI: 0.21-0.74), and having visited a female sex worker within the  
51  
52 last 3 months (OR 0.50; 95% CI: 0.29-0.88) were negatively associated with HIV  
53  
54  
55  
56  
57  
58  
59  
60



1  
2  
3  
4  
5  
6 testing. Conversely, NIDUs who had ever received drug treatment (OR 2.73; 95% CI:  
7  
8 1.51-4.92), had ever registered as a drug user (OR 3.48; 95% CI: 1.61-7.49), and who  
9  
10 perceived themselves at being at risk of HIV infection (OR 3.29; 95% CI: 1.86-5.83)  
11  
12 were more likely to have tested for HIV.  
13  
14  
15

16  
17  
18 In the multiple regression model for NIDUs, individuals who were of Shan  
19  
20 (AOR 0.30; 95% CI: 0.11-0.84) or Kachin (AOR 0.30; 95% CI: 0.10-0.87) ethnicity and  
21  
22 who reported poly drug use within the last three months (AOR 0.33; 95% CI: 0.14-0.77)  
23  
24 were less likely to have tested for HIV. Similar results as were observed among IDUs  
25  
26 were [also](#) observed among NIDUs. [Namely](#), NIDUs who had ever received drug  
27  
28 treatment (AOR 3.58; 95% CI: 1.38-9.24), [who had](#) ever registered as a drug user (AOR  
29  
30 4.38; 95% CI: 1.31-14.65), and who perceived themselves as [being](#) at risk of HIV  
31  
32 [infection](#) (AOR 4.46; 95% CI: 2.06-9.65) were more likely to have tested for HIV.  
33  
34  
35  
36  
37  
38  
39  
40  
41  
42  
43

#### 44 Discussion

45  
46 This is the first study to identify factors associated with HIV testing uptake among IDUs  
47  
48 and NIDUs in Lashio, where HIV prevalence among IDUs [has been](#) one of the highest  
49  
50 in Myanmar.<sup>13</sup> [The](#) HIV testing rate [among IDUs](#) was higher compared to that [among](#)  
51  
52 NIDUs' where harm reduction programs were implemented, especially where such  
53  
54  
55  
56  
57  
58  
59  
60

1  
2  
3  
4  
5  
6 programs targeted IDUs. [Such harm reduction programs include primary health care](#)  
7  
8  
9 [services, needle and syringe exchange programs, recreational activities \(tea, video,](#)  
10  
11 [sports, and games\), and drug/HIV counseling.](#) <sup>16</sup> Among IDUs, 76.6% had ever tested  
12  
13 for HIV, while 45.7% of NIDUs had ever tested for HIV. These percentages are much  
14  
15 higher compared to one-year testing rates reported among Italian drug users: 37.4% for  
16  
17 IDUs and 28% for NIDUs.<sup>17</sup> [Nonetheless, a comparably high HIV testing rate \(76.2%\)](#)  
18  
19 [in the past 6 months was reported among Thai IDUs.](#)<sup>18</sup>  
20  
21  
22  
23  
24  
25

26 HIV testing was positively associated with ever [having](#) received drug treatment  
27  
28 and [with](#) perception of personal risk of HIV infection among both IDUs and NIDUs.  
29  
30

31  
32 IDUs who had a regular job at the time of survey were also more likely to have  
33  
34 undergone HIV testing. Married IDUs and IDUs who injected [at](#) least twice [daily](#),  
35  
36  
37 meanwhile, were less likely to have undergone HIV testing. Among NIDUs, those who  
38  
39 had ever registered as a drug user were more likely to have undergone HIV testing.  
40  
41  
42 NIDUs of Shan or Kachin ethnicity and who reported poly drug use within the last three  
43  
44 months were less likely to have undergone HIV testing.  
45  
46  
47  
48

49  
50 Notably, both IDUs and NIDUs who had ever received drug treatment were  
51  
52 more likely to have been tested for HIV. [This finding is in line with studies conducted in](#)  
53  
54 [similar populations globally.](#) In Vietnam, female sex workers who spent time in a  
55  
56  
57  
58  
59  
60

1  
2  
3  
4  
5  
6 rehabilitation center were more likely to have tested for HIV.<sup>19</sup> [Moreover, IDUs](#) in Italy  
7  
8  
9 who had ever received both pharmacological and psychological treatments were more  
10  
11  
12 likely to have tested for HIV than were those who underwent only one kind of  
13  
14  
15 treatment.<sup>17</sup>

16  
17  
18 Drug treatment is playing an important role to reduce risk of HIV infection  
19  
20 among [IDUs and NIDUs alike](#).<sup>20</sup> However, HIV testing is not currently a compulsory  
21  
22 service at drug treatment centers ([DTCs](#)) in Myanmar unless a drug user undergoing  
23  
24 detoxification requests it. Since HIV testing and counseling effectively reduce risk  
25  
26 behaviors in drug using populations, the United States Centers for Disease Control and  
27  
28 Prevention recommends that HIV testing should be integrated into drug treatment  
29  
30 services.<sup>20</sup> Expanding drug treatment to incorporate HIV testing services may increase  
31  
32 the number of IDUs and NIDUs accessing HIV testing services in Myanmar, too.

33  
34  
35  
36  
37  
38  
39  
40 [In the present study](#), NIDUs who registered as drug users in the Government  
41  
42 facilities were more likely to have been tested for HIV. [Registration as a drug user is a](#)  
43  
44 [way to access drug treatment, including MMT and other medical services, at](#)  
45  
46 [government-run facilities in Myanmar. Following registration, a drug user is scheduled](#)  
47  
48 [to receive a minimum of six weeks compulsory detoxification. Drug users who fail to](#)  
49  
50 [register or do not comply with treatment may result in face a three-to-five-year prison](#)  
51  
52  
53  
54  
55  
56  
57  
58  
59  
60

1  
2  
3  
4  
5  
6 [sentence. Currently, drug treatment in Myanmar is provided through 26 major DTCs,](#)  
7  
8  
9 [with a 450 bed capacity per day, and 40 minor DTCs.](#)<sup>21</sup> Encouraging drug users to  
10  
11 register as [such](#) may be effective to increase the uptake of HIV testing services among  
12  
13 [drug users](#). Nevertheless, most of the drug users [surveyed](#) were reluctant to register [their](#)  
14  
15 [drug use](#) due to several barriers, including stigma toward drug addicts, financial  
16  
17 problems,<sup>22</sup> fear of being known as a drug user, [low](#) perceived efficacy of available  
18  
19 treatment, and the possibility of losing employment opportunities.<sup>23 24</sup>

20  
21  
22  
23  
24  
25  
26 [Among](#) both [IDUs and NIDUs](#), those who had engaged in [high-risk](#) behaviors  
27  
28 were less likely to have tested for HIV. [Additionally](#), IDUs who injected [at least](#) twice  
29  
30 [daily as well as](#) IDUs and NIDUs who used more than two drugs (poly drug use) were  
31  
32 less likely to have been tested for HIV. [A similar finding was reported in Thailand,](#)  
33  
34 [where IDUs who practiced high-risk behaviors were also less likely to undergo HIV](#)  
35  
36 [testing.](#)<sup>18</sup> It is not surprising that drug users are more prone to feel [reticent to learn of](#)  
37  
38 [their HIV status through](#) testing due to their risky behaviors<sup>25</sup>, [and to](#)  
39  
40 [stigma/discrimination related to drug use and its illegality.](#)<sup>19 26</sup> [However, injecting drug](#)  
41  
42 [use is the main mode of HIV transmission in Myanmar,](#)<sup>23</sup> [and studies indicate that](#)  
43  
44 [poly drug users are especially likely to practice unsafe sexual behaviors.](#)<sup>27 28</sup> [HIV](#)  
45  
46 [transmission among drug users engaging in risky behaviors might thus be fueling the](#)  
47  
48  
49  
50  
51  
52  
53  
54  
55  
56  
57  
58  
59  
60

1  
2  
3  
4  
5  
6 HIV epidemic in Myanmar. Hence, HIV testing programs targeting drug users who  
7  
8  
9 exhibit high-risk behaviors are urgently needed, and such programs might also fruitfully  
10  
11 incorporate educational campaigns toward reducing discrimination against drug use.

12  
13  
14  
15 \_\_\_\_\_ In this study, perceived risk of HIV infection was a significant predictor for  
16  
17 HIV testing among both types of drug users (i.e. IDUs and NIDUs). Such individuals  
18  
19 may perceive themselves as at risk of HIV infection after learning their partner's HIV  
20  
21 status,<sup>29</sup> or they may be compelled to consider the implications of their risky drug use  
22  
23 and sexual behaviors<sup>30</sup>, prompting them to seek HIV counseling and to have their HIV  
24  
25 status tested. In this study, we did not confirm participants' HIV status due to ethical  
26  
27 considerations. Regardless of HIV status and risk behaviors, however, perceived risk of  
28  
29 HIV infection would appear to serve as a self-protective behavior which can motivate  
30  
31 individuals to practice safer behaviors.  
32  
33  
34  
35  
36  
37  
38  
39  
40

41 This study showed that IDUs who had a regular job were more likely to have  
42  
43 been tested for HIV infection. One possible explanation for this is that the Myanmar  
44  
45 National AIDS Programs have included the workplace as a priority setting for  
46  
47 intervention/prevention efforts.<sup>31</sup> Thus, IDUs with a regular job are likely to have been  
48  
49 tested for HIV infection through such programs. On the other hand, conflicting findings  
50  
51 have emerged from studies of Russian IDUs<sup>32</sup> and tuberculosis patients from Uganda<sup>33</sup>  
52  
53  
54  
55  
56  
57  
58  
59  
60

1  
2  
3  
4  
5  
6 and Ethiopia.<sup>34</sup> In these studies, unemployed or part-time workers were more likely to  
7  
8  
9 test for HIV than were employed or full-time workers. Further investigation may thus be  
10  
11 necessary to explore the impact of employment status on HIV testing behaviors in  
12  
13 different contexts.

14  
15  
16  
17  
18 In the present study, married IDUs were less likely to have been tested for HIV  
19  
20 than were single IDUs. This is an important finding, as two-fifths of all new HIV  
21  
22 infections in Myanmar occurred through husband-to-wife transmission in 2010.  
23  
24 Moreover, the trend of husband-to-wife transmission is estimated to increase to nearly  
25  
26 half of all new infections among women by 2015.<sup>35</sup> In China, too, married men who  
27  
28 have sex with men (MSM) were less likely to have been tested for HIV than were single  
29  
30 men.<sup>36</sup> Clearly, HIV testing programs urgently need to focus on encouraging married  
31  
32 IDUs to undergo HIV testing.

33  
34  
35  
36  
37  
38  
39  
40 Another important finding was that NIDUs who were of Shan or Kachin  
41  
42 ethnicities were less likely to have tested their HIV status than were those of Burma  
43  
44 ethnicity. This may be because most of the IEC materials, HIV testing information, and  
45  
46 HIV counseling services were conducted in the Myanmar language, with which Shan  
47  
48 and Kachin ethnicities are not always familiar. Owing to a lack of Myanmar language  
49  
50 ability, participants who do not speak or read the Myanmar language may have had  
51  
52  
53  
54  
55  
56  
57  
58  
59  
60

1  
2  
3  
4  
5  
6 difficulty in accessing HIV testing services. Other ethnicities would also benefit if HIV  
7  
8  
9 testing services could be conducted in languages representing a broader range of  
10  
11  
12 ethnicities such as Shan and Kachin, or if the services could employ staff conversant in  
13  
14  
15 the languages of other ethnicities.

16  
17  
18 Our findings are derived from a cross-sectional study; as such, several possible  
19  
20 limitations should be noted in their interpretation. First, HIV testing was self-reported  
21  
22 by drug users, and we were not able to confirm their HIV status. Second, our results  
23  
24 may not be generalized to drug users in other cities or to drug users who did not  
25  
26 participate in this study because they may have different characteristics than those who  
27  
28 participated in the study. However, our findings are generally consistent with those of  
29  
30 another study from Thailand.<sup>18</sup>

31  
32  
33  
34  
35  
36  
37  
38 Despite their potential limitations, our results present the first look at HIV  
39  
40 testing behaviors among drug users in Lashio, Myanmar's famous border trade city,  
41  
42 with a high burden of HIV infection. At the same time, further research is needed to  
43  
44 understand barriers and decisions to access HIV testing among drug users, especially for  
45  
46  
47  
48  
49  
50 those who are married and engaged in risky behaviors.

## Conclusions

Both IDUs and NIDUs who had ever received drug treatment were more likely to have tested for HIV [in the present study](#). More IDUs received HIV testing compared to NIDUs. Low HIV testing rates were found among IDUs who were married and who injected [at least twice daily and](#) among NIDUs reporting poly drug use within the last three months and who were of Kachin or Shan ethnicity. To increase HIV testing rates, especially among NIDUs, we need to encourage them to register as drug users and [to provide](#) them with HIV services in [the](#) Myanmar language as well as in [other](#) ethnic languages. Integrating HIV testing into [existing](#) drug treatment [programs](#) and expanding drug treatment services [thus emerges as](#) an effective way to increase utilization of HIV testing among both types of drug users in Myanmar.

## Acknowledgments

The authors would like to thank all the participants who voluntarily participated in this study. We also would like to [extend our appreciation to](#) Dr. Yin Thet Nu Oo and Dr. Lin Aung Thu for their support and [valuable](#) contributions.

## Funding:

This study has received funding from the University of Tokyo and [by](#) the [Ito Foundation for International Education Exchange](#) (G 0114) of Tokyo.



**Competing interests:**

None.

**Ethical approval**

The study was approved by the Research Ethics Committee of the Graduate School of Medicine, the University of Tokyo, Japan, and the Institutional Ethical Review Committee, Department of Medical Research (Lower Myanmar), Ministry of Health, Yangon, Myanmar.

**Provenance and peer review**

Not commissioned; externally peer reviewed.

**Data sharing statement**

Extra data are available from the corresponding author.

**Contributing authors:**

Yu Mon Saw and Junko Yasuoka participated in the design of the study, conducted the statistical analyses, and drafted the article. Krishna C. Poudel participated in the analysis and interpreted the results. Yu Mon Saw, Thu Nandar Saw, and Soe Tun oversaw the implementation of [the](#) study. Masamine Jimba supervised the study and the revisions to the article. All authors contributed to the writing of the manuscript and approved the final [draft](#).

## References

1. Ministry of Health (MOH), National AIDS Programme. *Global AIDS Response Progress Report Myanmar*. Myanmar. 2012.
2. Soe ZN. Female Drug Users and Services' Accessibility in Burma (Myanmar): *NIDA International Drug Abuse Research Abstract Database*, 2010. (accessed 23 May 2012)
3. Aceijas C, Friedman SR, Cooper HL, *et al*. Estimates of injecting drug users at the national and local level in developing and transitional countries, and gender and age distribution. *Sex Transm Infect* 2006;**82**:iii10-17.
4. Sweat M, Gregorich S, Sangiwa G, *et al*. Cost-effectiveness of voluntary HIV-1 counselling and testing in reducing sexual transmission of HIV-1 in Kenya and Tanzania. *Lancet* 2000;**356**:113-121.
5. Bernstein E, Heeren T, Winter M, *et al*. Long-term follow-up after voluntary human immunodeficiency virus/sexually transmitted infection counseling, point-of-service testing, and referral to substance abuse treatment from the emergency department. *Acad Emerg Med* 2012;**19**:386-395.
6. Chen HT, Liang S, Liao Q, *et al*. HIV voluntary counseling and testing among injection drug users in south China: a study of a non-government organization based program. *AIDS Behav* 2007;**11**:778-788.
7. Kamb ML, Fishbein M, Douglas JM, Jr., *et al*. Efficacy of risk-reduction counseling to prevent human immunodeficiency virus and sexually transmitted diseases: a randomized controlled trial. Project RESPECT Study Group. *JAMA* 1998;**280**:1161-1167.
8. Shain RN, Piper JM, Newton ER, *et al*. A randomized, controlled trial of a behavioral intervention to prevent sexually transmitted disease among minority women. *N Engl J Med* 1999;**340**:93-100.
9. Grusky O, Liu H, Li X, *et al*. Is voluntary counselling and testing of drug users in China feasible? *Int J STD AIDS* 2006;**17**:354-355.
10. UNAIDS. *Fund for HIV/AIDS in Myanmar: Annual Progress Report, 2006-2007. The Joint United Nations Programme on HIV/AIDS, Myanmar*. 2007.
11. Thwe M. Service coverage for HIV and AIDS in Myanmar *The 8th International Congress on AIDS in Asia and the Pacific (ICAAP)*. Colombo, Sri Lanka. 2007.

12. Qian HZ, Schumacher JE, Chen HT, *et al.* Injection drug use and HIV/AIDS in China: review of current situation, prevention and policy implications. *Harm Reduct J* 2006;**3**:4.
13. Ministry of Health (MOH), National AIDS Programme, Myanmar. *Behavioral Surveillance Survey among Injecting Drug Users and Female Sex Workers*, 2008.
14. Heckathorn DD. Respondent-Driven Sampling: A New Approach to the Study of Hidden Populations. *Social Problems* 1997;**44**:174–199.
15. De Maere W, Singh S, Tun T, *et al.* Rapid Assessment and Action research on drug use and HIV in Lashio, Northern Shan State, Myanmar: *Asian Harm Reduction Network, Myanmar (AHRN-Myanmar)*. 2006.
16. Asian Harm Reduction Network (AHRN), Annual Performance Report, Myanmar 2005.
17. Camoni L, Federico B, Capelli G, *et al.* Few Italian drug users undergo HIV testing. *AIDS Behav* 2011;**15**:711-717.
18. Ti L, Hayashi K, Kaplan K, *et al.* HIV testing and willingness to get HIV testing at a peer-run drop-in centre for people who inject drugs in Bangkok, Thailand. *BMC Public Health* Mar 2012; 13:189.
19. Grayman JH, Nhan DT, Huong PT, *et al.* Factors associated with HIV testing, condom use, and sexually transmitted infections among female sex workers in Nha Trang, Vietnam. *AIDS Behav* 2005;**9**:41-51.
20. Centers for Disease Control and Prevention (CDC). Linking HIV prevention services and substance abuse treatment programs. United State, 2002.
21. Devaney, M., Reid, G., Baldwin, S. Situational analysis of illicit drug issues and responses in the Asia-Pacific region. 2006. Burnet Institute's Centre for Harm Reduction and Turning Point Alcohol and Drug Centre.
22. Appel PW, Ellison AA, Jansky HK, *et al.* Barriers to enrollment in drug abuse treatment and suggestions for reducing them: opinions of drug injecting street outreach clients and other system stakeholders. *Am J Drug Alcohol Abuse* 2004;**30**:129-153.
23. Bobrova N, Rhodes T, Power R, *et al.* Barriers to accessing drug treatment in Russia: a qualitative study among injecting drug users in two cities. *Drug Alcohol Depend* 2006;**82**:S57-63.

- 1  
2  
3  
4  
5  
6  
7  
8  
9  
10  
11  
12  
13  
14  
15  
16  
17  
18  
19  
20  
21  
22  
23  
24  
25  
26  
27  
28  
29  
30  
31  
32  
33  
34  
35  
36  
37  
38  
39  
40  
41  
42  
43  
44  
45  
46  
47  
48  
49  
50  
51  
52  
53  
54  
55  
56  
57  
58  
59  
60
24. Tucker JA. Resolving problems associated with alcohol and drug misuse: understanding relations between addictive behavior change and the use of services. *Subst Use Misuse* 2001;**36**:1501-1518.
  25. Spielberg F, Kurth A, Gorbach PM, *et al.* Moving from apprehension to action: HIV counseling and testing preferences in three at-risk populations. *AIDS Educ Prev* 2001;**13**:524-540.
  26. Hayashi K, Milloy MJ, Fairbairn N, *et al.* Incarceration experiences among a community-recruited sample of injection drug users in Bangkok, Thailand. *BMC Public Health* 2009; 30:492.
  27. Patterson TL, Semple SJ, Zians JK, *et al.* Methamphetamine-using HIV-positive men who have sex with men: correlates of polydrug use. *J Urban Health* 2005; 82:i120-i126.
  28. Fernández MI, Bowen GS, Varga LM, *et al.* High rates of club drug use and risky sexual practices among Hispanic men who have sex with men in Miami, Florida. *Subst Use Misuse* 2005; **40**:1347-62.
  29. Adih WK, Alexander CS. Determinants of condom use to prevent HIV infection among youth in Ghana. *J Adolesc Health* 1999;**24**:63-72.
  30. Filipe EM, Batistella E, Pine A, *et al.* Sexual orientation, use of drugs and risk perception among HIV-positive men in Sao Paulo, Brazil. *Int J STD AIDS* 2005;**16**:56-60.
  31. Ministry of Health (MOH), National AIDS Programme, Myanmar. *UNGASS Country Progress Report Myanmar, 2010*.
  32. Niccolai LM, Toussova OV, Verevchkin SV, *et al.* High HIV prevalence, suboptimal HIV testing, and low knowledge of HIV-positive serostatus among injection drug users in St. Petersburg, Russia. *AIDS Behav* 2010;**14**:932-941.
  33. Sendagire I, Schreuder I, Mubiru M, *et al.* Low HIV testing rates among tuberculosis patients in Kampala, Uganda. *BMC Public Health* 2010;**10**:177.
  34. Jerene D, Endale A, Lindtjorn B. Acceptability of HIV counselling and testing among tuberculosis patients in south Ethiopia. *BMC Int Health Hum Rights* 2007;**7**:4.
  35. Myat K. Rise in husband-to-wife HIV infections expected: NGOs. Available from <http://www.mmtimes.com/2010/news/545/54515news.html>. *The Myanmar*

1  
2  
3  
4  
5  
6  
7  
8  
9  
10  
11  
12  
13  
14  
15  
16  
17  
18  
19  
20  
21  
22  
23  
24  
25  
26  
27  
28  
29  
30  
31  
32  
33  
34  
35  
36  
37  
38  
39  
40  
41  
42  
43  
44  
45  
46  
47  
48  
49  
50  
51  
52  
53  
54  
55  
56  
57  
58  
59  
60

*Times* 2010. (accessed 23 May 2012)

36. Wei C, Ruan S, Zhao J, *et al*. Which Chinese men who have sex with men miss out on HIV testing? *Sex Transm Infect* 2011;**87**:225-228.

“The Corresponding Author has the right to grant on behalf of all authors and does grant on behalf of all authors, an exclusive licence (or non-exclusive for government employees) on a worldwide basis to the BMJ Group and co-owners or contracting owning societies (where published by the BMJ Group on their behalf), and its Licensees to permit this article (if accepted) to be published in Sexually Transmitted Infections and any other BMJ Group products and to exploit all subsidiary rights, as set out in our licence.”

For peer review only

1  
2  
3  
4  
5  
6  
7  
8  
9  
10  
11  
12  
13  
14  
15  
16  
17  
18  
19  
20  
21  
22  
23  
24  
25  
26  
27  
28  
29  
30  
31  
32  
33  
34  
35  
36  
37  
38  
39  
40  
41  
42  
43  
44  
45  
46  
47  
48  
49  
50  
51  
52  
53  
54  
55  
56  
57  
58  
59  
60

**Table.1 Socio-demographic characteristics of participants (N=368)**

| Characteristics                                 | Injecting drug user<br>(n=158) |            | Non-injecting<br>drug user (n=210) |            | P-value |
|-------------------------------------------------|--------------------------------|------------|------------------------------------|------------|---------|
|                                                 | n/mean                         | %/SD       | n/mean                             | %/SD       |         |
| <b>Age</b>                                      | <b>29.8</b>                    | <b>7.2</b> | <b>25.5</b>                        | <b>5.8</b> | <0.001  |
| ≤ 20                                            | 17                             | (10.8)     | 40                                 | (19.0)     |         |
| 21-30                                           | 77                             | (48.7)     | 134                                | (63.8)     |         |
| 31-40                                           | 50                             | (31.6)     | 30                                 | (14.3)     |         |
| 41-50                                           | 14                             | (8.9)      | 6                                  | (2.9)      |         |
| <b>Ethnicity</b>                                |                                |            |                                    |            | 0.943   |
| Burma                                           | 35                             | (22.2)     | 45                                 | (21.4)     |         |
| Shan                                            | 46                             | (29.1)     | 66                                 | (31.4)     |         |
| Kachin                                          | 35                             | (22.2)     | 48                                 | (22.9)     |         |
| Others                                          | 42                             | (26.5)     | 51                                 | (24.3)     |         |
| <b>Marital status</b>                           |                                |            |                                    |            | 0.137   |
| Single                                          | 75                             | (47.5)     | 110                                | (52.4)     |         |
| Married                                         | 66                             | (41.8)     | 68                                 | (32.4)     |         |
| Divorced/Widower                                | 17                             | (10.7)     | 32                                 | (15.2)     |         |
| <b>Education</b>                                |                                |            |                                    |            | 0.227   |
| Primary/No formal education                     | 52                             | (32.9)     | 61                                 | (29.0)     |         |
| Secondary education                             | 58                             | (36.7)     | 67                                 | (31.9)     |         |
| High school and higher education                | 48                             | (30.4)     | 82                                 | (39.0)     |         |
| <b>Employment status</b>                        |                                |            |                                    |            | 0.315   |
| Non-regular job                                 | 32                             | (20.3)     | 34                                 | (16.2)     |         |
| Regular job                                     | 126                            | (79.7)     | 176                                | (83.8)     |         |
| <b>Living status (Inter-regional migration)</b> |                                |            |                                    |            | <0.001  |
| Resident                                        | 138                            | (87.3)     | 143                                | (68.1)     |         |
| Migrant                                         | 20                             | (12.7)     | 67                                 | (31.9)     |         |

Mean age 29.8 (SD 7.2) for IDUs and 25.5 (SD 5.8) for NIDUs

1  
2  
3  
4  
5  
6  
7  
8  
9  
10  
11  
12  
13  
14  
15  
16  
17  
18  
19  
20  
21  
22  
23  
24  
25  
26  
27  
28  
29  
30  
31  
32  
33  
34  
35  
36  
37  
38  
39  
40  
41  
42  
43  
44  
45  
46  
47  
48  
49  
50  
51  
52  
53  
54  
55  
56  
57  
58  
59  
60

**Table 2. Factors associated with HIV testing among injecting drug user in Lashio, Myanmar (N=158)**

|                                                                      | N   | %    | OR    | 95% CI       | AOR   | 95% CI        |
|----------------------------------------------------------------------|-----|------|-------|--------------|-------|---------------|
| <b>Age</b>                                                           |     |      |       |              |       |               |
| ≤ 29                                                                 | 68  | 43.0 |       |              |       |               |
| > 29                                                                 | 90  | 57.0 | 2.57  | 1.17-5.66*   | 2.06  | 0.63-6.76     |
| <b>Marital status</b>                                                |     |      |       |              |       |               |
| Single                                                               | 75  | 47.4 |       |              |       |               |
| Married                                                              | 66  | 41.8 | 0.61  | 0.28-1.35    | 0.24  | 0.06-0.94*    |
| Divorced/Widower                                                     | 17  | 10.8 | 0.55  | 0.17-1.82    | 0.26  | 0.04-1.94     |
| <b>Education</b>                                                     |     |      |       |              |       |               |
| Primary/No formal education                                          | 61  | 29.0 |       |              |       |               |
| Secondary education                                                  | 67  | 31.9 | 1.57  | 0.64-3.86    | 2.59  | 0.63-10.60    |
| High school or above                                                 | 82  | 39.1 | 1.11  | 0.45-2.71    | 1.82  | 0.29-4.86     |
| <b>Ethnicity</b>                                                     |     |      |       |              |       |               |
| Burma                                                                | 35  | 22.2 |       |              |       |               |
| Shan                                                                 | 46  | 29.0 | 0.93  | 0.27-3.22    | 2.15  | 0.32-14.57    |
| Kachin                                                               | 35  | 22.2 | 0.22  | 0.07-0.71*   | 0.58  | 0.11-2.94     |
| Others                                                               | 42  | 26.6 | 0.53  | 0.16-1.74    | 0.83  | 0.16-4.27     |
| <b>Employment status</b>                                             |     |      |       |              |       |               |
| Non-regular job                                                      | 32  | 20.3 |       |              |       |               |
| Regular job                                                          | 126 | 79.7 | 2.91  | 1.26-6.70*   | 4.50  | 1.08-23.17*   |
| <b>Living status (Inter-regional migration)</b>                      |     |      |       |              |       |               |
| Migrant                                                              | 20  | 12.7 |       |              |       |               |
| Resident                                                             | 138 | 87.3 | 0.80  | 0.25-2.55    | 0.81  | 0.14-4.81     |
| <b>Most used drug type in the past 3 months</b>                      |     |      |       |              |       |               |
| Heroin                                                               | 156 | 98.7 | S/S   |              | S/S   |               |
| Stimulant and others                                                 | 2   | 1.3  |       |              |       |               |
| <b>Had history of poly drug use in the past 3 months</b>             |     |      |       |              |       |               |
| Never                                                                | 83  | 52.5 |       |              |       |               |
| Ever                                                                 | 75  | 47.5 | 0.40  | 0.18-0.85*   | 0.44  | 0.14-1.43     |
| <b>Had history of unsafe injection practice in the past 3 months</b> |     |      |       |              |       |               |
| No                                                                   | 107 | 52.5 |       |              |       |               |
| Yes                                                                  | 51  | 47.5 | 1.72  | 0.76-3.86    | 1.01  | 0.27-3.84     |
| <b>Frequency of injection per day</b>                                |     |      |       |              |       |               |
| ≤ 2                                                                  | 86  | 54.4 |       |              |       |               |
| > 2                                                                  | 72  | 45.6 | 0.41  | 0.19-0.88*   | 0.30  | 0.09-0.97*    |
| <b>Had history of FSW visit in the past 3 months</b>                 |     |      |       |              |       |               |
| Never                                                                | 73  | 46.2 |       |              |       |               |
| Ever                                                                 | 85  | 53.8 | 0.74  | 0.35-1.56    | 1.34  | 0.25-7.12     |
| <b>Sexual orientation</b>                                            |     |      |       |              |       |               |
| Hetero-sexual                                                        | 135 | 85.4 |       |              |       |               |
| Bi/Homo-sexual                                                       | 23  | 14.6 | 0.21  | 0.08-0.53**  | 0.61  | 0.13-2.84     |
| <b>Had more than one partners in the past 3 months</b>               |     |      |       |              |       |               |
| No                                                                   | 73  | 46.2 |       |              |       |               |
| Yes                                                                  | 85  | 53.8 | 0.40  | 0.18-0.89*   | 0.20  | 0.04-1.11     |
| <b>Ever received drug treatment</b>                                  |     |      |       |              |       |               |
| No                                                                   | 31  | 19.6 |       |              |       |               |
| Yes                                                                  | 127 | 80.4 | 14.57 | 5.82-36.47** | 13.07 | 3.38-50.53*** |
| <b>Ever register as a drug user</b>                                  |     |      |       |              |       |               |
| No                                                                   | 78  | 49.4 |       |              |       |               |
| Yes                                                                  | 80  | 50.6 | 5.33  | 2.25-12.62** | 2.21  | 0.57-8.63     |
| <b>Ever been in prison or jail</b>                                   |     |      |       |              |       |               |
| No                                                                   | 106 | 67.1 |       |              |       |               |
| Yes                                                                  | 52  | 32.9 | 0.56  | 0.26-1.19    | 0.44  | 0.10-1.84     |
| <b>Perceived HIV risk</b>                                            |     |      |       |              |       |               |
| No                                                                   | 90  | 57.0 |       |              |       |               |
| Yes                                                                  | 68  | 43.9 | 3.57  | 1.51-8.43**  | 5.70  | 1.40-23.25*   |

Note. OR: odd Ratio; CI: confidence interval; AOR: adjusted odd ratio; FSW: female sex worker  
<sup>§</sup> Had either receptive or distributive needle/syringe sharing  
 \* p <0.05; \*\* p <0.01; \*\*\* p <0.001; S/S=small sample size

1  
2  
3  
4  
5  
6  
7  
8  
9  
10  
11  
12  
13  
14  
15  
16  
17  
18  
19  
20  
21  
22  
23  
24  
25  
26  
27  
28  
29  
30  
31  
32  
33  
34  
35  
36  
37  
38  
39  
40  
41  
42  
43  
44  
45  
46  
47  
48  
49  
50  
51  
52  
53  
54  
55  
56  
57  
58  
59  
60

|                                                          | N   | %    | OR   | 95% CI      | AOR  | 95% CI       |
|----------------------------------------------------------|-----|------|------|-------------|------|--------------|
| <b>Age</b>                                               |     |      |      |             |      |              |
| ≤ 25                                                     | 116 | 55.2 |      |             |      |              |
| > 25                                                     | 94  | 44.8 | 1.17 | 0.68-2.02   | 0.75 | 0.33-1.71    |
| <b>Marital status</b>                                    |     |      |      |             |      |              |
| Single                                                   | 110 | 52.4 |      |             |      |              |
| Married                                                  | 68  | 32.4 | 0.62 | 0.33-1.15   | 0.52 | 0.22-1.21    |
| Divorced/Widower                                         | 32  | 15.2 | 0.88 | 0.40-1.94   | 0.39 | 0.13-1.18    |
| <b>Education</b>                                         |     |      |      |             |      |              |
| Primary/No formal education                              | 52  | 32.9 |      |             |      |              |
| Secondary education                                      | 58  | 36.7 | 2.04 | 1.01-4.13   | 2.38 | 0.95-5.97    |
| High school or above                                     | 48  | 30.4 | 1.29 | 0.66-2.55   | 1.48 | 0.58-3.77    |
| <b>Ethnicity</b>                                         |     |      |      |             |      |              |
| Burma                                                    | 45  | 21.4 |      |             |      |              |
| Shan                                                     | 66  | 31.4 | 0.28 | 0.12-0.62*  | 0.30 | 0.11-0.84*   |
| Kachin                                                   | 48  | 22.9 | 0.21 | 0.09-0.49** | 0.30 | 0.10-0.87*   |
| Others                                                   | 51  | 24.3 | 0.43 | 0.19-1.00   | 0.52 | 0.18-1.49    |
| <b>Employment status</b>                                 |     |      |      |             |      |              |
| Non-regular job                                          | 34  | 16.2 |      |             |      |              |
| Regular job                                              | 176 | 83.8 | 1.67 | 0.78-3.59   | 1.35 | 0.44-4.14    |
| <b>Living status (Inter-regional migration)</b>          |     |      |      |             |      |              |
| Migrant                                                  | 67  | 31.9 |      |             |      |              |
| Resident                                                 | 143 | 68.1 | 0.52 | 0.29-0.94*  | 0.55 | 0.26-1.17    |
| <b>Most used drug type in the past 3 months</b>          |     |      |      |             |      |              |
| Heroin                                                   | 87  | 41.4 |      |             |      |              |
| Stimulant and others                                     | 123 | 58.6 | 1.15 | 0.66-2.00   | 1.54 | 0.63-3.79    |
| <b>Had history of poly drug use in the past 3 months</b> |     |      |      |             |      |              |
| Never                                                    | 58  | 27.6 |      |             |      |              |
| Ever                                                     | 152 | 72.4 | 0.40 | 0.21-0.74*  | 0.33 | 0.14-0.77**  |
| <b>Had history of FSW visit in the past 3 months</b>     |     |      |      |             |      |              |
| Never                                                    | 80  | 38.1 |      |             |      |              |
| Ever                                                     | 130 | 61.9 | 0.50 | 0.29-0.88*  | 0.63 | 0.30-1.33    |
| <b>Sexual orientation</b>                                |     |      |      |             |      |              |
| Hetero-sexual                                            | 76  | 36.2 |      |             |      |              |
| Bi/Homo-sexual                                           | 134 | 63.8 | 1.77 | 0.99-3.14   | 1.72 | 0.73-4.03    |
| <b>Had more than one partners in the past 3 months</b>   |     |      |      |             |      |              |
| No                                                       | 35  | 16.7 |      |             |      |              |
| Yes                                                      | 175 | 83.3 | 0.87 | 0.42-1.80   | 0.80 | 0.27-2.38    |
| <b>Ever received drug treatment</b>                      |     |      |      |             |      |              |
| No                                                       | 139 | 66.2 |      |             |      |              |
| Yes                                                      | 71  | 33.8 | 2.73 | 1.51-4.92** | 3.58 | 1.38-9.24**  |
| <b>Ever register as a drug user</b>                      |     |      |      |             |      |              |
| No                                                       | 173 | 82.4 |      |             |      |              |
| Yes                                                      | 37  | 17.6 | 3.48 | 1.61-7.49** | 4.38 | 1.31-14.65** |
| <b>Ever been in prison or jail</b>                       |     |      |      |             |      |              |
| No                                                       | 174 | 82.9 |      |             |      |              |
| Yes                                                      | 36  | 17.1 | 1.08 | 0.52-2.21   | 1.28 | 0.35-4.65    |
| <b>Perceived HIV risk</b>                                |     |      |      |             |      |              |
| No                                                       | 120 | 57.1 |      |             |      |              |
| Yes                                                      | 90  | 42.9 | 3.29 | 1.86-5.83*  | 4.46 | 2.06-9.65*** |

Note. OR: odd Ratio; CI: confidence interval; AOR: adjusted odd ratio; FSW: female sex worker  
\* p <0.05; \*\* p <0.01; \*\*\* p <0.001; S/S=small sample size



STROBE 2007 (v4) Statement—Checklist of items that should be included in reports of *cross-sectional studies*

| Section/Topic        | Item # | Recommendation                                                                                                                                                                                                                                                                                                                                                                                                                                                                                                                                                                                                                                                                                                                                                                                                                                                                                                                                                                                                                                                                                                                                                                                                                                                                                                                                                                                                                                        | Reported on page # |
|----------------------|--------|-------------------------------------------------------------------------------------------------------------------------------------------------------------------------------------------------------------------------------------------------------------------------------------------------------------------------------------------------------------------------------------------------------------------------------------------------------------------------------------------------------------------------------------------------------------------------------------------------------------------------------------------------------------------------------------------------------------------------------------------------------------------------------------------------------------------------------------------------------------------------------------------------------------------------------------------------------------------------------------------------------------------------------------------------------------------------------------------------------------------------------------------------------------------------------------------------------------------------------------------------------------------------------------------------------------------------------------------------------------------------------------------------------------------------------------------------------|--------------------|
| Title and abstract   | 1      | <b>(a) Indicate the study's design with a commonly used term in the title or the abstract</b><br>A cross-sectional study that indentified factors associated with HIV testing among injecting (IDU) and non-injecting drug users (NIDUs).                                                                                                                                                                                                                                                                                                                                                                                                                                                                                                                                                                                                                                                                                                                                                                                                                                                                                                                                                                                                                                                                                                                                                                                                             | 1                  |
|                      |        | <b>(b) Provide in the abstract an informative and balanced summary of what was done and what was found</b><br>HIV testing is an effective intervention for reducing HIV risk. However, uptake of HIV testing is a major challenge within the drug-using population due to their illegal drug use behaviours. This study aimed to identify factors associated with HIV testing among IDUs and NIDUs in Lashio, Myanmar. A cross-sectional study was conducted from January to February 2010. In total, 158 male IDUs and 210 male NIDUs were recruited using a respondent-driven sampling method. A multivariate analysis was performed separately for IDUs and NIDUs. In this study, more IDUs underwent HIV testing than did NIDUs. The multivariate analysis revealed that having ever received drug treatment was positively associated with HIV testing among both IDUs and NIDUs. Integrating HIV testing into drug treatment and expanding drug treatment may be effective to increase HIV testing uptake among both IDUs and NIDUs in Myanmar.                                                                                                                                                                                                                                                                                                                                                                                                 | 1                  |
| <b>Introduction</b>  |        |                                                                                                                                                                                                                                                                                                                                                                                                                                                                                                                                                                                                                                                                                                                                                                                                                                                                                                                                                                                                                                                                                                                                                                                                                                                                                                                                                                                                                                                       |                    |
| Background/rationale | 2      | <b>Explain the scientific background and rationale for the investigation being reported</b><br>Myanmar is one of the countries hardest hit by the HIV epidemic in South-East Asia. Injecting drug use is a primary mode of HIV transmission in the country. The estimated number of drug users in 2008 was 300,000-400,000, of whom 90,000-150,000 were injecting drug users (IDUs). HIV prevalence among IDUs was 21.9 % in 2011 (NAP/Myanmar, 2012). HIV testing is a highly cost-effective intervention for HIV risk reduction and transmission to the general population. Early detection of HIV infection in individuals is essential to provide HIV-related support, care, and treatment, and to prevent further spread of infection. In addition, HIV testing and counseling can increase knowledge of HIV/AIDS, reduce risky sexual and drug use behaviors, and prevent other STIs. It is therefore important to encourage IDUs and non-injecting drug users (NIDUs) to be tested for HIV infection due to their risk behaviors. However, HIV testing uptake has been a major challenge within the drug using populations. Due to varying levels of stigma and discrimination associated with drug use and its illegality, access to mainstream public health services is often limited in the drug using population. In Myanmar, however, only limited information is available on the characteristics of drug users undergoing HIV testing. | 3 to 4             |
| Objectives           | 3      | <b>State specific objectives, including any prespecified hypotheses</b><br>The purpose of this study was to identify the characteristics of IDUs and NIDUs who underwent HIV testing and to identify factors associated with testing uptake in Lashio Township, Northern Shan State, Myanmar. We hypothesized NIDUs tested                                                                                                                                                                                                                                                                                                                                                                                                                                                                                                                                                                                                                                                                                                                                                                                                                                                                                                                                                                                                                                                                                                                            | 4                  |

|                |   |                                                                                                                                                                                                                                                                                                                                                                                                                                                                                                                                                                                                                                                                                                                                                                                                                                                                                                                                                                                                                                                                                                                                                                                                                                                                                                                                                                                                                                                                                                                                                                                                                                                                                    |        |
|----------------|---|------------------------------------------------------------------------------------------------------------------------------------------------------------------------------------------------------------------------------------------------------------------------------------------------------------------------------------------------------------------------------------------------------------------------------------------------------------------------------------------------------------------------------------------------------------------------------------------------------------------------------------------------------------------------------------------------------------------------------------------------------------------------------------------------------------------------------------------------------------------------------------------------------------------------------------------------------------------------------------------------------------------------------------------------------------------------------------------------------------------------------------------------------------------------------------------------------------------------------------------------------------------------------------------------------------------------------------------------------------------------------------------------------------------------------------------------------------------------------------------------------------------------------------------------------------------------------------------------------------------------------------------------------------------------------------|--------|
|                |   | HIV than IDUs.                                                                                                                                                                                                                                                                                                                                                                                                                                                                                                                                                                                                                                                                                                                                                                                                                                                                                                                                                                                                                                                                                                                                                                                                                                                                                                                                                                                                                                                                                                                                                                                                                                                                     |        |
| <b>Methods</b> |   |                                                                                                                                                                                                                                                                                                                                                                                                                                                                                                                                                                                                                                                                                                                                                                                                                                                                                                                                                                                                                                                                                                                                                                                                                                                                                                                                                                                                                                                                                                                                                                                                                                                                                    |        |
| Study design   | 4 | <b>Present key elements of study design early in the paper</b><br>A cross-sectional study                                                                                                                                                                                                                                                                                                                                                                                                                                                                                                                                                                                                                                                                                                                                                                                                                                                                                                                                                                                                                                                                                                                                                                                                                                                                                                                                                                                                                                                                                                                                                                                          | 4      |
| Setting        | 5 | <b>Describe the setting, locations, and relevant dates, including periods of recruitment, exposure, follow-up, and data collection</b><br>The study was conducted in Lashio city, Northern Shan State of Myanmar, a small hill-town located close to the Chinese border. Lashio is one of the priority townships in Myanmar that has been recommended for HIV interventions due to the high HIV prevalence among IDUs. IDUs' HIV prevalence in Lashio was 48.5 % in 2007, while that among NIDUs was not available in Myanmar. Data were collected in January and February 2010 using respondent-driven sampling (RDS) method . After obtaining written informed consent from each participant, the lead researcher and six trained interviewers conducted interviews for data collection. They interviewed the participants for 30-40 minutes for each in a private setting. Most interviews were conducted at a local drop-in center (DIC). The lead researcher and trained interviewers went to the field to recruit participants who were willing to participate in this study without coming to a DIC.                                                                                                                                                                                                                                                                                                                                                                                                                                                                                                                                                                        | 5 to 7 |
| Participants   | 6 | <b>(a) Give the eligibility criteria, and the sources and methods of selection of participants</b><br>In this study, IDUs were defined as individuals who have visible signs of injection and/or who injected drugs in the past 6 months. NIDUs were defined as those with no history of injecting drug use and those who used drugs by a non-injecting route in the past 6 months. Study participants were recruited using the following criteria: 1) male IDUs and NIDUs, 2) aged 18 years or older, 3) had used drugs in the last 6 months, 4) not suffering from a serious drug dependency and 5) able to speak Myanmar language.<br>A respondent-driven sampling (RDS) method was used to recruit a participant that is an effective method to reach hidden population. The first respondent was recruited from the pool of service-recipients at a local drop-in center. That successfully recruited participant was then provided with three coupons with serial numbers and instructions for passing those coupons to peers who were using drugs currently. Coupons were given a 2-weeks expiration date. The second respondent was also recruited in the same way. All respondents recruited in this manner received an Information, Education and Communication (IEC) pack that included 2 condoms with gel packs along with an incentive of 2000 Kyats (US\$ 2.5) as compensation for their time and travel. Respondents were eligible to receive a secondary incentive if recruits referred through them showed up at study sites to participate within the expiry period of their recruitment coupons. The secondary incentive was 500 kyats (0.5\$) per recruitment. | 5 to 6 |
| Variables      | 7 | <b>Clearly define all outcomes, exposures, predictors, potential confounders, and effect modifiers. Give diagnostic criteria, if applicable</b><br>The outcome variable was ever tested HIV. The exposure variables included socio-demographic characteristic, drug use, sexual, HIV testing behaviors, and health service utilization behaviors of the participants. The contents of the study                                                                                                                                                                                                                                                                                                                                                                                                                                                                                                                                                                                                                                                                                                                                                                                                                                                                                                                                                                                                                                                                                                                                                                                                                                                                                    | 6 to 7 |

|                              |    |                                                                                                                                                                                                                                                                                                                                                                                                                                                                                                                                                                                                                                                                                                                                         |    |
|------------------------------|----|-----------------------------------------------------------------------------------------------------------------------------------------------------------------------------------------------------------------------------------------------------------------------------------------------------------------------------------------------------------------------------------------------------------------------------------------------------------------------------------------------------------------------------------------------------------------------------------------------------------------------------------------------------------------------------------------------------------------------------------------|----|
|                              |    | questions were adapted from several different studies in Myanmar.                                                                                                                                                                                                                                                                                                                                                                                                                                                                                                                                                                                                                                                                       |    |
| Data sources/<br>measurement | 8* | <b>For each variable of interest, give sources of data and details of methods of assessment (measurement). Describe comparability of assessment methods if there is more than one group</b><br>The socio-demographic characteristics, drug use behavior and health services utilization questions were adapted from the Rapid Assessment and Response on Drug Use and from the HIV Survey of the Asian Harm Reduction Network, Myanmar . Sexual behaviors and HIV testing behavior questions were adapted from the Behavioral Surveillance Survey (BSS) Questionnaire of the Ministry of Health, Myanmar. Pre-testing of the full questionnaire used in this study was done in Lashio with 20 IDUs and 20 NIDUs before data collection. | 7  |
| Bias                         | 9  | <b>Describe any efforts to address potential sources of bias</b><br>HIV testing was self-reported by drug users, and we were not able to confirm their HIV status.                                                                                                                                                                                                                                                                                                                                                                                                                                                                                                                                                                      | 16 |
| Study size                   | 10 | <b>Explain how the study size was arrived at</b><br>Using RSD method, a total of 176 IDUs and 217 NIDUs were enrolled in this study. Of them, 18 IDUs and 7 NIDUs were excluded from analysis because of incomplete responses. The remaining participants, 158 IDUs and 210 NIDUs, were included in the present data analysis.                                                                                                                                                                                                                                                                                                                                                                                                          | 5  |
| Quantitative variables       | 11 | <b>Explain how quantitative variables were handled in the analyses. If applicable, describe which groupings were chosen and why</b><br>Data were coded and entered using the Statistical Package for the Social Sciences (SPSS) version 16 (SPSS Inc., Chicago, IL, USA) for all analyses. Data analysis was carried out separately for IDUs and NIDUs.                                                                                                                                                                                                                                                                                                                                                                                 | 8  |
| Statistical methods          | 12 | <b>(a) Describe all statistical methods, including those used to control for confounding</b><br>Descriptive statistics and $\chi^2$ tests were used to compare background characteristics of the participants. Bivariate analyses were initially conducted to examine factors associated with HIV testing. Finally, multivariate logistic regression was performed to calculate adjusted odds ratios (AORs), 95% confidence intervals (CIs), and corresponding <i>P</i> -values.                                                                                                                                                                                                                                                        | 8  |
|                              |    | <b>(b) Describe any methods used to examine subgroups and interaction</b><br>Not applicable                                                                                                                                                                                                                                                                                                                                                                                                                                                                                                                                                                                                                                             |    |
|                              |    | <b>(c) Explain how missing data were addressed</b><br>18 IDUs and 7 NIDUs were excluded from analysis because of incomplete responses. The remaining participants, 158 IDUs and 210 NIDUs, were included in the present data analysis.                                                                                                                                                                                                                                                                                                                                                                                                                                                                                                  | 5  |
|                              |    | <b>(d) If applicable, describe analytical methods taking account of sampling strategy</b><br>Not applicable                                                                                                                                                                                                                                                                                                                                                                                                                                                                                                                                                                                                                             |    |
|                              |    | <b>(e) Describe any sensitivity analyses</b>                                                                                                                                                                                                                                                                                                                                                                                                                                                                                                                                                                                                                                                                                            |    |

|                  |     |                                                                                                                                                                                                                                                                                                                                                                                                                                                                                                                                                                                                                                                                                                                                                                                                                                                                                                                                                                                                      |         |
|------------------|-----|------------------------------------------------------------------------------------------------------------------------------------------------------------------------------------------------------------------------------------------------------------------------------------------------------------------------------------------------------------------------------------------------------------------------------------------------------------------------------------------------------------------------------------------------------------------------------------------------------------------------------------------------------------------------------------------------------------------------------------------------------------------------------------------------------------------------------------------------------------------------------------------------------------------------------------------------------------------------------------------------------|---------|
|                  |     | Not applicable                                                                                                                                                                                                                                                                                                                                                                                                                                                                                                                                                                                                                                                                                                                                                                                                                                                                                                                                                                                       |         |
| <b>Results</b>   |     |                                                                                                                                                                                                                                                                                                                                                                                                                                                                                                                                                                                                                                                                                                                                                                                                                                                                                                                                                                                                      |         |
| Participants     | 13* | <b>(a) Report numbers of individuals at each stage of study—eg numbers potentially eligible, examined for eligibility, confirmed eligible, included in the study, completing follow-up, and analysed</b><br>176 IDUs and 217 NIDUs were recruited in this study. Due to incomplete responses, 18 IDUs and 7 NIDUs were excluded from analysis.                                                                                                                                                                                                                                                                                                                                                                                                                                                                                                                                                                                                                                                       | 5       |
|                  |     | <b>(b) Give reasons for non-participation at each stage</b><br>Not applicable                                                                                                                                                                                                                                                                                                                                                                                                                                                                                                                                                                                                                                                                                                                                                                                                                                                                                                                        |         |
|                  |     | <b>(c) Consider use of a flow diagram</b><br>Not applicable                                                                                                                                                                                                                                                                                                                                                                                                                                                                                                                                                                                                                                                                                                                                                                                                                                                                                                                                          |         |
| Descriptive data | 14* | <b>(a) Give characteristics of study participants (eg demographic, clinical, social) and information on exposures and potential confounders</b><br>The socio-demographic characteristics of the IDUs and NIDUs. Of the 368 respondents, 158 participants were IDUs and 210 participants were NIDUs. The mean age was significantly different between IDUs and NIDUs; 29.8 (SD 6.7) years for IDUs and 25.5 (SD 5.8) years for NIDUs (P < 0.001). Among IDUs, 48.7% were between 21-30 years and 31.6% were between 31-40 years of age. Of the NIDUs, 63.8% were between 21-30 years and 14.3% were between 31-40 years. With regard to education levels, about a third of IDUs and NIDUs had primary or no formal education. Overall, 12.7% of IDUs and a significantly higher percentage of NIDUs (31.9%) had migrated to Lashio from another part of Myanmar (P < 0.001).                                                                                                                          | 9       |
|                  |     | <b>(b) Indicate number of participants with missing data for each variable of interest</b><br>Not applicable                                                                                                                                                                                                                                                                                                                                                                                                                                                                                                                                                                                                                                                                                                                                                                                                                                                                                         |         |
| Outcome data     | 15* | <b>Report numbers of outcome events or summary measures</b><br>In total, 76.6% of IDUs and 45.7% of NIDUs were ever tested for HIV.                                                                                                                                                                                                                                                                                                                                                                                                                                                                                                                                                                                                                                                                                                                                                                                                                                                                  | 9 to 10 |
| Main results     | 16  | <b>(a) Give unadjusted estimates and, if applicable, confounder-adjusted estimates and their precision (eg, 95% confidence interval). Make clear which confounders were adjusted for and why they were included</b><br><b><u>IDUs model</u></b><br>Bivariate analysis showed that those belonging to the older age group (odd ratio [OR] 2.57; 95% confidence interval [CI]: 1.17-5.66) and those who had a regular job (OR 2.91; 95% CI: 1.26-6.70) were more likely to have tested for HIV. Conversely, IDUs who practiced risky behaviors such as using more than two kinds of drugs (poly drugs) (OR 0.40; 95% CI: 0.18-0.85) and injecting drugs more than twice per day (OR 0.41; 95% CI: 0.19-0.88) were less likely to have tested for HIV. Participants who had ever received drug treatment (OR 14.57; 95% CI: 5.82-36.47), who had ever registered as a drug user (OR 5.33; 2.25-12.62), and who perceived themselves as being at risk of HIV infection (OR 3.57; 95% CI: 1.51-8.43) were | 9 to 11 |

|                          |           |                                                                                                                                                                                                                                                                                                                                                                                                                                                                                                                                                                                                                                                                                                                                                                                                                                                                                                                                                                                                                                                                                                                                                                                                                                                                                                                                                                                                                                                                                                                                                                                                                                                                                                                                                                                                                                                                                                                                                                                                                                                                           |                 |
|--------------------------|-----------|---------------------------------------------------------------------------------------------------------------------------------------------------------------------------------------------------------------------------------------------------------------------------------------------------------------------------------------------------------------------------------------------------------------------------------------------------------------------------------------------------------------------------------------------------------------------------------------------------------------------------------------------------------------------------------------------------------------------------------------------------------------------------------------------------------------------------------------------------------------------------------------------------------------------------------------------------------------------------------------------------------------------------------------------------------------------------------------------------------------------------------------------------------------------------------------------------------------------------------------------------------------------------------------------------------------------------------------------------------------------------------------------------------------------------------------------------------------------------------------------------------------------------------------------------------------------------------------------------------------------------------------------------------------------------------------------------------------------------------------------------------------------------------------------------------------------------------------------------------------------------------------------------------------------------------------------------------------------------------------------------------------------------------------------------------------------------|-----------------|
|                          |           | <p>significantly more likely to have tested for HIV. The multivariate model for IDUs indicated that those who were married (AOR 0.24; 95% CI: 0.06-0.94) and injected drugs twice daily (AOR 0.30; 95% CI: 0.09-0.97) were less likely to have tested for HIV. Meanwhile, IDUs having a regular job (AOR 4.50; 95% CI: 1.08-23.17), who had received drug treatment (AOR 13.07; 95% CI: 3.38-50.53), and perceived themselves as being at risk of HIV (AOR 5.70; 95% CI: 1.40-23.25) were more likely to have undergone HIV testing.</p> <p><b><u>NIDUs model</u></b></p> <p>Nearly half of NIDUs (45.7%) had ever tested for HIV. Being of Shan (OR 0.28; 95% CI: 0.12-0.62) or Kachin (OR 0.21; 95% CI: 0.09-0.49) ethnicity, reporting poly drug use (OR 0.40; 95% CI: 0.21-0.74), and having visited a female sex worker within the last 3 months (OR 0.50; 95% CI: 0.29-0.88) were negatively associated with HIV testing. Conversely, NIDUs who had ever received drug treatment (OR 2.73; 95% CI: 1.51-4.92), had ever registered as a drug user (OR 3.48; 95% CI: 1.61-7.49), and who perceived themselves as being at risk of HIV infection (OR 3.29; 95% CI: 1.86-5.83) were more likely to have tested for HIV. In the multivariate model for NIDUs, individuals who were of Shan (AOR 0.30; 95% CI: 0.11-0.84) or Kachin (AOR 0.30; 95% CI: 0.10-0.87) ethnicity and who reported poly drug use within the last three months (AOR 0.33; 95% CI: 0.14-0.77) were less likely to have tested for HIV. Similar results as were observed among IDUs were observed among NIDUs, too. NIDUs who had ever received drug treatment (AOR 3.58; 95% CI: 1.38-9.24), ever registered as a drug user (AOR 4.38; 95% CI: 1.31-14.65), and who perceived themselves as at risk of HIV (AOR 4.46; 95% CI: 2.06-9.65) were more likely to have tested for HIV.</p> <p>We included all variables in the multivariate model to see which factors were most influencing factors of uptake of HIV test analysis even though it was not significant in the bivariate analysis.</p> |                 |
|                          |           | <p><b>(b) Report category boundaries when continuous variables were categorized</b></p> <p>Mean age was used to categorize age variable.</p>                                                                                                                                                                                                                                                                                                                                                                                                                                                                                                                                                                                                                                                                                                                                                                                                                                                                                                                                                                                                                                                                                                                                                                                                                                                                                                                                                                                                                                                                                                                                                                                                                                                                                                                                                                                                                                                                                                                              |                 |
|                          |           | <p><b>(c) If relevant, consider translating estimates of relative risk into absolute risk for a meaningful time period</b></p> <p>Not applicable</p>                                                                                                                                                                                                                                                                                                                                                                                                                                                                                                                                                                                                                                                                                                                                                                                                                                                                                                                                                                                                                                                                                                                                                                                                                                                                                                                                                                                                                                                                                                                                                                                                                                                                                                                                                                                                                                                                                                                      |                 |
| <p>Other analyses</p>    | <p>17</p> | <p><b>Report other analyses done—eg analyses of subgroups and interactions, and sensitivity analyses</b></p> <p>Not applicable</p>                                                                                                                                                                                                                                                                                                                                                                                                                                                                                                                                                                                                                                                                                                                                                                                                                                                                                                                                                                                                                                                                                                                                                                                                                                                                                                                                                                                                                                                                                                                                                                                                                                                                                                                                                                                                                                                                                                                                        |                 |
| <p><b>Discussion</b></p> |           | <p>This is the first study to identify the factors associated with HIV testing uptake among IDUs and NIDUs in Lashio, where HIV prevalence among IDUs was one of the highest in Myanmar (NAP/Myanmar, 2008). IDUs' HIV testing rate was higher compared to that of NIDUs' where harm reduction programs were implemented, especially where such programs targeted IDUs. Among IDUs, 76.6% had ever tested for HIV, while 45.7% of NIDUs had ever tested for HIV. These percentages are much higher compared to one-year testing rates reported among Italian drug users: 37.4% for IDUs and 28% for NIDUs (Camoni et al., 2011). HIV testing was positively associated with ever received drug treatment and perception of personal risk of HIV infection among both IDUs and NIDUs. IDUs who had a regular job at the time of survey were also more likely to have undergone HIV testing. Married IDUs and IDUs who injected more than twice daily, meanwhile, were less likely to have undergone HIV testing. Among NIDUs, those who had ever registered as a drug user were more likely to have undergone HIV testing. NIDUs of Shan or Kachin ethnicity and who reported poly drug use within the last three months</p>                                                                                                                                                                                                                                                                                                                                                                                                                                                                                                                                                                                                                                                                                                                                                                                                                                               | <p>11 to 16</p> |

1  
2  
3  
4  
5  
6  
7  
8  
9  
10  
11  
12  
13  
14  
15  
16  
17  
18  
19  
20  
21  
22  
23  
24  
25  
26  
27  
28  
29  
30  
31  
32  
33  
34  
35  
36  
37  
38  
39  
40  
41  
42  
43  
44  
45  
46  
47  
48  
49

were less likely to have undergone HIV testing.

Notably, both IDUs and NIDUs who had ever received drug treatment were more likely to have been tested for HIV. In Vietnam, female sex workers who spent time in a rehabilitation center were more likely to have tested for HIV (Grayman et al., 2005). Also in Italy, IDUs who had ever received both pharmacological and psychological treatments were more likely to have tested for HIV than were those who underwent only one kind of treatment (Camoni et al., 2011). Drug treatment is playing an important role to reduce risk of HIV infection among both drug users (CDC, 2002). However, HIV testing is not currently a compulsory service at drug treatment centers in Myanmar unless a drug user undergoing detoxification requests it. Since HIV testing and counseling effectively reduce risk behaviors in drug using populations, the United States Centers for Disease Control and Prevention recommends that HIV testing should be integrated into drug treatment services (CDC, 2002). Expanding drug treatment to incorporate HIV testing services may increase the number of IDUs and NIDUs accessing HIV testing services in Myanmar, too.

Within both types of drug users, those who had engaged in risk behaviors were less likely to have tested for HIV. Both IDUs who injected twice daily and NIDUs who used more than two drugs (poly drug use) were less likely to have been tested for HIV. It is not surprising that the drug users are more prone to feeling afraid of receiving HIV testing results due to their risky behaviors (Spielberg, Kurth, Gorbach, & Goldbaum, 2001).

In this study, perceived risk of HIV infection was a significant predictor for HIV testing among both drug users. They may perceive themselves as at risk of HIV infection because they learn their partner’s HIV status (Adih & Alexander, 1999) or may weigh the implications of their risky drugs use and sexual behaviors (Filipe et al., 2005). In this study, we did not confirm participants’ HIV status due to ethical considerations. Regardless of HIV status and risk behaviors, perceived risk of HIV infection is a self-protective behavior which can motivate individuals to practice safer behaviors (Reisen & Poppen, 1999).

This study showed that IDUs who had a regular job were more likely to have been tested for HIV infection. The possible reason for this is that Myanmar National AIDS Programs included workplace as a priority setting for HIV/AIDS intervention/prevention program (NAP/Myanmar, 2010). Thus, IDUs who had a regular job have been tested for HIV infection through those programs. On the other hand, conflicting findings found among Russian IDUs (Niccolai et al., 2010) and tuberculosis patients from Uganda (Sendagire et al., 2010) and Ethiopia (Jerene, Endale, & Lindtjorn, 2007). In these studies, unemployed or part-time workers were more likely to test for HIV than employed or full time workers. In the present study, married IDUs were less likely to have been tested for HIV than single IDUs. This is an important finding since two-fifths of all new HIV infections in Myanmar occurred through husband-to-wife transmission in 2010 and the trend of husband-to-wife transmission is estimated to increase to nearly half of all new infections among women by 2015 (Myat, 2010). HIV testing programs urgently need to focus on encouraging married IDUs to undergo HIV testing. In China, too, married men who have sex with men (MSM) were less likely to have been tested for HIV (Wei et al., 2011).

NIDUs who registered as drug users in the Government facilities were more likely to have been tested for HIV. Encouraging drug users to register as drug users may be effective to increase the uptake of HIV testing services among NIDUs. Nevertheless, most of the drug users were reluctant to register as a drug user due to several barriers, including stigma toward drug addicts, financial problems (Appel, Ellison, Jansky, & Oldak, 2004), fear of being known as a drug user, perceived low efficacy of available treatment, and the possibility of losing employment opportunities (Bobrova et al., 2006; Tucker, 2001). Another important finding was that NIDUs who were of Shan or Kachin ethnicities were less likely to have tested their HIV status than were those of Burma ethnicity. It may be because most of the IEC materials, HIV testing

|                  |    |                                                                                                                                                                                                                                                                                                                                                                                                                                                                                                                                                                                                                                                                                                                                                                                                                                                                                                                                                                                                                                                                                                                                                                                                                                                                                                                                                                              |          |
|------------------|----|------------------------------------------------------------------------------------------------------------------------------------------------------------------------------------------------------------------------------------------------------------------------------------------------------------------------------------------------------------------------------------------------------------------------------------------------------------------------------------------------------------------------------------------------------------------------------------------------------------------------------------------------------------------------------------------------------------------------------------------------------------------------------------------------------------------------------------------------------------------------------------------------------------------------------------------------------------------------------------------------------------------------------------------------------------------------------------------------------------------------------------------------------------------------------------------------------------------------------------------------------------------------------------------------------------------------------------------------------------------------------|----------|
|                  |    | information, and HIV counseling services were conducted in Myanmar language, which Shan and Kachin ethnicities were not always familiar with. Participants who do not speak or read Myanmar language may have had difficulty in accessing HIV testing services. If HIV testing services were offered in other languages for minorities such as Shan and Kachin, they would be better able to make use of those services.                                                                                                                                                                                                                                                                                                                                                                                                                                                                                                                                                                                                                                                                                                                                                                                                                                                                                                                                                     |          |
| Key results      | 18 | <b>Summarise key results with reference to study objectives</b><br>Both IDUs and NIDUs who had ever received drug treatment were more likely to have tested for HIV. More IDUs received HIV testing compared to NIDUs. Low HIV testing rates were found among IDUs who were married and who injected twice per day and among NIDUs reporting poly drug use within the last three months and who were of Kachin or Shan ethnicity. To increase HIV testing rate especially among NIDUs, we need to encourage them to register as a drug users and providing them with HIV services in Myanmar language as well as in ethnic languages. Integrating HIV testing into drug treatment and expanding drug treatment services is an effective way to increase utilization of HIV testing among both types of drug users in Myanmar.                                                                                                                                                                                                                                                                                                                                                                                                                                                                                                                                                | 16       |
| Limitations      | 19 | <b>Discuss limitations of the study, taking into account sources of potential bias or imprecision. Discuss both direction and magnitude of any potential bias</b><br>Our findings are derived from a cross-sectional study, and several possible limitations of these findings should be noted. First, HIV testing was self-reported by drug users, and we were not able to confirm their HIV status. Second, the lack of identified significant correlates of HIV testing may be due to insufficient sample size for the required statistical power or loss of information resulting from dichotomization of covariates. Despite these potential methodological limitations, these results present the first look at HIV testing behaviors among drug users in Lashio, the famous border trade city with a high burden of HIV infection. Further research is needed to understand barriers and decisions to access HIV testing among drug users especially for those who are married and engaged in risk behaviors.                                                                                                                                                                                                                                                                                                                                                         | 16       |
| Interpretation   | 20 | <b>Give a cautious overall interpretation of results considering objectives, limitations, multiplicity of analyses, results from similar studies, and other relevant evidence</b><br>Results may need to be carefully interpreted as drug users from other cities from Myanmar may have different characteristics. However, IDUs who had ever received both pharmacological and psychological treatments were more likely to have tested for HIV than were those who underwent only one kind of treatment in Italy (Camoni et al., 2011) and female sex workers from Vietnam who spent time in a rehabilitation center were more likely to have tested for HIV (Grayman et al., 2005). Drug treatment is playing an important role to reduce risk of HIV infection among both drug users (CDC, 2002). However, HIV testing is not currently a compulsory service at drug treatment centers in Myanmar unless a drug user undergoing detoxification requests it. Since HIV testing and counseling effectively reduce risk behaviors in drug using populations, the United States Centers for Disease Control and Prevention recommends that HIV testing should be integrated into drug treatment services (CDC, 2002). Expanding drug treatment to incorporate HIV testing services may increase the number of IDUs and NIDUs accessing HIV testing services in Myanmar, too. | 12 to 13 |
| Generalisability | 21 | <b>Discuss the generalisability (external validity) of the study results</b><br>Our results may not be generalized to drug users in other cities, as both IDUs and NIDUs from other parts of Myanmar may have different characteristics than those in Lashio.                                                                                                                                                                                                                                                                                                                                                                                                                                                                                                                                                                                                                                                                                                                                                                                                                                                                                                                                                                                                                                                                                                                |          |



1  
2  
3  
4  
5  
6  
7  
8  
9  
10  
11  
12  
13  
14  
15  
16  
17  
18  
19  
20  
21  
22  
23  
24  
25  
26  
27  
28  
29  
30  
31  
32  
33  
34  
35  
36  
37  
38  
39  
40  
41  
42  
43  
44  
45  
46  
47  
48  
49

|                          |    |                                                                                                        |    |
|--------------------------|----|--------------------------------------------------------------------------------------------------------|----|
| <b>Other information</b> |    |                                                                                                        |    |
| Funding                  | 22 | This study has received funding from the University of Tokyo and the ITO foundation (G 0114) of Tokyo. | 17 |

\*Give information separately for cases and controls in case-control studies and, if applicable, for exposed and unexposed groups in cohort and cross-sectional studies.

**Note:** An Explanation and Elaboration article discusses each checklist item and gives methodological background and published examples of transparent reporting. The STROBE checklist is best used in conjunction with this article (freely available on the Web sites of PLoS Medicine at <http://www.plosmedicine.org/>, Annals of Internal Medicine at <http://www.annals.org/>, and Epidemiology at <http://www.epidem.com/>). Information on the STROBE Initiative is available at [www.strobe-statement.org](http://www.strobe-statement.org).
